# Supplementary material for: Quality of Life After Bariatric Surgery—a Systematic Review with Bayesian Network Meta-analysis
Source: Springer Nature journal article supplement (doi:10.1007/s11695-021-05687-1), 2021-10-11
Supplement: MOESM3 [file 19746444]

| Basic characteristics of the patients in the studies |                           |             |              |       |       |        |        |        |      |           |        |           |           |        |        |       |         |
|------------------------------------------------------|---------------------------|-------------|--------------|-------|-------|--------|--------|--------|------|-----------|--------|-----------|-----------|--------|--------|-------|---------|
| First Author                                         | Intervention<br>A/B/C/D   | BMI<br>A    | BMI B        | BMI C | BMI D | DM A   | DM B   | DM C   | DM D | OSAS<br>A | OSAS B | OSAS<br>C | OSAS<br>D | HT A   | HT B   | HT C  | HT<br>D |
| Lee WJ [41]                                          | VBG/LRYGB                 | 43.14       | 43.18        | -     | -     | ND     | ND     | -      | -    | ND        | ND     | -         | -         | ND     | ND     | -     | -       |
| Lee WJ [42]                                          | LRYGB/OAGB                | 43.8        | 44.8         | -     | -     | ND     | ND     | -      | -    | ND        | ND     | -         | -         | ND     | ND     | -     | -       |
| Müller MK [43]                                       | LRYGB/LAGB                | 45.7        | 45.3         | -     | -     | 17.31% | 13.46% | -      | -    | ND        | ND     | -         | -         | ND     | ND     | -     | -       |
| Campos GM<br>[44]                                    | LAGB/LYRGB                | 45.7        | 46           | -     | -     | 40%    | 42%    | -      | -    | 12%       | 19%    | -         | -         | 57%    | 63%    | -     | -       |
| Søvik TT [45]                                        | LRYGB/BPD-DS.             | 54.8        | 55.2         | -     | -     | 16.13% | 20.69% | -      | -    | ND        | ND     | -         | -         | 25.81% | 27.59% | -     | -       |
| Alley JB [46]                                        | LSG/LAGB                  | 42.7        | 41.9         | -     | -     | ND     | ND     | -      | -    | ND        | ND     | -         | -         | ND     | ND     | -     | -       |
| Lee WJ [47]                                          | LRYGB/OAGB                | 40.5        | 41.1         | -     | -     | ND     | ND     | -      | -    | ND        | ND     | -         | -         | ND     | ND     | -     | -       |
| Carlin AM [48]                                       | LRYGB/LSG/LAGB            | 47          | 48           | 48    | -     | 0.0102 | 0.0105 | 0.0102 | -    | 0.0149    | 0.0149 | 0.0149    | -         | 0.0176 | 0.018  | 0.018 | -       |
| Karlsen TI [49]                                      | LRYGB/LI                  | 46          | 43           | -     | -     | ND     | ND     | -      | -    | ND        | ND     | -         | -         | ND     | ND     | -     | -       |
| O'Brien PE [50]                                      | LAGB/LI                   | 33.62       | 33.19        | -     | -     | 100%   | 100%   | -      | -    | ND        | ND     | -         | -         | ND     | ND     | -     | -       |
| Kaseja K [51]                                        | LRYGB/LSG                 | 45.1        | 46.5         | -     | -     | ND     | ND     | -      | -    | ND        | ND     | -         | -         |        |        | -     | -       |
| Duarte MIX<br>[52]                                   | BPD-DS/banded-GB          | 138.8<br>kg | 121.65<br>kg | -     | -     | 47.06% | 55%    | -      | -    | 52.90%    | 65%    | -         | -         | 64.71% | 85%    | -     | -       |
| Strain GW [53]                                       | LRYGB/BPD-<br>DS/LAGB/LSG | 46.6        | 56.9         | 45.3  | 58    | ND     | ND     | ND     | ND   | ND        | ND     | ND        | ND        | ND     | ND     | ND    | ND      |
| Schauer PR                                           | LI/LRYGB/LSG              | 36.4        | 37.1         | 36.1  | -     | 97.50% | 97.92% | 97.96% | -    | ND        | ND     | ND        | -         | ND     | ND     | ND    | -       |

|                    |                            |       |       |      |      |        |        |    |    |        |        |    |    |        |        |    |    |
|--------------------|----------------------------|-------|-------|------|------|--------|--------|----|----|--------|--------|----|----|--------|--------|----|----|
| [54]               |                            |       |       |      |      |        |        |    |    |        |        |    |    |        |        |    |    |
| Bhandari M<br>[55] | LRYGB/banded-GB            | 42.16 | 44.13 | -    | -    | 55.45% | 60.94% | -  | -  | 63.37% | 57.81% | -  | -  | 61.39% | 67.19% | -  | -  |
| Major P [56]       | LSG/LRYGB                  | 49.98 | 50.72 | -    | -    | ND     | ND     | -  | -  | ND     | ND     | -  | -  | ND     | ND     | -  | -  |
| Lee WJ [57]        | LSG/LRYGB/OAGB             | 37.5  | 37.5  | 37.4 | -    | ND     | ND     | ND | -  | ND     | ND     | ND | -  | ND     | ND     | ND | -  |
| Barr AC [58]       | LRYGB/LSG                  | 47    | 49.1  | -    | -    | ND     | ND     | -  | -  | ND     | ND     | -  | -  | ND     | ND     | -  | -  |
| Buzgova R [59]     | LSG/LGCP                   | 42.8  | 42.4  | -    | -    | ND     | ND     | -  | -  | ND     | ND     | -  | -  | ND     | ND     | -  | -  |
| Figura A [60]      | LSG/LI                     | 51.5  | 40.3  | -    | -    | ND     | ND     | -  | -  | ND     | ND     | -  | -  | ND     | ND     | -  | -  |
| Risstad H [61]     | LRYGB/dista-GB             | 54.5  | 55.3  | -    | -    | 16.13% | 20.68% | -  | -  | 16.13% | 20.68% | -  | -  | 25.81% | 27.59% | -  | -  |
| Ignat M [62]       | LRYGB/LSG                  | 47    | 45.5  | -    | -    | ND     | ND     | -  | -  | ND     | ND     | -  | -  | ND     | ND     | -  | -  |
| Janik MR [63]      | LSG/LRYGB                  | 47.1  | 38.1  | -    | -    | 7.14%  | 30%    | -  | -  | ND     | ND     | -  | -  | 32.14% | 33.30% | -  | -  |
| Nickel F [64]      | LSG/LRYGB                  | ND    | ND    | -    | -    | ND     | ND     | -  | -  | ND     | ND     | -  | -  | ND     | ND     | -  | -  |
| Omotosho P<br>[65] | LRYGB/LI                   | 40.1  | 43.4  | -    | -    | ND     | ND     | -  | -  | ND     | ND     | -  | -  | ND     | ND     | -  | -  |
| Panosian J [66]    | LRYGB/LI                   | 36    | 36.5  | -    | -    | ND     | ND     | -  | -  | ND     | ND     | -  | -  | ND     | ND     | -  | -  |
| Accardi R [67]     | LRYGB/LAGB                 | 45    | 41    | -    | -    | ND     | ND     | -  | -  | ND     | ND     | -  | -  | ND     | ND     | -  | -  |
| Elrefai M [68]     | LRYGB/LSG/BPD-<br>DS./LAGB | 46.3  | 56.1  | 56.1 | 46.3 | ND     | ND     | ND | ND | ND     | ND     | ND | ND | ND     | ND     | ND | ND |
| Biter LU [69]      | LRYGB/LSG                  | 44.03 | 44.17 | -    | -    | 20.27% | 25%    | -  | -  | 12.16% | 6.58%  | -  | -  | 17.57% | 25%    | -  | -  |
| Peterli R [70]     | LSG/LRYGB                  | 43.4  | 44    | -    | -    | 24.30% | 26.36% | -  | -  | 47.66% | 41.82% | -  | -  | 62.62% | 59.09% | -  | -  |

|                         |                  |       |       |      |   |        |        |        |   |        |        |    |   |        |        |    |   |
|-------------------------|------------------|-------|-------|------|---|--------|--------|--------|---|--------|--------|----|---|--------|--------|----|---|
| Svanevik M<br>[71]      | LRYGB/distal-GB  | 53.3  | 53.6  | -    | - | ND     | ND     | -      | - | ND     | ND     | -  | - | ND     | ND     | -  | - |
| Versteegden<br>DPA [72] | LSG/LRYGB        | 44.5  | 42.3  | -    | - | 17.57% | 17.76% | -      | - | 16.07% | 10.81% | -  | - | 39.34% | 34.17% | -  | - |
| Schauer PR<br>[73]      | LI/LRYGB/LSG     | 36.4  | 37.1  | 36.1 | - | 97.50% | 97.92% | 97.96% | - | ND     | ND     | ND | - | ND     | ND     | ND | - |
| Salminen P<br>[24]      | LSG/LRYGB        | 47.3  | 48.4  | -    | - | 42.98% | 41.18% | -      | - | ND     | ND     | -  | - | 68.6%  | 73.11% | -  | - |
| Homan J [31]            | LRYGB/LB-GB      | 45    | 43    | -    | - | 31.08% | 34.33% | -      | - | ND     | ND     | -  | - | 32.43% | 49.25% | -  | - |
| Peterli R [25]          | LSG/LRYGB        | 43.6  | 44.2  | -    | - | 24.3%  | 26.36% | -      | - | 47.66% | 41.82% | -  | - | 62.62% | 59.09% | -  | - |
| Elias K [74]            | LRYGB/BPD-DS.    | 42.7  | 57.1  | -    | - | ND     | ND     | -      | - | ND     | ND     | -  | - | ND     | ND     | -  | - |
| Silva JN [75]           | LRYGB/LSG        | 41.41 | 43.73 | -    | - | ND     | ND     | -      | - | ND     | ND     | -  | - | ND     | ND     | -  | - |
| Catheline JM<br>[76]    | LSG/LRYGB        | 45.2  | 45.3  | -    | - | ND     | ND     | -      | - | ND     | ND     | -  | - | ND     | ND     | -  | - |
| Nabil TM [39]           | OAGB/distal-OAGB | 52.2  | 54.9  | -    | - | 46.67% | 53.33% | -      | - | ND     | ND     | -  | - | 33.33% | 30%    | -  | - |
| Skogar M [77]           | BPD-DS./LRYGB    | 55    | 54.7  | -    | - | 20.12% | 14.49% | -      | - | ND     | ND     | -  | - | 38.14% | 35.96% | -  | - |
| Lechaux D [78]          | LSG/OAGB         | 45.8  | 45.3  | -    | - | ND     | ND     | -      | - | ND     | ND     | -  | - | ND     | ND     | -  | - |
| Monpellier VM<br>[79]   | LSG/LRYGB        | 48.1  | 44.6  | -    | - | 12.33% | 24.43% | -      | - | 15.07% | 11.09% | -  | - | 34.7%  | 39.41% | -  | - |
| Poelemeijer             | LSG/LRYGB        | 45.8  | 43    | -    | - | 17.62% | 29.75% | -      | - | 20.73% | 20.83% | -  | - | 28.91% | 40.86% | -  | - |

| YQM [80]                                                                                                                                                                                                                                                                                                                                                                                                             |                                                                                                                                                                                                                                                                                                                                                                                                               |  |  |  |  |  |  |  |  |  |  |  |  |  |  |  |  |  |
|----------------------------------------------------------------------------------------------------------------------------------------------------------------------------------------------------------------------------------------------------------------------------------------------------------------------------------------------------------------------------------------------------------------------|---------------------------------------------------------------------------------------------------------------------------------------------------------------------------------------------------------------------------------------------------------------------------------------------------------------------------------------------------------------------------------------------------------------|--|--|--|--|--|--|--|--|--|--|--|--|--|--|--|--|--|
| <p>LI – lifestyle intervention</p> <p>LSG - laparoscopic sleeve gastrectomy</p> <p>LRYGB - laparoscopic Roux-en-Y gastric bypass</p> <p>BPD-DS - laparoscopic biliopancreatic diversion with duodenal switch</p> <p>VBG - vertical banded gastroplasty</p> <p>LAGB - laparoscopic adjustable gastric banding</p> <p>LGCP - laparoscopic greater curvature plication</p> <p>OAGB – one anastomosis gastric bypass</p> | <p>Banded-GB – banded laparoscopic Roux-en-Y gastric bypass</p> <p>Distal-GB – distal laparoscopic Roux-en-Y gastric bypass</p> <p>Distal-OAGB – distal one anastomosis gastric bypass</p> <p>LB-GB – prolonged biliopancreatic limb gastric bypass</p> <p>BMI – body mass index</p> <p>DM – diabetes mellitus</p> <p>OSAS – obstructive sleep apnea syndrome</p> <p>HT – hypertension</p> <p>ND- no data</p> |  |  |  |  |  |  |  |  |  |  |  |  |  |  |  |  |  |

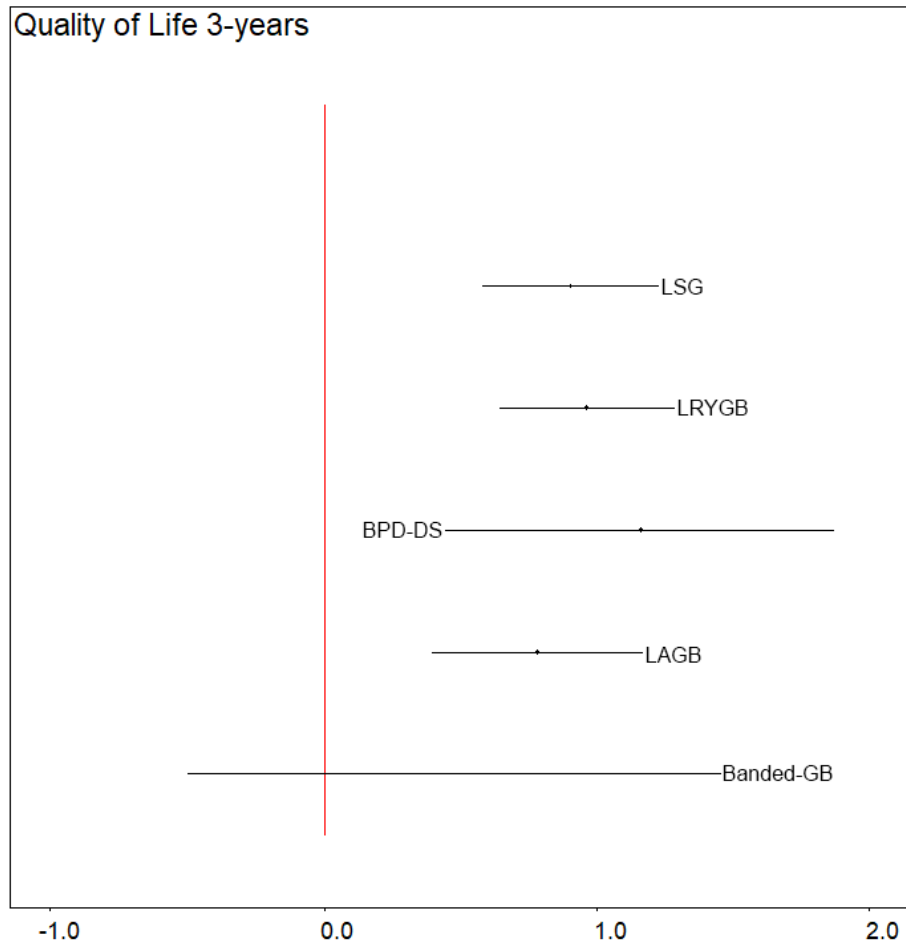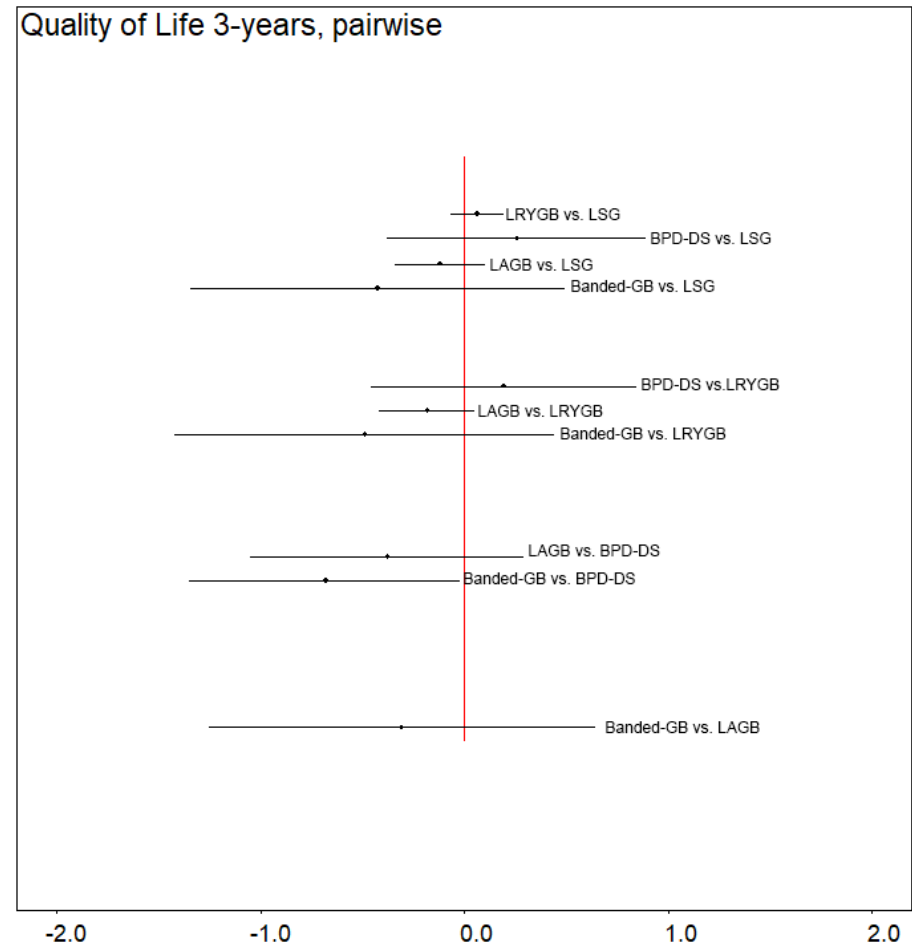

Pooled results of total HRQoL presented as SMD at 3 years a) in comparison to lifestyle intervention b) pairwise comparisons between surgeries

| HRQoL after 3 years presented GIQLI scale (0-144)                                                                                                               |                        |                        |                                                                                                                                                                       |                         |                        |                       |
|-----------------------------------------------------------------------------------------------------------------------------------------------------------------|------------------------|------------------------|-----------------------------------------------------------------------------------------------------------------------------------------------------------------------|-------------------------|------------------------|-----------------------|
|                                                                                                                                                                 | LI                     | LSG                    | LRYGB                                                                                                                                                                 | BPD-DS                  | LAGB                   | Banded-GB             |
| LSG                                                                                                                                                             | 20.05(12.89 to 27.29)  | -                      | -1.35(-4.26 to 1.55)                                                                                                                                                  | -5.72(-19.83 to 8.44)   | 2.68(-2.23 to 7.58)    | 9.42(-11.05 to 29.89) |
| LRYGB                                                                                                                                                           | 21.4(14.37 to 28.51)   | 1.35(-1.55 to 4.26)    | -                                                                                                                                                                     | -4.37(-18.78 to 10.08)  | 4.03(-1.17 to 9.24)    | 10.77(-9.9 to 31.44)  |
| BPD-DS                                                                                                                                                          | 25.76(9.88 to 41.58)   | 5.72(-8.44 to 19.83)   | 4.37(-10.08 to 18.78)                                                                                                                                                 | -                       | 8.39(-6.54 to 23.34)   | 15.14(0.35 to 29.95)  |
| LAGB                                                                                                                                                            | 17.38(8.87 to 25.92)   | -2.68(-7.58 to 2.23)   | -4.03(-9.24 to 1.17)                                                                                                                                                  | -8.39(-23.34 to 6.54)   | -                      | 6.75(-14.28 to 27.74) |
| Banded-GB                                                                                                                                                       | 10.63(-11.08 to 32.28) | -9.42(-29.89 to 11.05) | -10.77(-31.44 to 9.9)                                                                                                                                                 | -15.14(-29.95 to -0.35) | -6.75(-27.74 to 14.28) | -                     |
| MD >0 favors intervention in row; MD<0 favors intervention in column<br>MCID >5 marked green                                                                    |                        |                        |                                                                                                                                                                       |                         |                        |                       |
| HRQoL – health-related quality of life<br>LI – lifestyle intervention<br>LSG – laparoscopic sleeve gastrectomy<br>LRYGB – laparoscopic Roux-en-Y gastric bypass |                        |                        | LAGB - laparoscopic adjustable gastric banding<br>Banded-GB – banded Roux-en-Y gastric bypass<br>BPD-DS – laparoscopic biliopancreatic diversion with duodenal switch |                         |                        |                       |

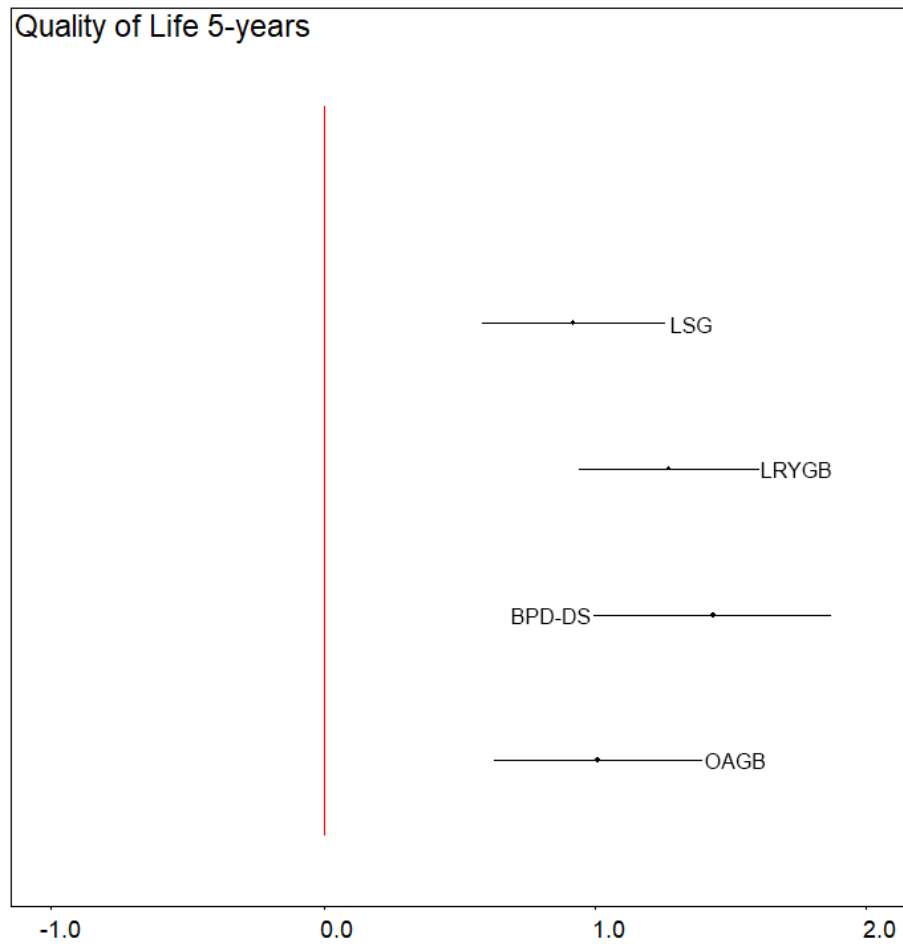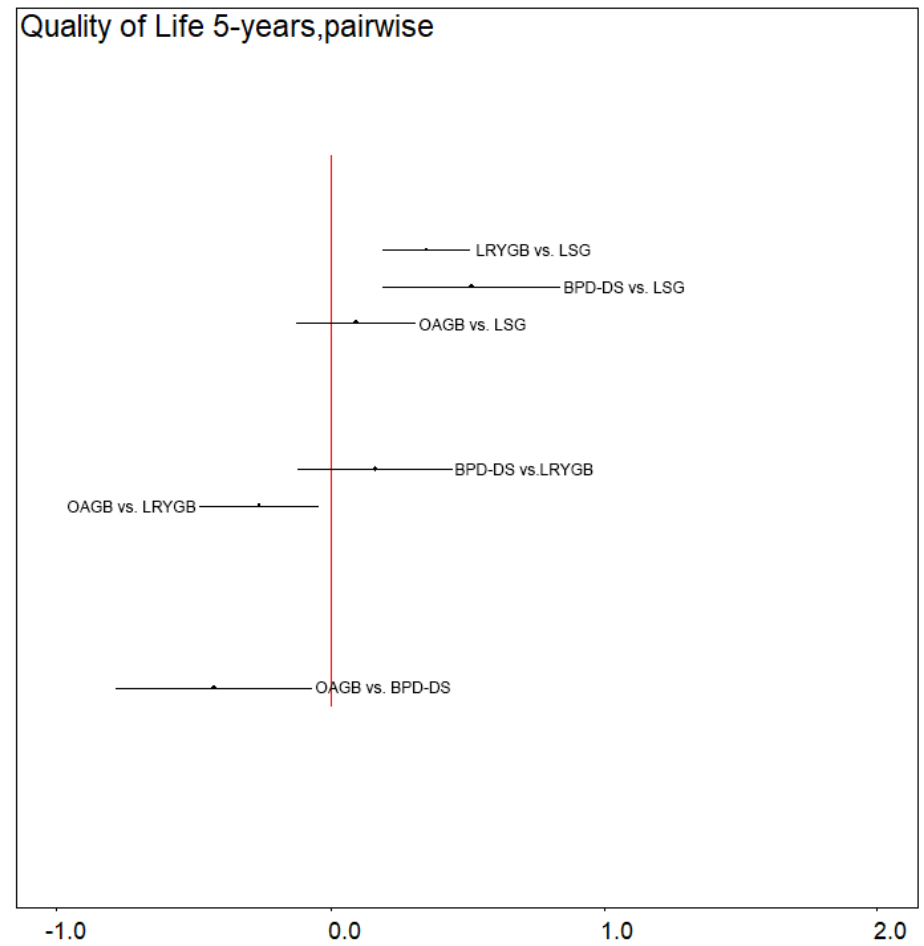

Pooled results of total HRQoL presented as SMD at 5 years a) in comparison to lifestyle intervention b) pairwise comparisons between surgeries

| <b>HRQoL after 5 years presented GIQLI scale (0-144)</b>                                                       |                       |                     |                                                                                                                                                                |                        |                    |
|----------------------------------------------------------------------------------------------------------------|-----------------------|---------------------|----------------------------------------------------------------------------------------------------------------------------------------------------------------|------------------------|--------------------|
|                                                                                                                | <b>LI</b>             | <b>LSG</b>          | <b>LRYGB</b>                                                                                                                                                   | <b>BPD-DS</b>          | <b>OAGB</b>        |
| <b>LSG</b>                                                                                                     | 11.83(7.53 to 16.18)  | -                   | -4.54(-6.61 to -2.46)                                                                                                                                          | -6.66(-10.86 to -2.46) | -1.19(-4 to 1.63)  |
| <b>LRYGB</b>                                                                                                   | 16.36(12.08 to 20.69) | 4.54(2.46 to 6.61)  | -                                                                                                                                                              | -2.12(-5.78 to 1.55)   | 3.35(0.53 to 6.17) |
| <b>BPD-DS</b>                                                                                                  | 17.49(12.85 to 24.15) | 6.66(2.46 to 10.86) | 2.12(-1.55 to 5.78)                                                                                                                                            | -                      | 5.47(0.86 to 10.1) |
| <b>OAGB</b>                                                                                                    | 13.01(8.11 to 17.98)  | 1.19(-1.63 to 4)    | -3.35(-6.17 to -0.53)                                                                                                                                          | -5.47(-10.1 to -0.86)  | -                  |
| MD >0 favors intervention in row; MD<0 favors intervention in column<br>MCID >5 marked green                   |                       |                     |                                                                                                                                                                |                        |                    |
| HRQoL – health-related quality of life<br>LI – lifestyle intervention<br>LSG – laparoscopic sleeve gastrectomy |                       |                     | BPD-DS – laparoscopic biliopancreatic diversion with duodenal switch<br>OAGB – one anastomosis gastric bypass<br>LRYGB – laparoscopic Roux-en-Y gastric bypass |                        |                    |
