# Supplementary material for: Quality of Life After Bariatric Surgery—a Systematic Review with Bayesian Network Meta-analysis
Source: Springer Nature journal article supplement (doi:10.1007/s11695-021-05687-1), 2021-10-11
Supplement: MOESM4 [file 19746444]

## **Table of contents**

|                                         |           |
|-----------------------------------------|-----------|
| <b>Total QoL 1 year .....</b>           | <b>2</b>  |
| <b>QoL 1-year physical .....</b>        | <b>5</b>  |
| <b>QoL 1-year emotional .....</b>       | <b>8</b>  |
| <b>QoL 1-year general health .....</b>  | <b>11</b> |
| <b>QoL 1-year vitality .....</b>        | <b>13</b> |
| <b>QoL 1-year physical role .....</b>   | <b>15</b> |
| <b>QoL 1-year social .....</b>          | <b>17</b> |
| <b>QoL 1-year mental.....</b>           | <b>20</b> |
| <b>QoL 1-year bodily pain .....</b>     | <b>22</b> |
| <b>Total QoL 2-years .....</b>          | <b>24</b> |
| <b>QoL 2-years physical.....</b>        | <b>27</b> |
| <b>QoL 2-years emotional.....</b>       | <b>30</b> |
| <b>QoL 2-years general health .....</b> | <b>32</b> |
| <b>QoL 2-years vitality .....</b>       | <b>34</b> |
| <b>QoL 2-years physical role .....</b>  | <b>36</b> |
| <b>QoL 2-years social .....</b>         | <b>38</b> |
| <b>QoL 2-years mental .....</b>         | <b>40</b> |
| <b>QoL 2-years bodily pain.....</b>     | <b>42</b> |
| <b>Total QoL 3-years .....</b>          | <b>44</b> |
| <b>Total QoL 5-years .....</b>          | <b>47</b> |

### Total QoL 1 year

22 studies

**Legend:**

- 1 LI
- 2 LSG
- 3 LRYGB
- 4 BPD-DS
- 5 VBG
- 6 LAGB
- 7 LGCP
- 8 OAGB
- 9 Distal OAGB

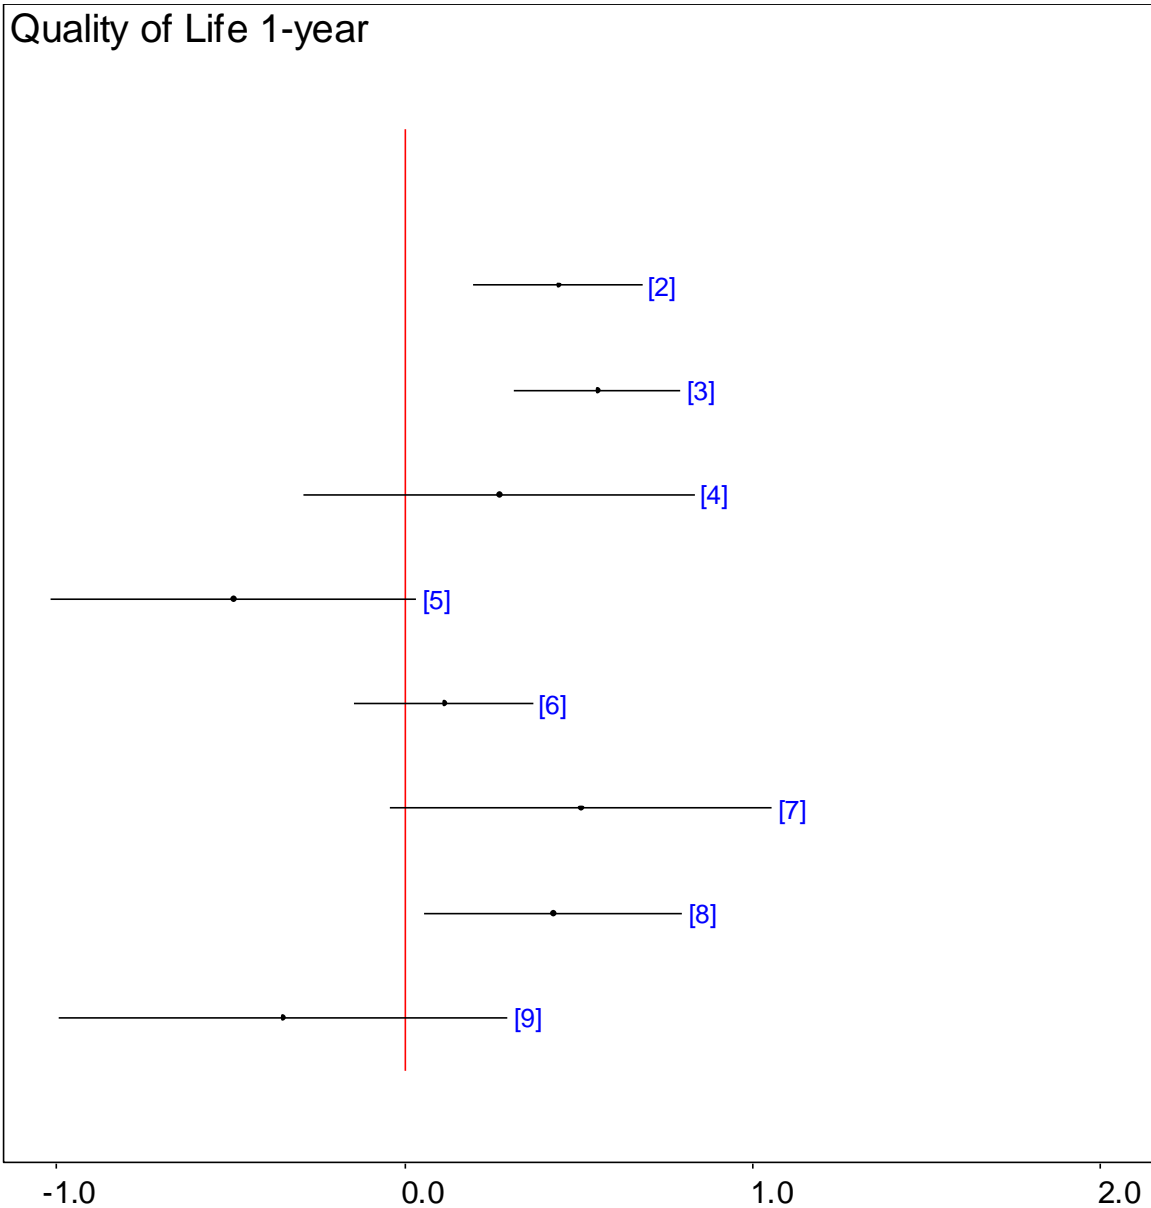

| node | mean | sd | MC error | 2.5% | median | 97.5% |
|------|------|----|----------|------|--------|-------|
|------|------|----|----------|------|--------|-------|

|           |         |        |          |          |         |         |
|-----------|---------|--------|----------|----------|---------|---------|
| d[2]      | 0.4443  | 0.1237 | 0.001649 | 0.2002   | 0.4451  | 0.684   |
| d[3]      | 0.5566  | 0.123  | 0.001635 | 0.3141   | 0.5572  | 0.7955  |
| d[4]      | 0.2723  | 0.2874 | 0.001708 | -0.2912  | 0.2728  | 0.8336  |
| d[5]      | -0.4902 | 0.269  | 0.001711 | -1.017   | -0.4901 | 0.03589 |
| d[6]      | 0.116   | 0.1306 | 0.001673 | -0.1418  | 0.1165  | 0.3696  |
| d[7]      | 0.5075  | 0.2802 | 0.001734 | -0.04188 | 0.5073  | 1.055   |
| d[8]      | 0.4275  | 0.189  | 0.001699 | 0.05596  | 0.4276  | 0.7978  |
| d[9]      | -0.3478 | 0.3286 | 0.001816 | -0.9926  | -0.3478 | 0.2959  |
| totresdev | 23.86   | 7.025  | 0.01287  | 12.14    | 23.18   | 39.5    |

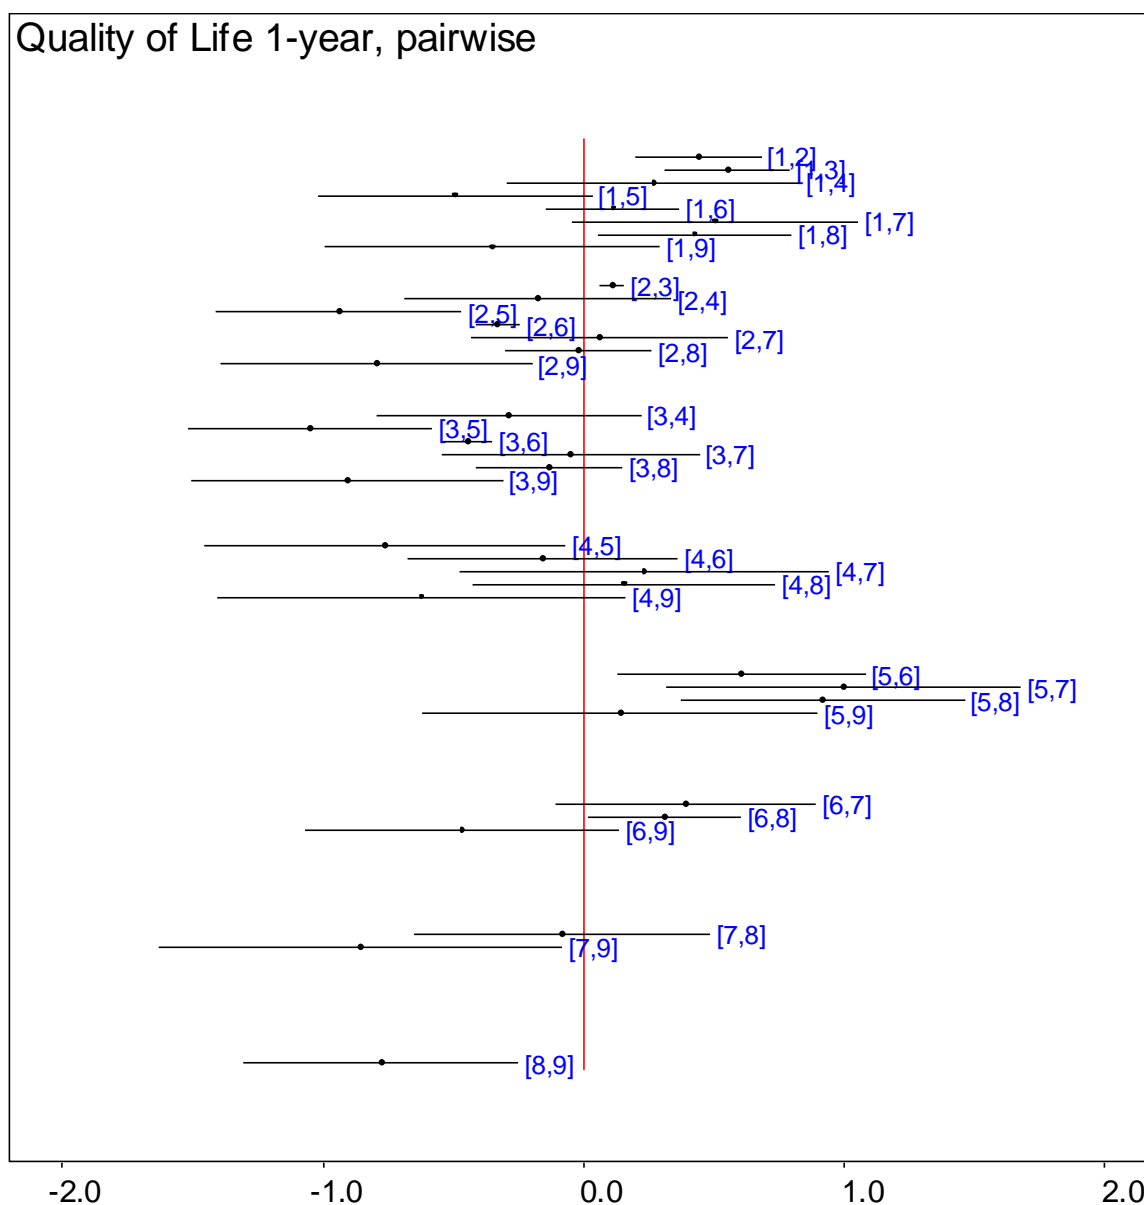

| node      | mean   | sd     | MC error | 2.5%   | median | 97.5%  |
|-----------|--------|--------|----------|--------|--------|--------|
| diff[1,2] | 0.4443 | 0.1237 | 0.001649 | 0.2002 | 0.4451 | 0.684  |
| diff[1,3] | 0.5566 | 0.123  | 0.001635 | 0.3141 | 0.5572 | 0.7955 |

|           |          |         |          |          |          |          |
|-----------|----------|---------|----------|----------|----------|----------|
| diff[1,4] | 0.2723   | 0.2874  | 0.001708 | -0.2912  | 0.2728   | 0.8336   |
| diff[1,5] | -0.4902  | 0.269   | 0.001711 | -1.017   | -0.4901  | 0.03589  |
| diff[1,6] | 0.116    | 0.1306  | 0.001673 | -0.1418  | 0.1165   | 0.3696   |
| diff[1,7] | 0.5075   | 0.2802  | 0.001734 | -0.04188 | 0.5073   | 1.055    |
| diff[1,8] | 0.4275   | 0.189   | 0.001699 | 0.05596  | 0.4276   | 0.7978   |
| diff[1,9] | -0.3478  | 0.3286  | 0.001816 | -0.9926  | -0.3478  | 0.2959   |
| diff[2,3] | 0.1123   | 0.02353 | 3.436E-5 | 0.06607  | 0.1122   | 0.1584   |
| diff[2,4] | -0.172   | 0.2609  | 4.35E-4  | -0.6845  | -0.1716  | 0.3371   |
| diff[2,5] | -0.9345  | 0.2401  | 4.065E-4 | -1.407   | -0.9341  | -0.4653  |
| diff[2,6] | -0.3284  | 0.04306 | 7.293E-5 | -0.4126  | -0.3283  | -0.244   |
| diff[2,7] | 0.06321  | 0.2513  | 4.307E-4 | -0.4296  | 0.06307  | 0.5578   |
| diff[2,8] | -0.01682 | 0.1434  | 2.979E-4 | -0.2984  | -0.01674 | 0.2643   |
| diff[2,9] | -0.7921  | 0.3044  | 6.255E-4 | -1.39    | -0.7921  | -0.1959  |
| diff[3,4] | -0.2843  | 0.2598  | 4.33E-4  | -0.7944  | -0.2837  | 0.2228   |
| diff[3,5] | -1.047   | 0.2389  | 4.035E-4 | -1.517   | -1.047   | -0.5797  |
| diff[3,6] | -0.4406  | 0.04739 | 8.713E-5 | -0.5333  | -0.4407  | -0.3478  |
| diff[3,7] | -0.04907 | 0.2523  | 4.333E-4 | -0.5435  | -0.04921 | 0.4469   |
| diff[3,8] | -0.1291  | 0.1438  | 3.007E-4 | -0.4116  | -0.1291  | 0.1528   |
| diff[3,9] | -0.9044  | 0.3046  | 6.291E-4 | -1.503   | -0.9043  | -0.3073  |
| diff[4,5] | -0.7625  | 0.3534  | 5.999E-4 | -1.454   | -0.763   | -0.06941 |
| diff[4,6] | -0.1563  | 0.2641  | 4.455E-4 | -0.6724  | -0.157   | 0.3614   |
| diff[4,7] | 0.2352   | 0.3618  | 5.998E-4 | -0.4726  | 0.2357   | 0.9451   |
| diff[4,8] | 0.1552   | 0.2968  | 5.276E-4 | -0.4249  | 0.1549   | 0.7377   |
| diff[4,9] | -0.6201  | 0.4002  | 7.805E-4 | -1.406   | -0.6201  | 0.1654   |
| diff[5,6] | 0.6062   | 0.2436  | 4.119E-4 | 0.1296   | 0.6062   | 1.084    |
| diff[5,7] | 0.9977   | 0.3474  | 5.961E-4 | 0.3167   | 0.9977   | 1.679    |
| diff[5,8] | 0.9177   | 0.2788  | 4.93E-4  | 0.3734   | 0.9172   | 1.465    |
| diff[5,9] | 0.1424   | 0.3875  | 7.366E-4 | -0.6163  | 0.1423   | 0.9019   |
| diff[6,7] | 0.3916   | 0.255   | 4.417E-4 | -0.108   | 0.3914   | 0.8933   |
| diff[6,8] | 0.3115   | 0.1495  | 3.079E-4 | 0.01743  | 0.3114   | 0.6043   |
| diff[6,9] | -0.4638  | 0.3073  | 6.315E-4 | -1.067   | -0.4641  | 0.1379   |
| diff[7,8] | -0.08002 | 0.2889  | 5.235E-4 | -0.6474  | -0.08071 | 0.4864   |
| diff[7,9] | -0.8553  | 0.3946  | 7.569E-4 | -1.627   | -0.8551  | -0.07992 |
| diff[8,9] | -0.7753  | 0.2685  | 4.386E-4 | -1.304   | -0.7748  | -0.2474  |

## QoL 1-year physical

10 studies

Legend:

- 1 LI
- 2 LSG
- 3 LRYGB
- 4 BPD-DS
- 5 LAGB
- 6 LGCP
- 7 OAGB

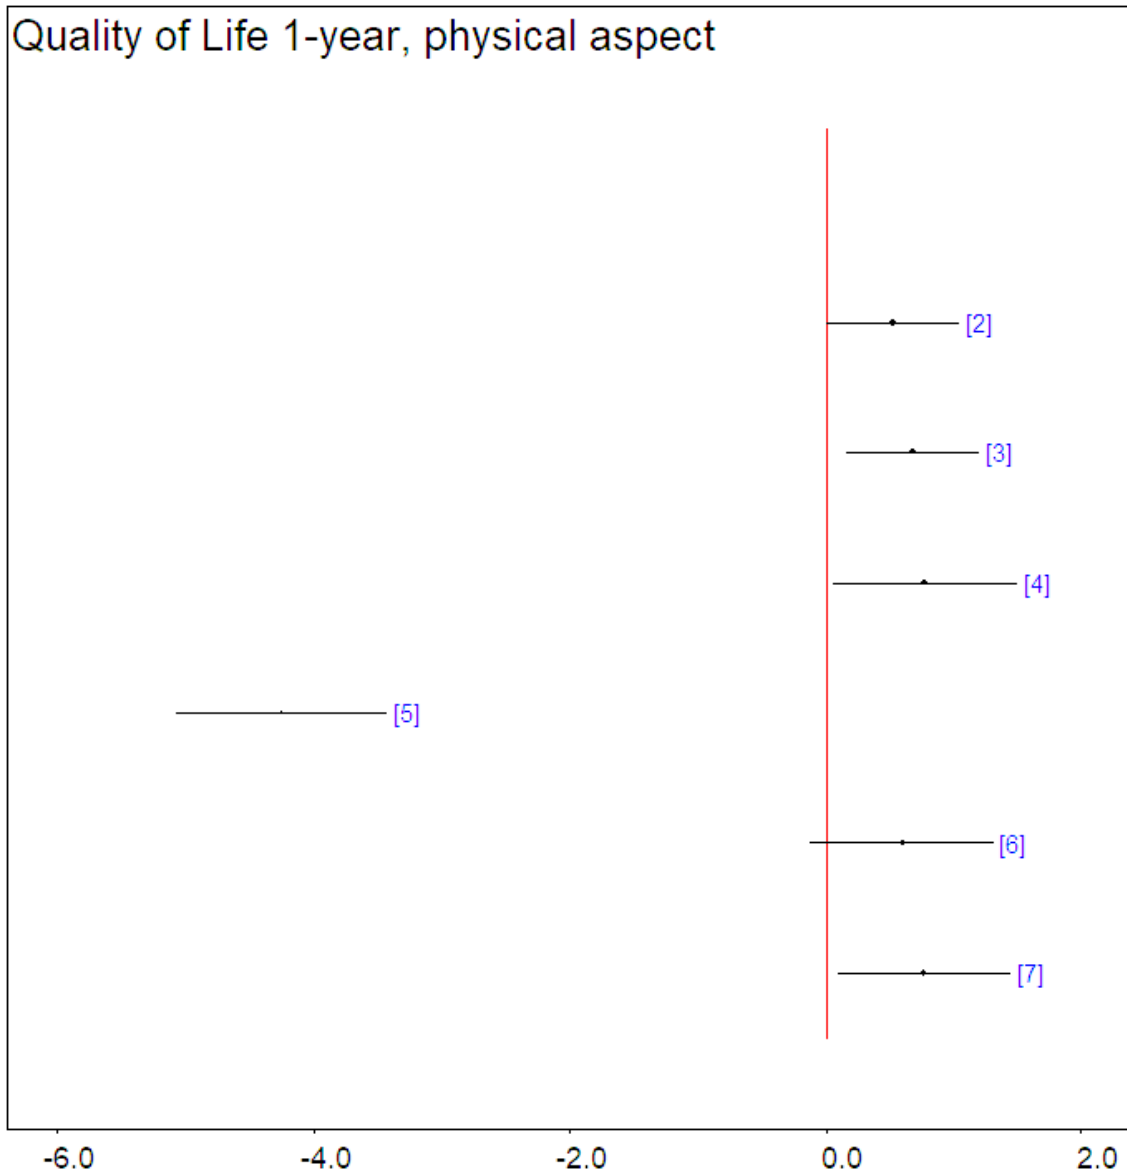

| node | mean   | sd     | MC error | 2.5%     | median | 97.5%  |
|------|--------|--------|----------|----------|--------|--------|
| d[2] | 0.5272 | 0.2654 | 0.001323 | 0.007936 | 0.5266 | 1.047  |
| d[3] | 0.6814 | 0.2636 | 0.001315 | 0.1662   | 0.6811 | 1.198  |
| d[4] | 0.7755 | 0.3685 | 0.001506 | 0.05266  | 0.7761 | 1.497  |
| d[5] | -4.247 | 0.4174 | 0.001561 | -5.067   | -4.247 | -3.428 |
| d[6] | 0.601  | 0.3658 | 0.00151  | -0.1171  | 0.6011 | 1.317  |
| d[7] | 0.77   | 0.3459 | 0.001479 | 0.09315  | 0.7698 | 1.447  |

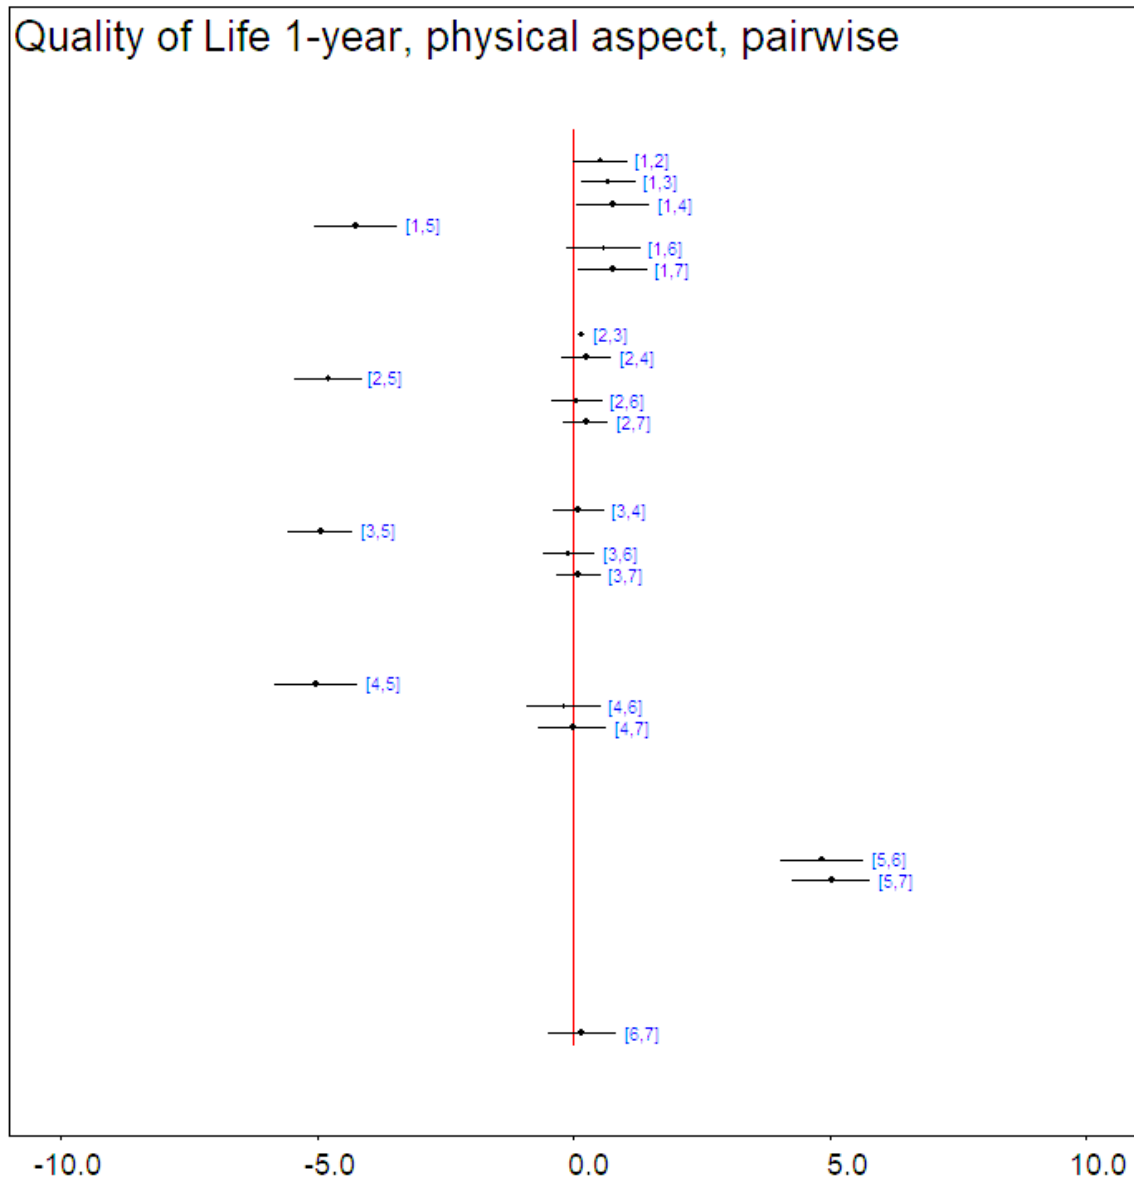

| node      | mean     | sd      | MC error | 2.5%     | median   | 97.5%  |
|-----------|----------|---------|----------|----------|----------|--------|
| diff[1,2] | 0.5272   | 0.2654  | 0.001323 | 0.007936 | 0.5266   | 1.047  |
| diff[1,3] | 0.6814   | 0.2636  | 0.001315 | 0.1662   | 0.6811   | 1.198  |
| diff[1,4] | 0.7755   | 0.3685  | 0.001506 | 0.05266  | 0.7761   | 1.497  |
| diff[1,5] | -4.247   | 0.4174  | 0.001561 | -5.067   | -4.247   | -3.428 |
| diff[1,6] | 0.601    | 0.3658  | 0.00151  | -0.1171  | 0.6011   | 1.317  |
| diff[1,7] | 0.77     | 0.3459  | 0.001479 | 0.09315  | 0.7698   | 1.447  |
| diff[2,3] | 0.1542   | 0.03014 | 5.166E-5 | 0.09524  | 0.1541   | 0.2133 |
| diff[2,4] | 0.2483   | 0.2599  | 4.454E-4 | -0.2605  | 0.2484   | 0.7598 |
| diff[2,5] | -4.774   | 0.3251  | 5.393E-4 | -5.413   | -4.774   | -4.137 |
| diff[2,6] | 0.07379  | 0.2517  | 4.109E-4 | -0.4221  | 0.0743   | 0.5687 |
| diff[2,7] | 0.2428   | 0.2256  | 3.712E-4 | -0.1996  | 0.2431   | 0.6847 |
| diff[3,4] | 0.09415  | 0.2582  | 4.421E-4 | -0.4122  | 0.09401  | 0.6024 |
| diff[3,5] | -4.928   | 0.3237  | 5.39E-4  | -5.564   | -4.928   | -4.294 |
| diff[3,6] | -0.08037 | 0.2534  | 4.206E-4 | -0.5786  | -0.08011 | 0.4177 |
| diff[3,7] | 0.08859  | 0.2237  | 3.702E-4 | -0.3496  | 0.08874  | 0.5265 |

|           |           |        |          |         |           |        |
|-----------|-----------|--------|----------|---------|-----------|--------|
| diff[4,5] | -5.022    | 0.4136 | 6.969E-4 | -5.834  | -5.022    | -4.211 |
| diff[4,6] | -0.1745   | 0.3621 | 6.067E-4 | -0.8835 | -0.1743   | 0.5376 |
| diff[4,7] | -0.005558 | 0.3411 | 5.81E-4  | -0.6737 | -0.005835 | 0.6625 |
| diff[5,6] | 4.848     | 0.4111 | 6.77E-4  | 4.043   | 4.847     | 5.655  |
| diff[5,7] | 5.017     | 0.3935 | 6.483E-4 | 4.245   | 5.017     | 5.788  |
| diff[6,7] | 0.169     | 0.3385 | 5.609E-4 | -0.4964 | 0.1693    | 0.8325 |

## Qol 1-year emotional

9 studies

Legend:

- 1 LI
- 2 LSG
- 3 LRYGB
- 4 BPD-DS
- 5 LAGB
- 6 LGCP
- 7 OAGB

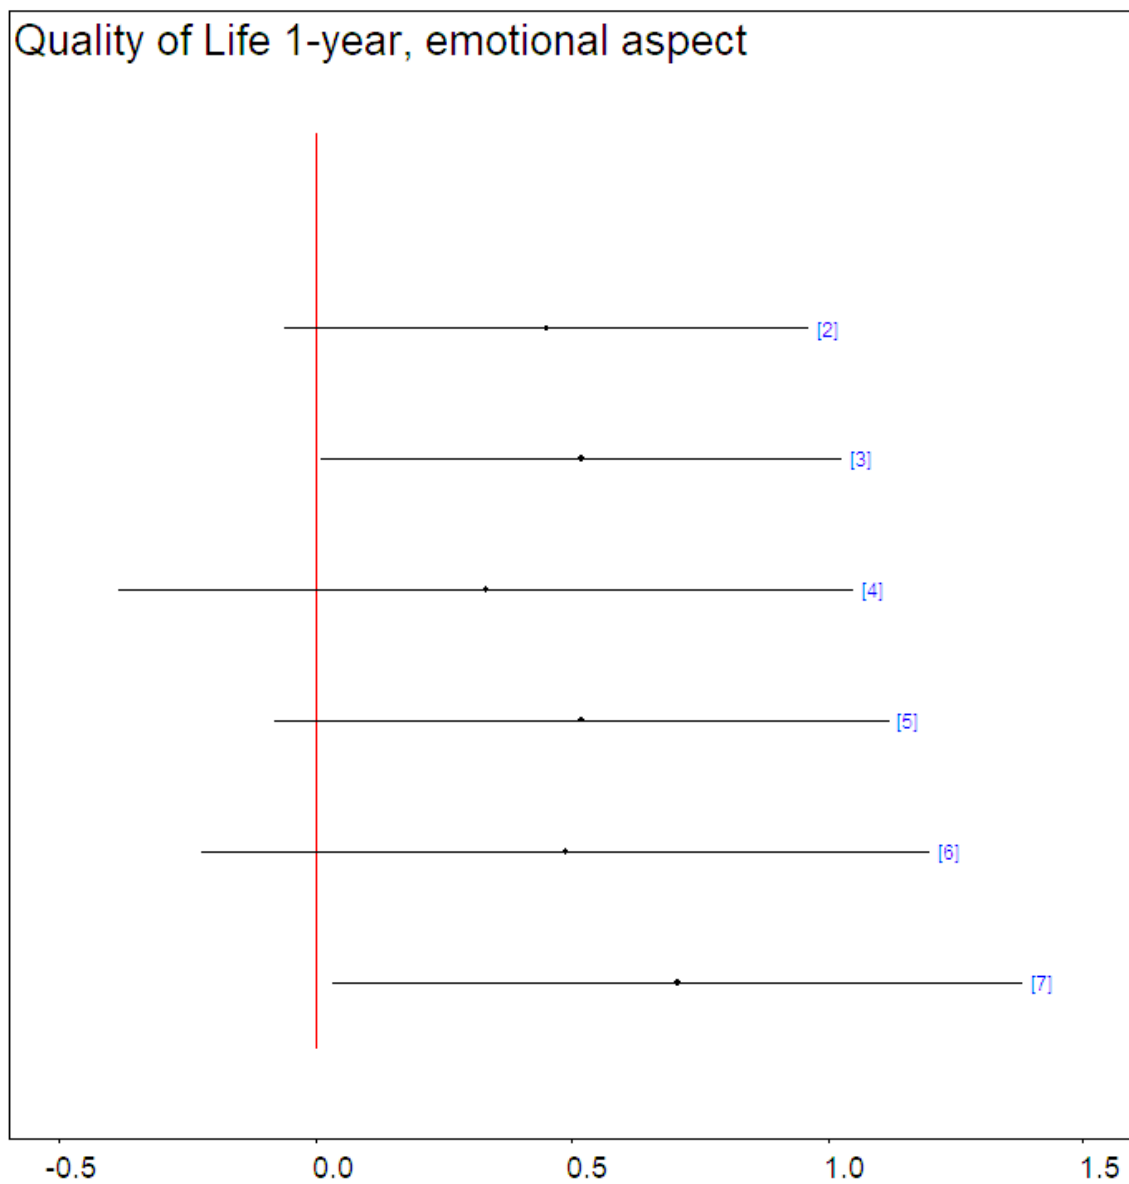

| node | mean   | sd     | MC error | 2.5%     | median | 97.5%  |
|------|--------|--------|----------|----------|--------|--------|
| d[2] | 0.4499 | 0.2624 | 0.001548 | -0.06173 | 0.4498 | 0.9645 |
| d[3] | 0.519  | 0.2606 | 0.001541 | 0.009829 | 0.5188 | 1.03   |



|      |        |        |          |          |        |       |
|------|--------|--------|----------|----------|--------|-------|
| d[4] | 0.3326 | 0.3667 | 0.001701 | -0.3853  | 0.3325 | 1.052 |
| d[5] | 0.5186 | 0.3073 | 0.001684 | -0.08157 | 0.5181 | 1.121 |
| d[6] | 0.4884 | 0.3636 | 0.001708 | -0.2248  | 0.4882 | 1.201 |
| d[7] | 0.7056 | 0.3439 | 0.001679 | 0.03247  | 0.7055 | 1.381 |

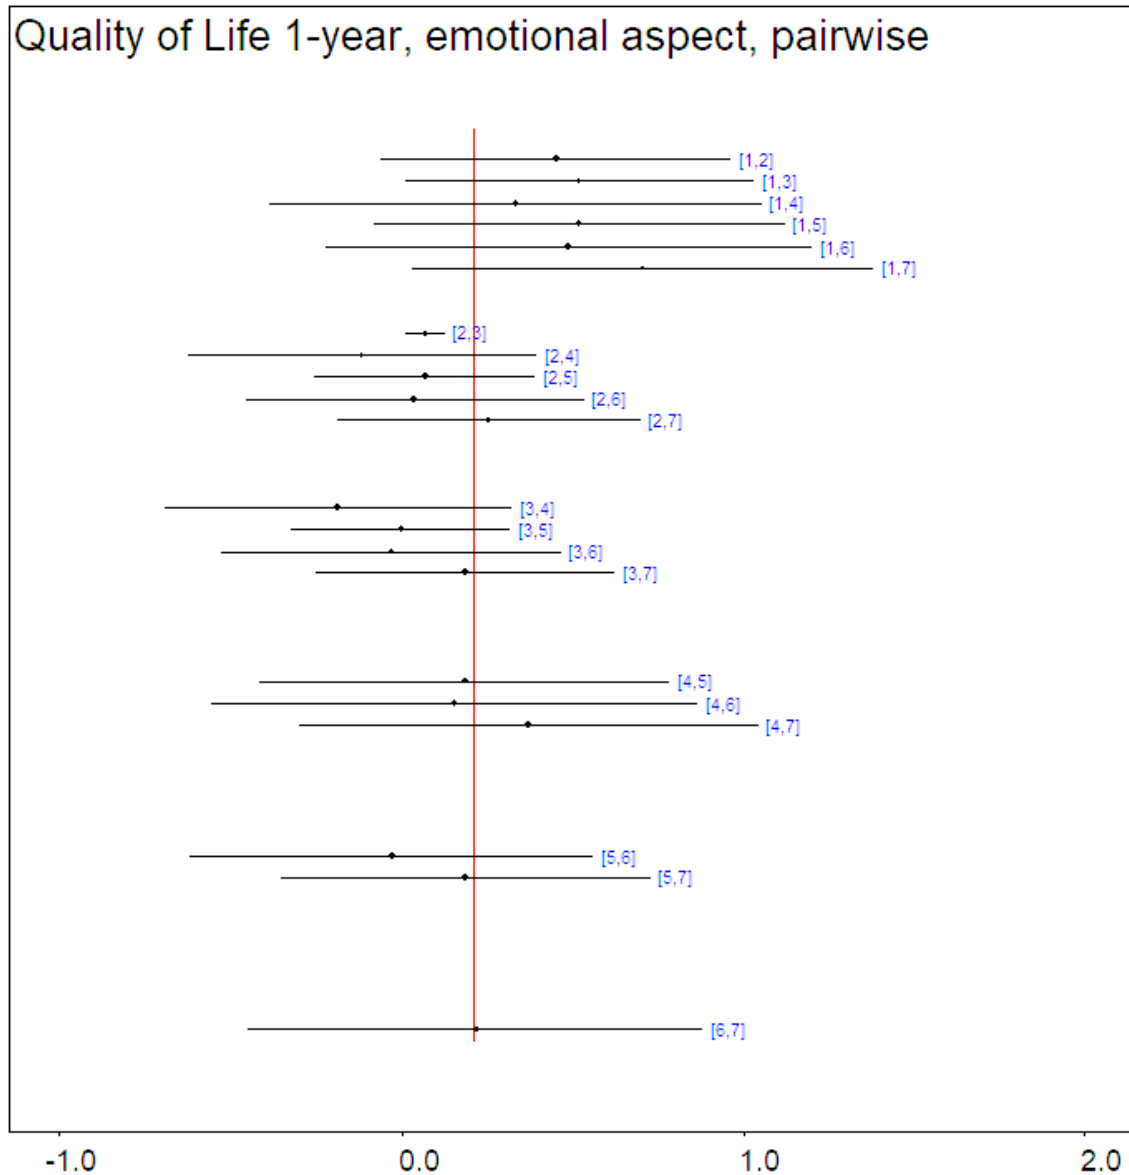

| node      | mean    | sd     | MC error | 2.5%     | median  | 97.5%  |
|-----------|---------|--------|----------|----------|---------|--------|
| diff[1,2] | 0.4499  | 0.2624 | 0.001548 | -0.06173 | 0.4498  | 0.9645 |
| diff[1,3] | 0.519   | 0.2606 | 0.001541 | 0.009829 | 0.5188  | 1.03   |
| diff[1,4] | 0.3326  | 0.3667 | 0.001701 | -0.3853  | 0.3325  | 1.052  |
| diff[1,5] | 0.5186  | 0.3073 | 0.001684 | -0.08157 | 0.5181  | 1.121  |
| diff[1,6] | 0.4884  | 0.3636 | 0.001708 | -0.2248  | 0.4882  | 1.201  |
| diff[1,7] | 0.7056  | 0.3439 | 0.001679 | 0.03247  | 0.7055  | 1.381  |
| diff[2,3] | 0.06908 | 0.0303 | 5.194E-5 | 0.009818 | 0.06904 | 0.1286 |
| diff[2,4] | -0.1173 | 0.2604 | 4.462E-4 | -0.6271  | -0.1173 | 0.395  |
| diff[2,5] | 0.06871 | 0.1656 | 2.739E-4 | -0.2567  | 0.06883 | 0.393  |
| diff[2,6] | 0.03852 | 0.2517 | 4.108E-4 | -0.4572  | 0.03902 | 0.5333 |

|           |           |        |          |         |          |        |
|-----------|-----------|--------|----------|---------|----------|--------|
| diff[2,7] | 0.2557    | 0.226  | 3.718E-4 | -0.1875 | 0.256    | 0.6985 |
| diff[3,4] | -0.1864   | 0.2586 | 4.429E-4 | -0.6936 | -0.1866  | 0.3227 |
| diff[3,5] | -3.616E-4 | 0.1628 | 2.711E-4 | -0.32   | -1.04E-4 | 0.3185 |
| diff[3,6] | -0.03056  | 0.2534 | 4.206E-4 | -0.5286 | -0.03028 | 0.4673 |
| diff[3,7] | 0.1866    | 0.2241 | 3.709E-4 | -0.2524 | 0.1867   | 0.6253 |
| diff[4,5] | 0.1861    | 0.3053 | 5.191E-4 | -0.4145 | 0.1856   | 0.7847 |
| diff[4,6] | 0.1559    | 0.3623 | 6.072E-4 | -0.5537 | 0.156    | 0.8684 |
| diff[4,7] | 0.373     | 0.3416 | 5.82E-4  | -0.2963 | 0.3727   | 1.042  |
| diff[5,6] | -0.03019  | 0.3012 | 4.958E-4 | -0.6218 | -0.03035 | 0.5588 |
| diff[5,7] | 0.1869    | 0.2769 | 4.553E-4 | -0.3557 | 0.1867   | 0.7294 |
| diff[6,7] | 0.2171    | 0.3387 | 5.613E-4 | -0.4486 | 0.2175   | 0.8812 |

## QoL 1-year general health

8 studies

Legend:

- 1 LI
- 2 LSG
- 3 LRYGB
- 4 BPD-DS
- 5 LAGB
- 6 OAGB

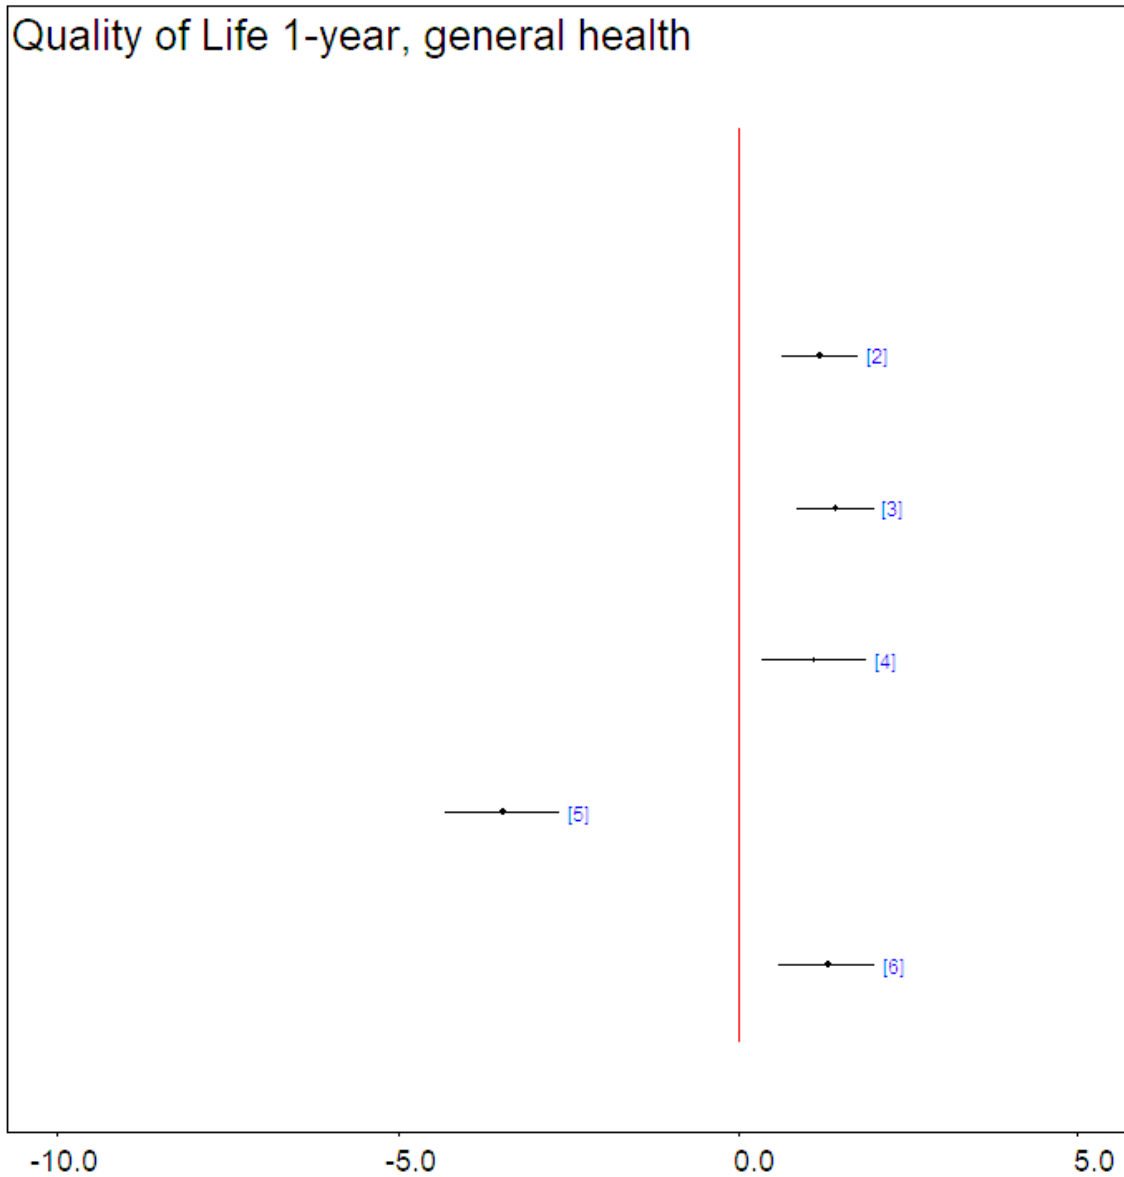

| node | mean   | sd     | MC error | 2.5%   | median | 97.5%  |
|------|--------|--------|----------|--------|--------|--------|
| d[2] | 1.199  | 0.2911 | 0.001457 | 0.6263 | 1.2    | 1.767  |
| d[3] | 1.436  | 0.2894 | 0.001459 | 0.866  | 1.437  | 2.0    |
| d[4] | 1.115  | 0.3891 | 0.001685 | 0.3491 | 1.117  | 1.875  |
| d[5] | -3.452 | 0.4314 | 0.001738 | -4.297 | -3.451 | -2.607 |
| d[6] | 1.311  | 0.3659 | 0.001656 | 0.5918 | 1.313  | 2.027  |

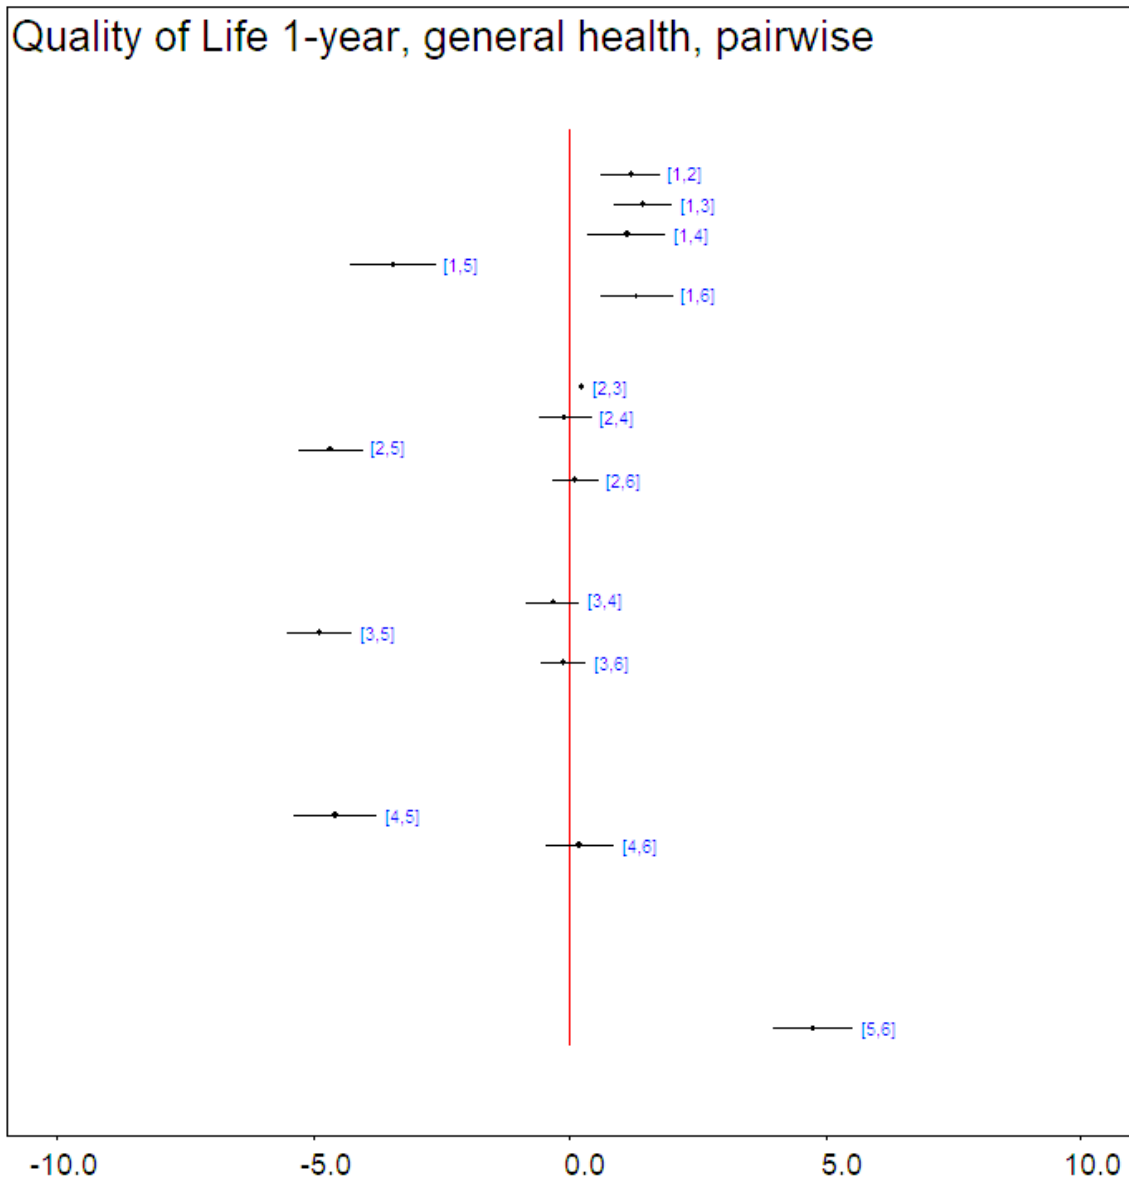

| node      | mean     | sd      | MC error | 2.5%    | median   | 97.5%  |
|-----------|----------|---------|----------|---------|----------|--------|
| diff[1,2] | 1.199    | 0.2911  | 0.001457 | 0.6263  | 1.2      | 1.767  |
| diff[1,3] | 1.436    | 0.2894  | 0.001459 | 0.866   | 1.437    | 2.0    |
| diff[1,4] | 1.115    | 0.3891  | 0.001685 | 0.3491  | 1.117    | 1.875  |
| diff[1,5] | -3.452   | 0.4314  | 0.001738 | -4.297  | -3.451   | -2.607 |
| diff[1,6] | 1.311    | 0.3659  | 0.001656 | 0.5918  | 1.313    | 2.027  |
| diff[2,3] | 0.2364   | 0.03042 | 5.083E-5 | 0.177   | 0.2364   | 0.2962 |
| diff[2,4] | -0.08415 | 0.2616  | 4.368E-4 | -0.598  | -0.08363 | 0.4293 |
| diff[2,5] | -4.651   | 0.3217  | 5.561E-4 | -5.283  | -4.651   | -4.023 |
| diff[2,6] | 0.1119   | 0.2264  | 3.751E-4 | -0.3315 | 0.1123   | 0.5554 |
| diff[3,4] | -0.3205  | 0.2598  | 4.321E-4 | -0.8313 | -0.3201  | 0.1883 |
| diff[3,5] | -4.888   | 0.3202  | 5.554E-4 | -5.517  | -4.887   | -4.261 |
| diff[3,6] | -0.1245  | 0.2243  | 3.701E-4 | -0.5637 | -0.1239  | 0.3153 |
| diff[4,5] | -4.567   | 0.4127  | 6.923E-4 | -5.377  | -4.567   | -3.76  |
| diff[4,6] | 0.1961   | 0.3435  | 5.588E-4 | -0.4774 | 0.1961   | 0.87   |

|           |       |        |          |       |       |       |
|-----------|-------|--------|----------|-------|-------|-------|
| diff[5,6] | 4.763 | 0.3914 | 6.639E-4 | 3.998 | 4.763 | 5.534 |
|-----------|-------|--------|----------|-------|-------|-------|

## QoL 1-year vitality

7 studies

Legend:

- 1 LI
- 2 LSG
- 3 LRYGB
- 4 BPD-DS
- 5 LAGB

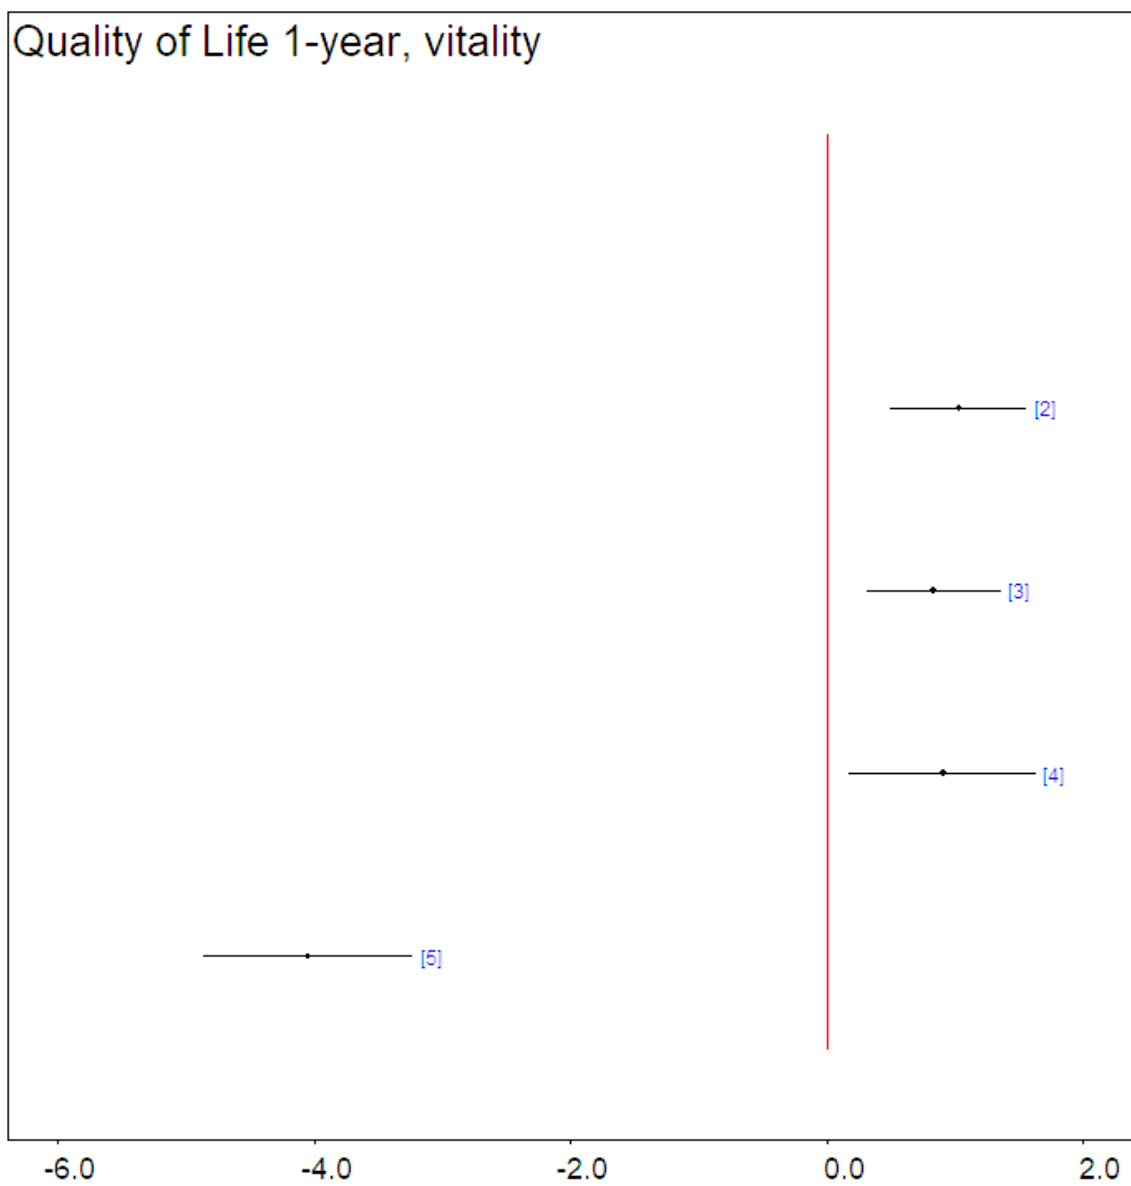

| node | mean   | sd     | MC error | 2.5%   | median | 97.5% |
|------|--------|--------|----------|--------|--------|-------|
| d[2] | 1.023  | 0.2694 | 9.449E-4 | 0.4944 | 1.023  | 1.553 |
| d[3] | 0.8329 | 0.2676 | 9.416E-4 | 0.3079 | 0.8329 | 1.358 |

|      |        |        |          |        |        |        |
|------|--------|--------|----------|--------|--------|--------|
| d[4] | 0.8987 | 0.3715 | 0.001216 | 0.1711 | 0.8988 | 1.627  |
| d[5] | -4.055 | 0.4185 | 0.001262 | -4.875 | -4.054 | -3.237 |

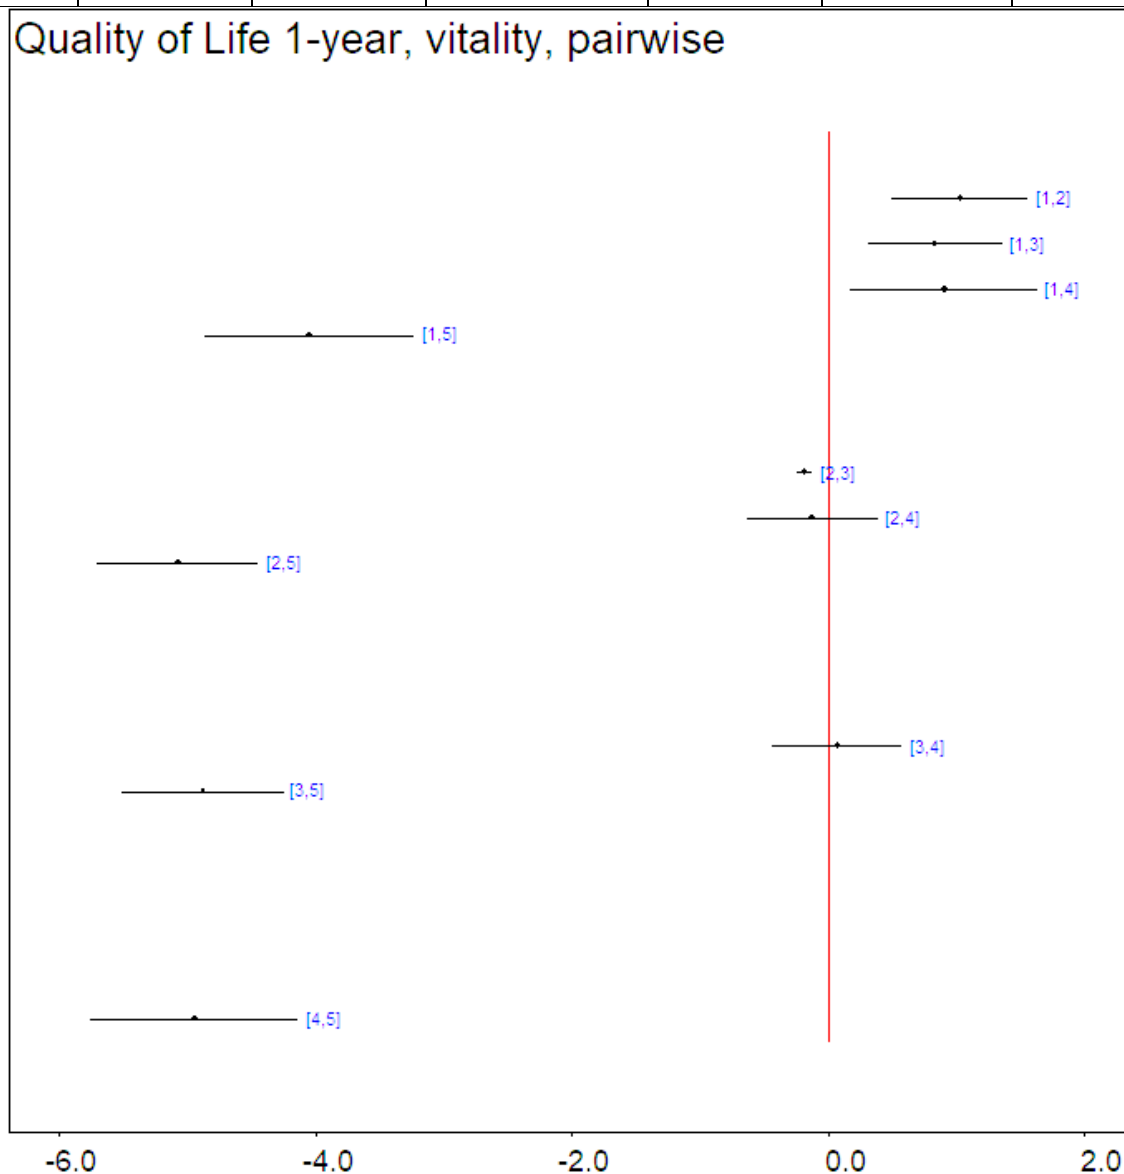

| node      | mean    | sd      | MC error | 2.5%    | median  | 97.5%   |
|-----------|---------|---------|----------|---------|---------|---------|
| diff[1,2] | 1.023   | 0.2694  | 9.449E-4 | 0.4944  | 1.023   | 1.553   |
| diff[1,3] | 0.8329  | 0.2676  | 9.416E-4 | 0.3079  | 0.8329  | 1.358   |
| diff[1,4] | 0.8987  | 0.3715  | 0.001216 | 0.1711  | 0.8988  | 1.627   |
| diff[1,5] | -4.055  | 0.4185  | 0.001262 | -4.875  | -4.054  | -3.237  |
| diff[2,3] | -0.1903 | 0.03078 | 5.134E-5 | -0.2508 | -0.1903 | -0.1301 |
| diff[2,4] | -0.1245 | 0.2599  | 4.404E-4 | -0.6337 | -0.1242 | 0.3861  |
| diff[2,5] | -5.078  | 0.3226  | 5.456E-4 | -5.71   | -5.078  | -4.448  |
| diff[3,4] | 0.06583 | 0.2581  | 4.405E-4 | -0.4407 | 0.06619 | 0.5725  |
| diff[3,5] | -4.888  | 0.3211  | 5.445E-4 | -5.518  | -4.888  | -4.26   |
| diff[4,5] | -4.954  | 0.4124  | 7.081E-4 | -5.763  | -4.953  | -4.143  |

## QoL 1-year physical role

7 studies

Legend:

- 1 Lifestyle Intervention
- 2 LSG
- 3 LRYGB
- 4 Laparoscopic BPD-DS.

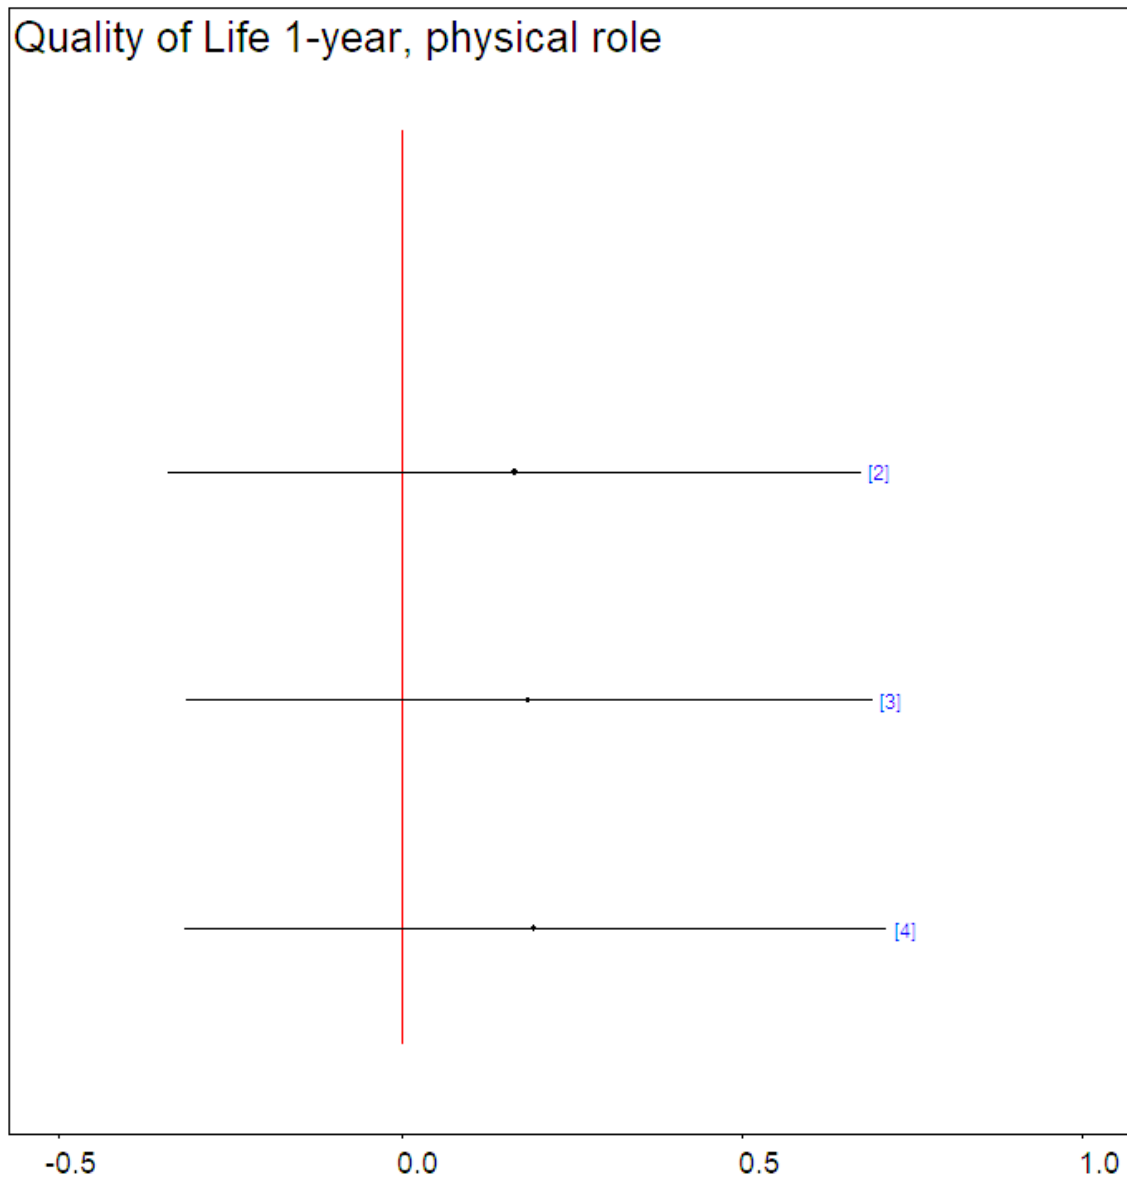

| node | mean   | sd     | MC error | 2.5%    | median | 97.5%  |
|------|--------|--------|----------|---------|--------|--------|
| d[2] | 0.166  | 0.2581 | 0.002594 | -0.3395 | 0.165  | 0.6738 |
| d[3] | 0.1867 | 0.2558 | 0.002592 | -0.3133 | 0.186  | 0.6908 |
| d[4] | 0.1953 | 0.2622 | 0.002657 | -0.3175 | 0.1946 | 0.7116 |

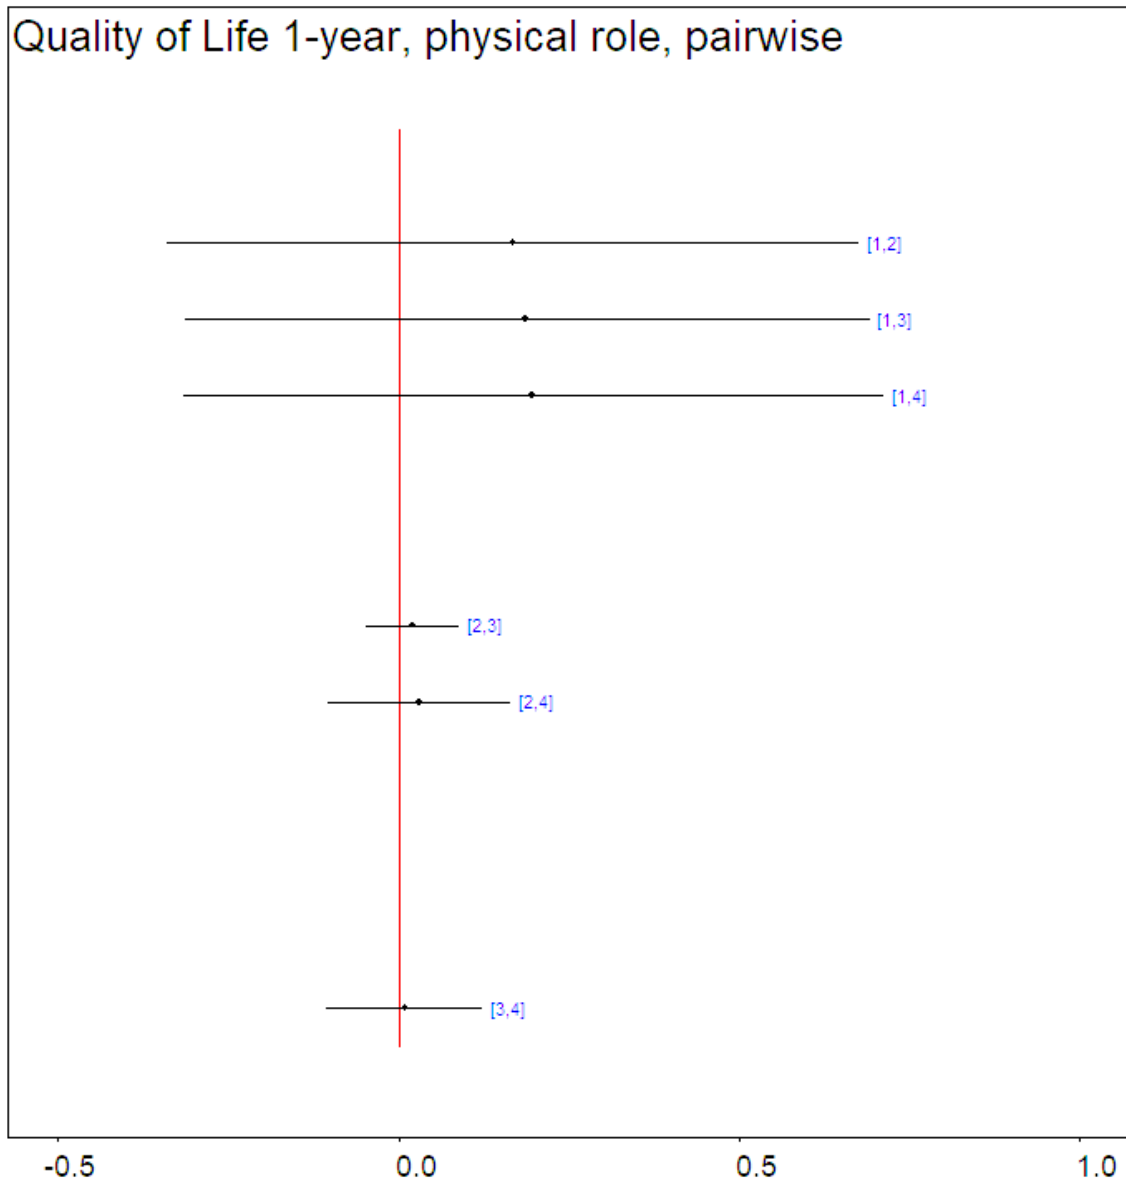

| node      | mean     | sd      | MC error | 2.5%     | median   | 97.5%   |
|-----------|----------|---------|----------|----------|----------|---------|
| diff[1,2] | 0.166    | 0.2581  | 0.002594 | -0.3395  | 0.165    | 0.6738  |
| diff[1,3] | 0.1867   | 0.2558  | 0.002592 | -0.3133  | 0.186    | 0.6908  |
| diff[1,4] | 0.1953   | 0.2622  | 0.002657 | -0.3175  | 0.1946   | 0.7116  |
| diff[2,3] | 0.02076  | 0.03479 | 5.869E-5 | -0.04733 | 0.02068  | 0.08897 |
| diff[2,4] | 0.0293   | 0.06815 | 1.134E-4 | -0.1041  | 0.0294   | 0.1627  |
| diff[3,4] | 0.008535 | 0.05857 | 9.795E-5 | -0.1062  | 0.008548 | 0.1233  |



## QoL 1-year social

9 studies

Legend:

- 1 LI
- 2 LSG
- 3 LRYGB
- 4 BPD-DS
- 5 LGCP
- 6 OAGB

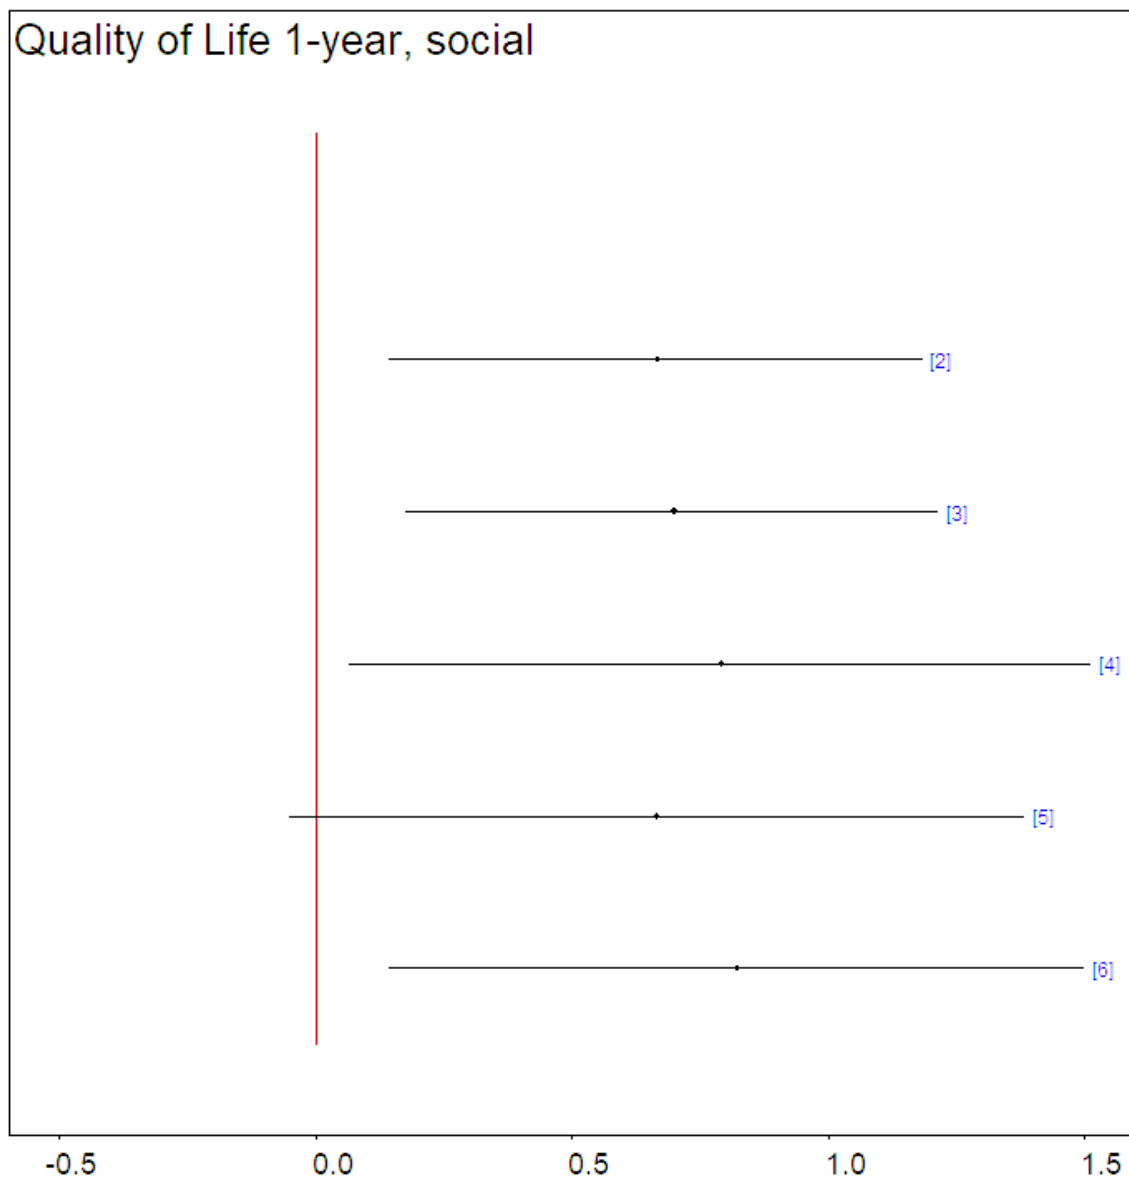

| node | mean   | sd     | MC error | 2.5%     | median | 97.5% |
|------|--------|--------|----------|----------|--------|-------|
| d[2] | 0.6654 | 0.2662 | 0.001309 | 0.1415   | 0.6666 | 1.184 |
| d[3] | 0.6964 | 0.2645 | 0.001306 | 0.1758   | 0.6976 | 1.213 |
| d[4] | 0.7913 | 0.3697 | 0.001526 | 0.06337  | 0.7926 | 1.513 |
| d[5] | 0.6648 | 0.3658 | 0.001544 | -0.05115 | 0.665  | 1.381 |

|      |        |        |          |        |       |     |
|------|--------|--------|----------|--------|-------|-----|
| d[6] | 0.8224 | 0.3465 | 0.001497 | 0.1419 | 0.824 | 1.5 |
|------|--------|--------|----------|--------|-------|-----|

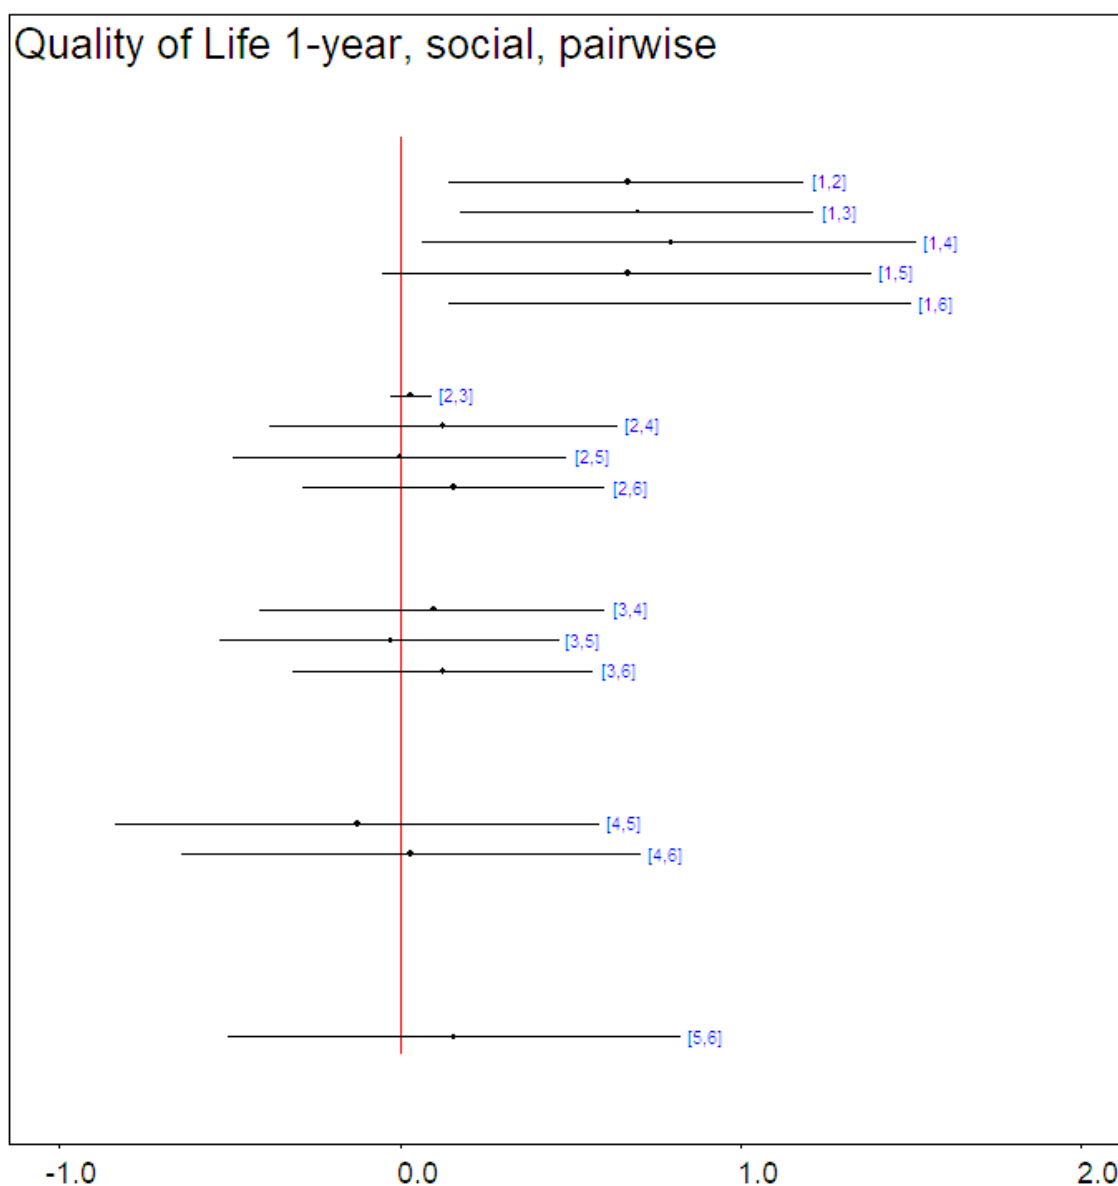

| node      | mean      | sd      | MC error | 2.5%     | median    | 97.5%   |
|-----------|-----------|---------|----------|----------|-----------|---------|
| diff[1,2] | 0.6654    | 0.2662  | 0.001309 | 0.1415   | 0.6666    | 1.184   |
| diff[1,3] | 0.6964    | 0.2645  | 0.001306 | 0.1758   | 0.6976    | 1.213   |
| diff[1,4] | 0.7913    | 0.3697  | 0.001526 | 0.06337  | 0.7926    | 1.513   |
| diff[1,5] | 0.6648    | 0.3658  | 0.001544 | -0.05115 | 0.665     | 1.381   |
| diff[1,6] | 0.8224    | 0.3465  | 0.001497 | 0.1419   | 0.824     | 1.5     |
| diff[2,3] | 0.03099   | 0.03018 | 5.138E-5 | -0.028   | 0.03092   | 0.09019 |
| diff[2,4] | 0.1259    | 0.26    | 4.34E-4  | -0.3849  | 0.1264    | 0.6364  |
| diff[2,5] | -5.959E-4 | 0.2512  | 4.356E-4 | -0.4938  | -2.579E-4 | 0.4907  |
| diff[2,6] | 0.157     | 0.2264  | 3.751E-4 | -0.2868  | 0.1573    | 0.6004  |
| diff[3,4] | 0.09489   | 0.2582  | 4.295E-4 | -0.4127  | 0.09531   | 0.6006  |
| diff[3,5] | -0.03158  | 0.253   | 4.464E-4 | -0.5289  | -0.03144  | 0.4637  |

|           |         |        |          |         |         |        |
|-----------|---------|--------|----------|---------|---------|--------|
| diff[3,6] | 0.126   | 0.2243 | 3.701E-4 | -0.3133 | 0.1266  | 0.5658 |
| diff[4,5] | -0.1265 | 0.3618 | 6.104E-4 | -0.8363 | -0.1263 | 0.5834 |
| diff[4,6] | 0.03113 | 0.3423 | 5.568E-4 | -0.64   | 0.03109 | 0.7025 |
| diff[5,6] | 0.1576  | 0.3385 | 5.776E-4 | -0.5048 | 0.1572  | 0.8217 |

## QoL 1-year mental

7 studies

Legend:

- 1 LI
- 2 LSG
- 3 LRYGB
- 4 BPD-DS.

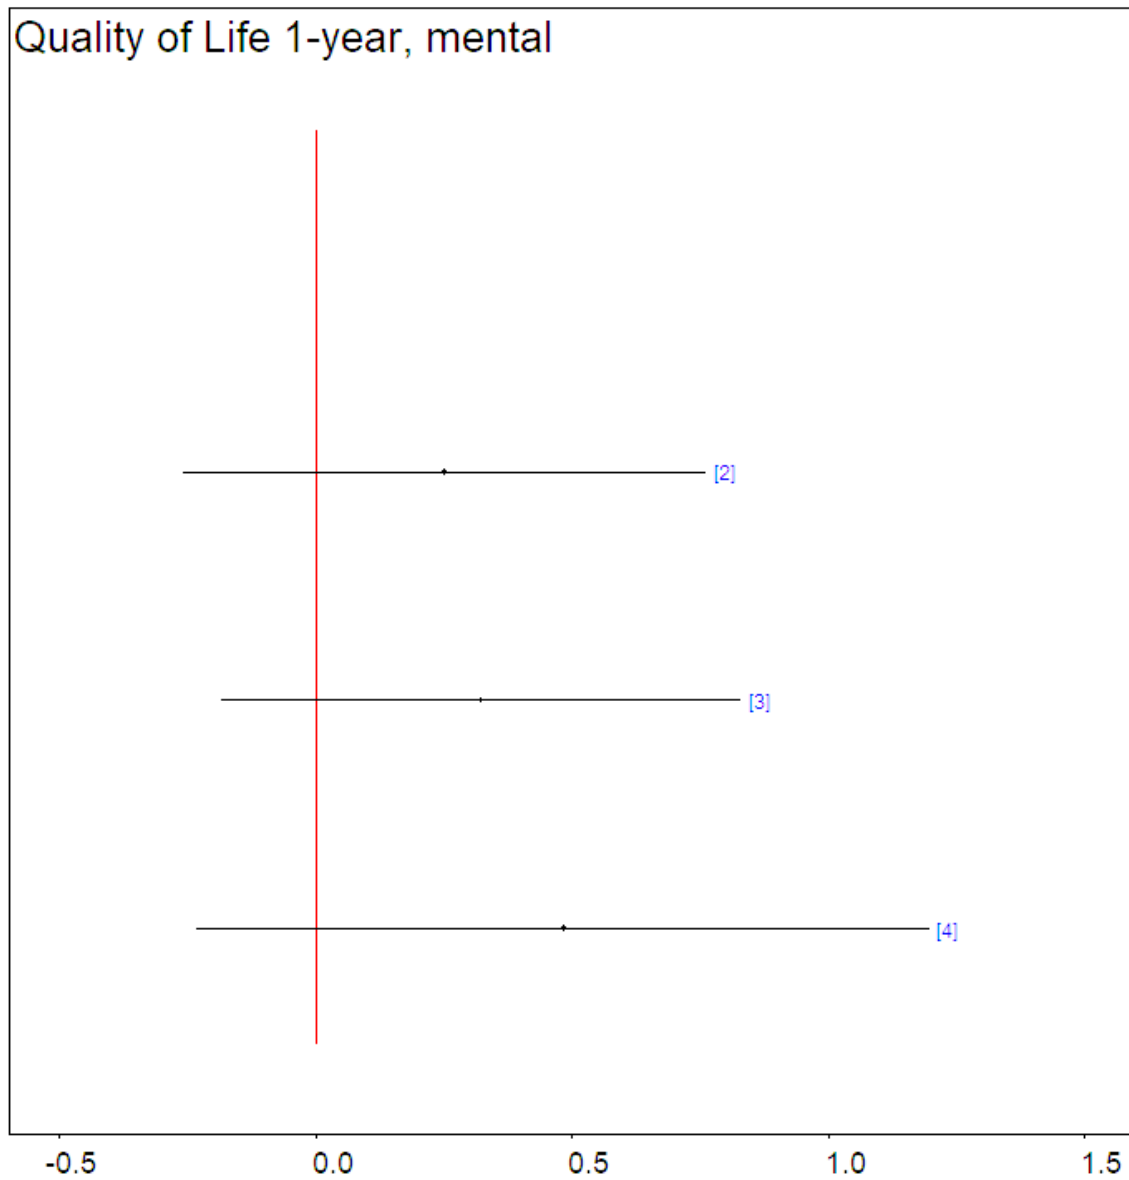

| node | mean   | sd     | MC error | 2.5%    | median | 97.5%  |
|------|--------|--------|----------|---------|--------|--------|
| d[2] | 0.2512 | 0.2597 | 7.392E-4 | -0.2583 | 0.251  | 0.7603 |
| d[3] | 0.3224 | 0.258  | 7.369E-4 | -0.1834 | 0.3223 | 0.8285 |
| d[4] | 0.4825 | 0.3649 | 0.001039 | -0.2356 | 0.4825 | 1.197  |

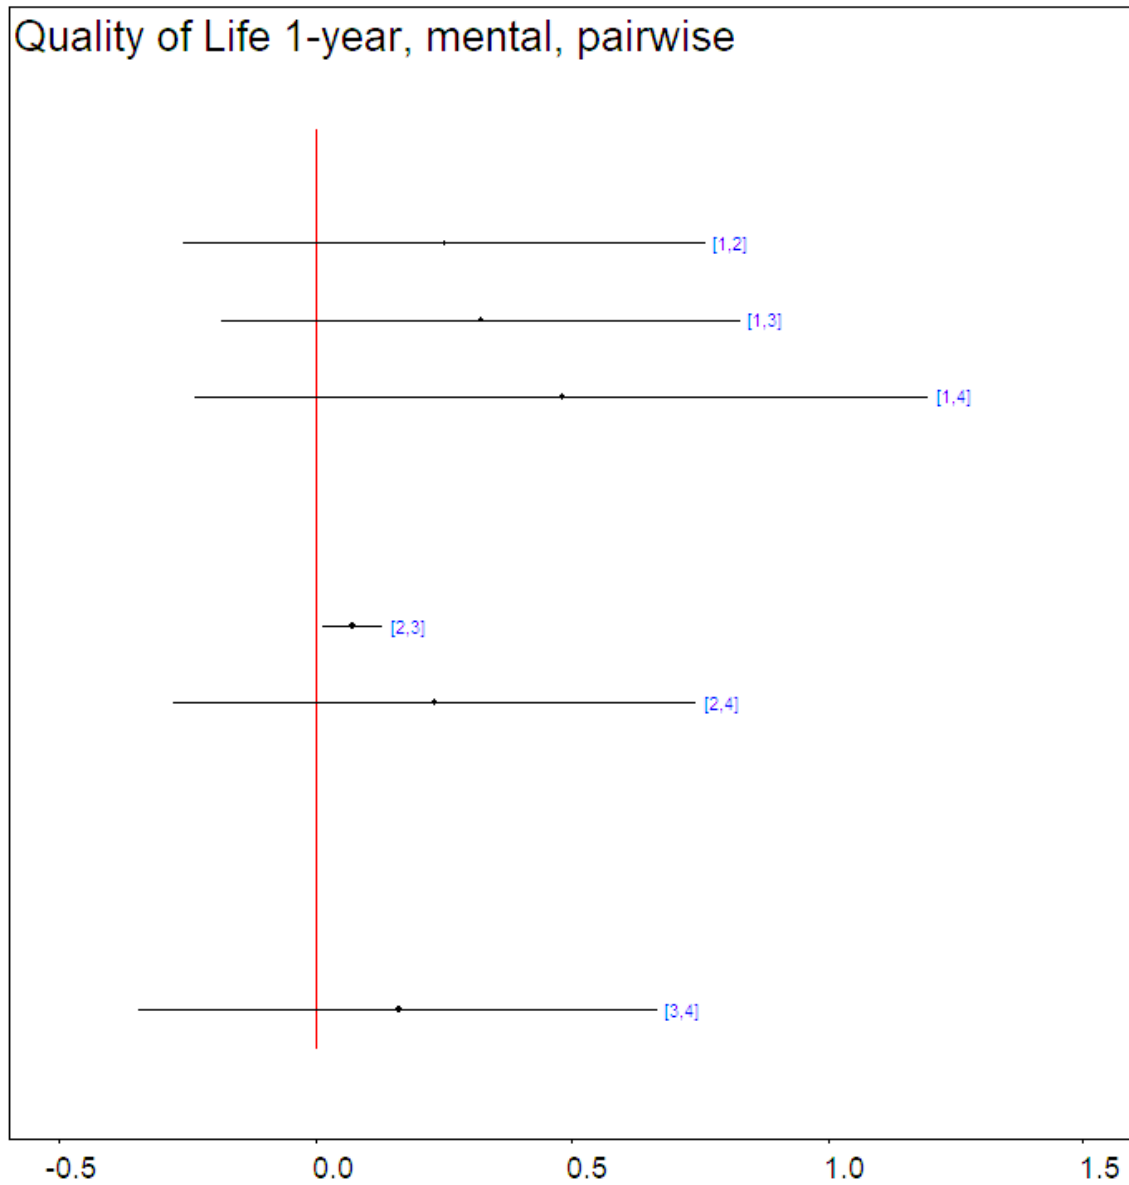

| node      | mean    | sd      | MC error | 2.5%    | median | 97.5%  |
|-----------|---------|---------|----------|---------|--------|--------|
| diff[1,2] | 0.2512  | 0.2597  | 7.392E-4 | -0.2583 | 0.251  | 0.7603 |
| diff[1,3] | 0.3224  | 0.258   | 7.369E-4 | -0.1834 | 0.3223 | 0.8285 |
| diff[1,4] | 0.4825  | 0.3649  | 0.001039 | -0.2356 | 0.4825 | 1.197  |
| diff[2,3] | 0.07117 | 0.03008 | 5.075E-5 | 0.01229 | 0.0711 | 0.1301 |
| diff[2,4] | 0.2313  | 0.2605  | 4.349E-4 | -0.2789 | 0.2316 | 0.7422 |
| diff[3,4] | 0.1601  | 0.2587  | 4.327E-4 | -0.3469 | 0.1602 | 0.6673 |

## QoL 1-year bodily pain

6 studies

Legend:

- 1 LI
- 2 LSG
- 3 LRYGB
- 4 BPD-DS

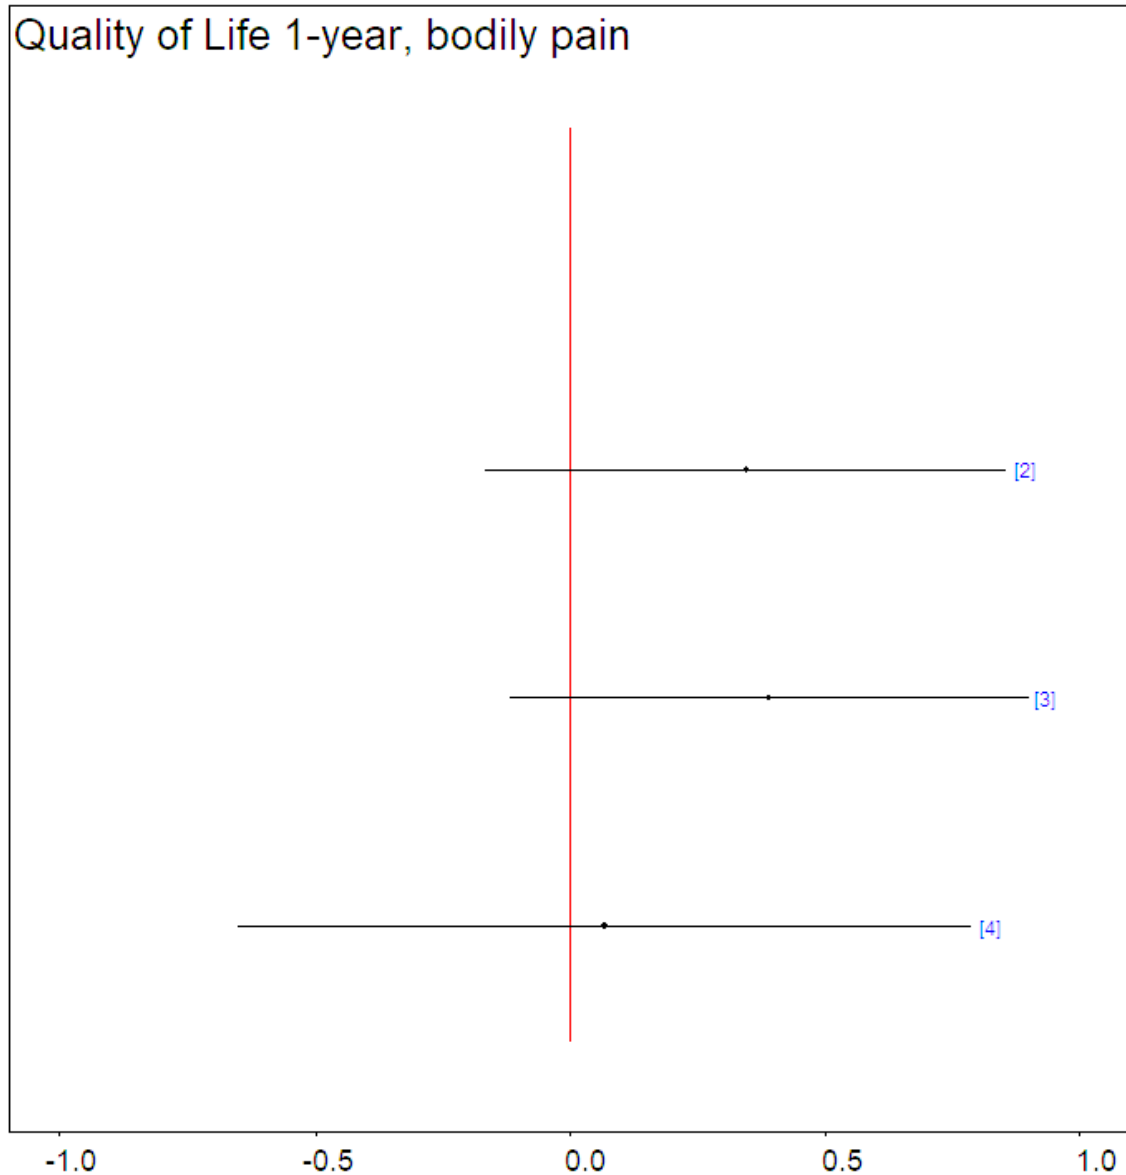

| node | mean    | sd     | MC error | 2.5%    | median  | 97.5%  |
|------|---------|--------|----------|---------|---------|--------|
| d[2] | 0.3451  | 0.2606 | 7.406E-4 | -0.166  | 0.3449  | 0.8558 |
| d[3] | 0.3899  | 0.2589 | 7.383E-4 | -0.1174 | 0.3898  | 0.8977 |
| d[4] | 0.06905 | 0.3664 | 0.001042 | -0.652  | 0.06909 | 0.786  |

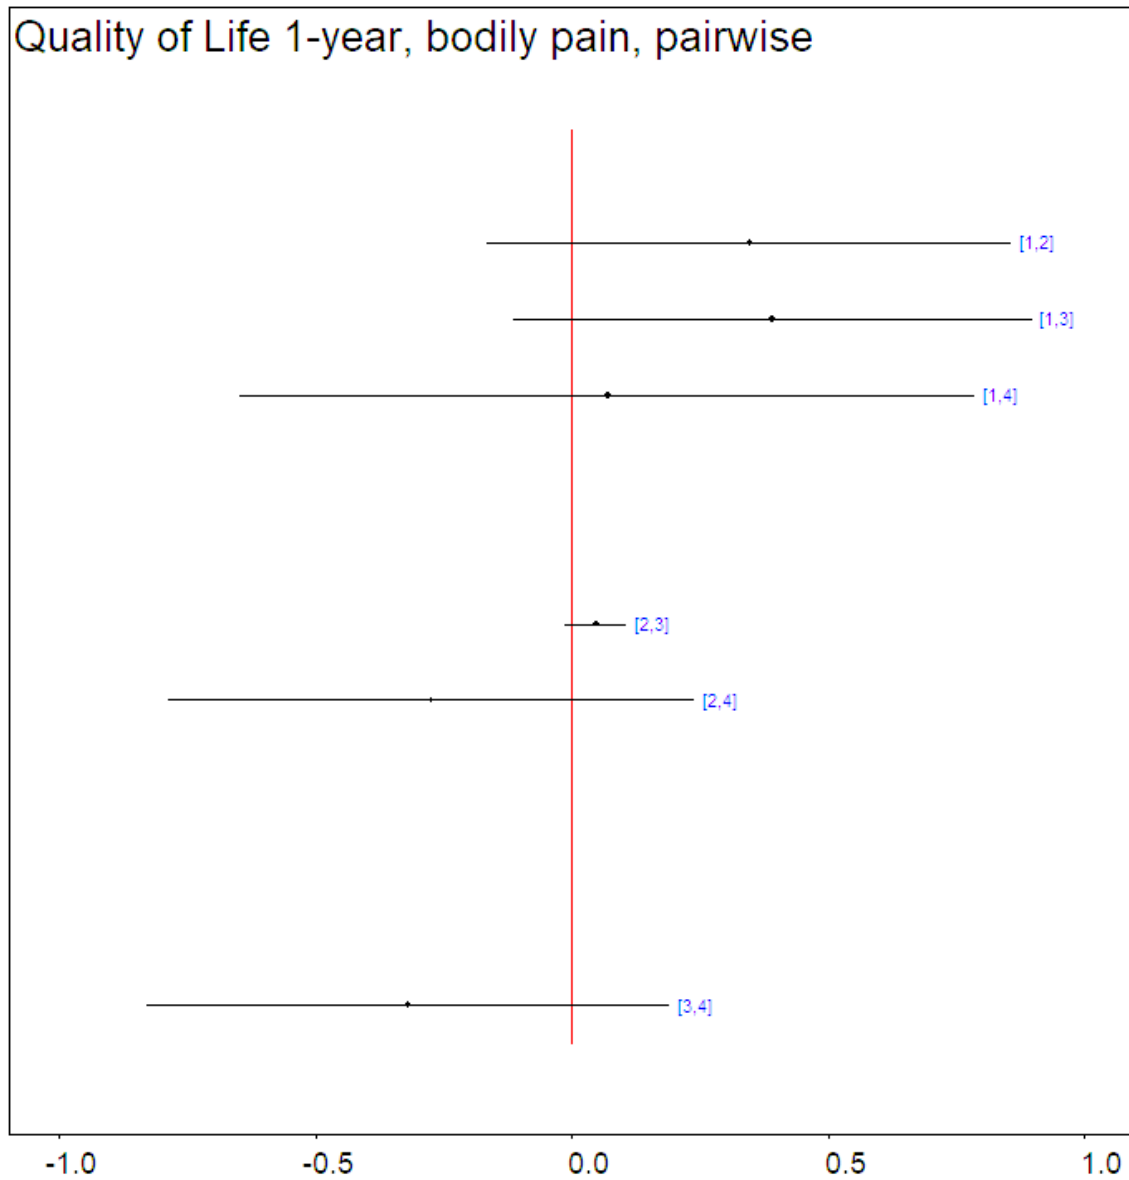

| node      | mean    | sd      | MC error | 2.5%     | median  | 97.5%  |
|-----------|---------|---------|----------|----------|---------|--------|
| diff[1,2] | 0.3451  | 0.2606  | 7.406E-4 | -0.166   | 0.3449  | 0.8558 |
| diff[1,3] | 0.3899  | 0.2589  | 7.383E-4 | -0.1174  | 0.3898  | 0.8977 |
| diff[1,4] | 0.06905 | 0.3664  | 0.001042 | -0.652   | 0.06909 | 0.786  |
| diff[2,3] | 0.04483 | 0.03029 | 5.111E-5 | -0.01446 | 0.04477 | 0.1042 |
| diff[2,4] | -0.2761 | 0.2618  | 4.371E-4 | -0.7889  | -0.2757 | 0.2375 |
| diff[3,4] | -0.3209 | 0.2601  | 4.349E-4 | -0.8305  | -0.3208 | 0.1889 |

### Total QoL 2-years

15 studies

**Legend:**

- 1 LI
- 2 LSG
- 3 LRYGB
- 4 BPD-DS
- 5 LAGB
- 6 Banded-GB
- 7 Distal-GB
- 8 OAGB
- 9 LB-GB

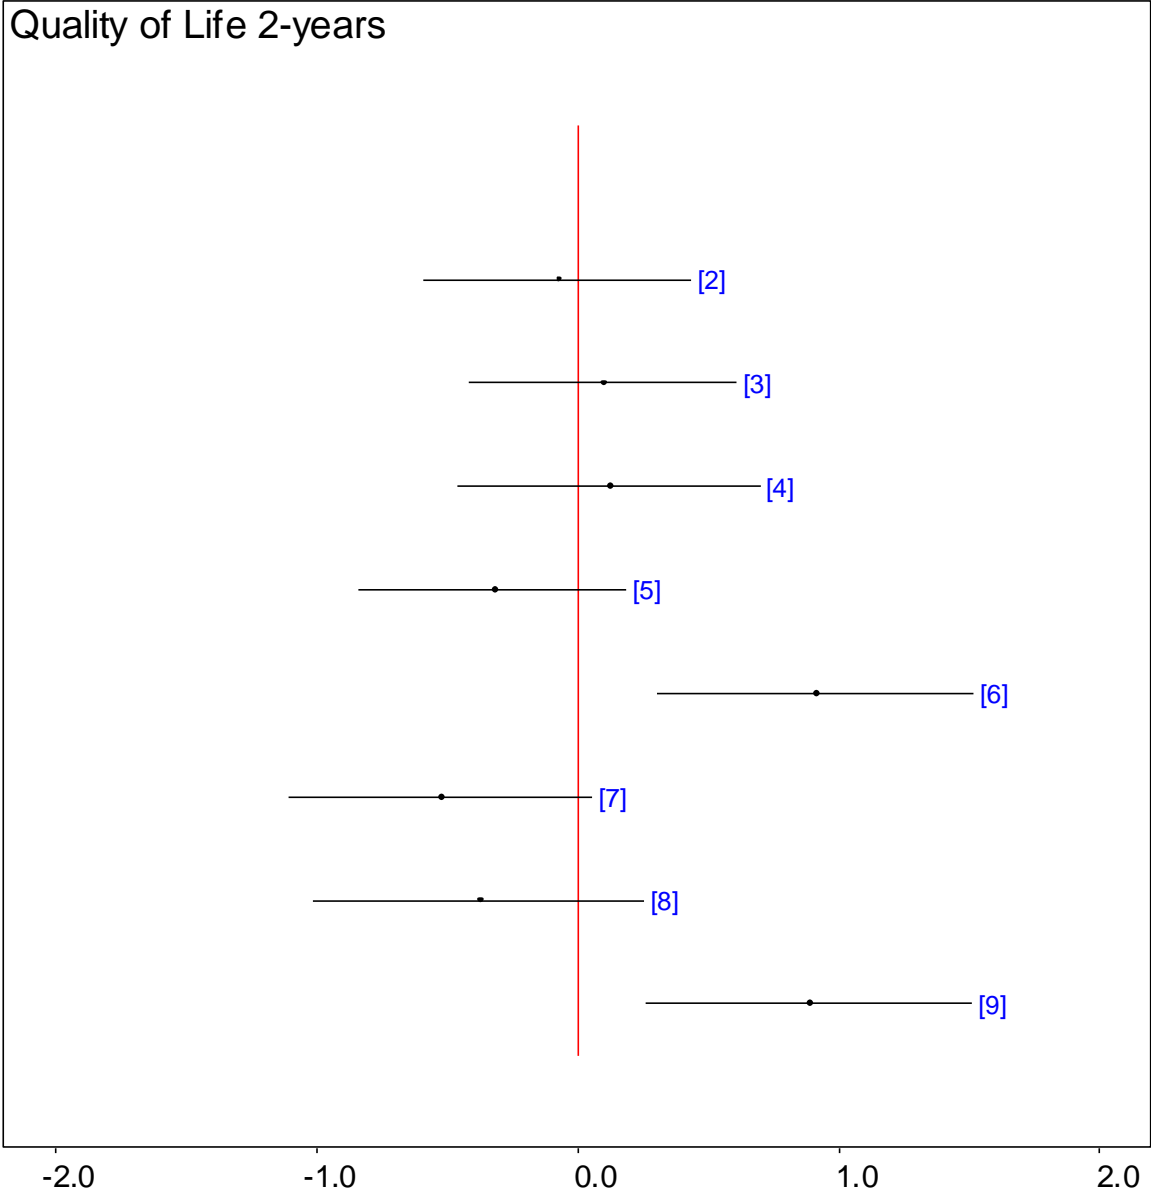



| node      | mean     | sd     | MC error | 2.5%    | median   | 97.5%   |
|-----------|----------|--------|----------|---------|----------|---------|
| d[2]      | -0.07122 | 0.2635 | 0.004246 | -0.588  | -0.06716 | 0.4361  |
| d[3]      | 0.1026   | 0.2632 | 0.004239 | -0.415  | 0.1065   | 0.6091  |
| d[4]      | 0.1241   | 0.297  | 0.004279 | -0.4596 | 0.1268   | 0.7007  |
| d[5]      | -0.3188  | 0.2636 | 0.004117 | -0.8368 | -0.3157  | 0.1897  |
| d[6]      | 0.9172   | 0.3111 | 0.004283 | 0.3036  | 0.9192   | 1.52    |
| d[7]      | -0.523   | 0.2981 | 0.004289 | -1.11   | -0.521   | 0.05559 |
| d[8]      | -0.3739  | 0.3235 | 0.004287 | -1.011  | -0.372   | 0.2554  |
| d[9]      | 0.8906   | 0.319  | 0.004292 | 0.2647  | 0.8932   | 1.512   |
| Totresdev | 19.14    | 6.431  | 0.01563  | 8.744   | 18.43    | 33.72   |

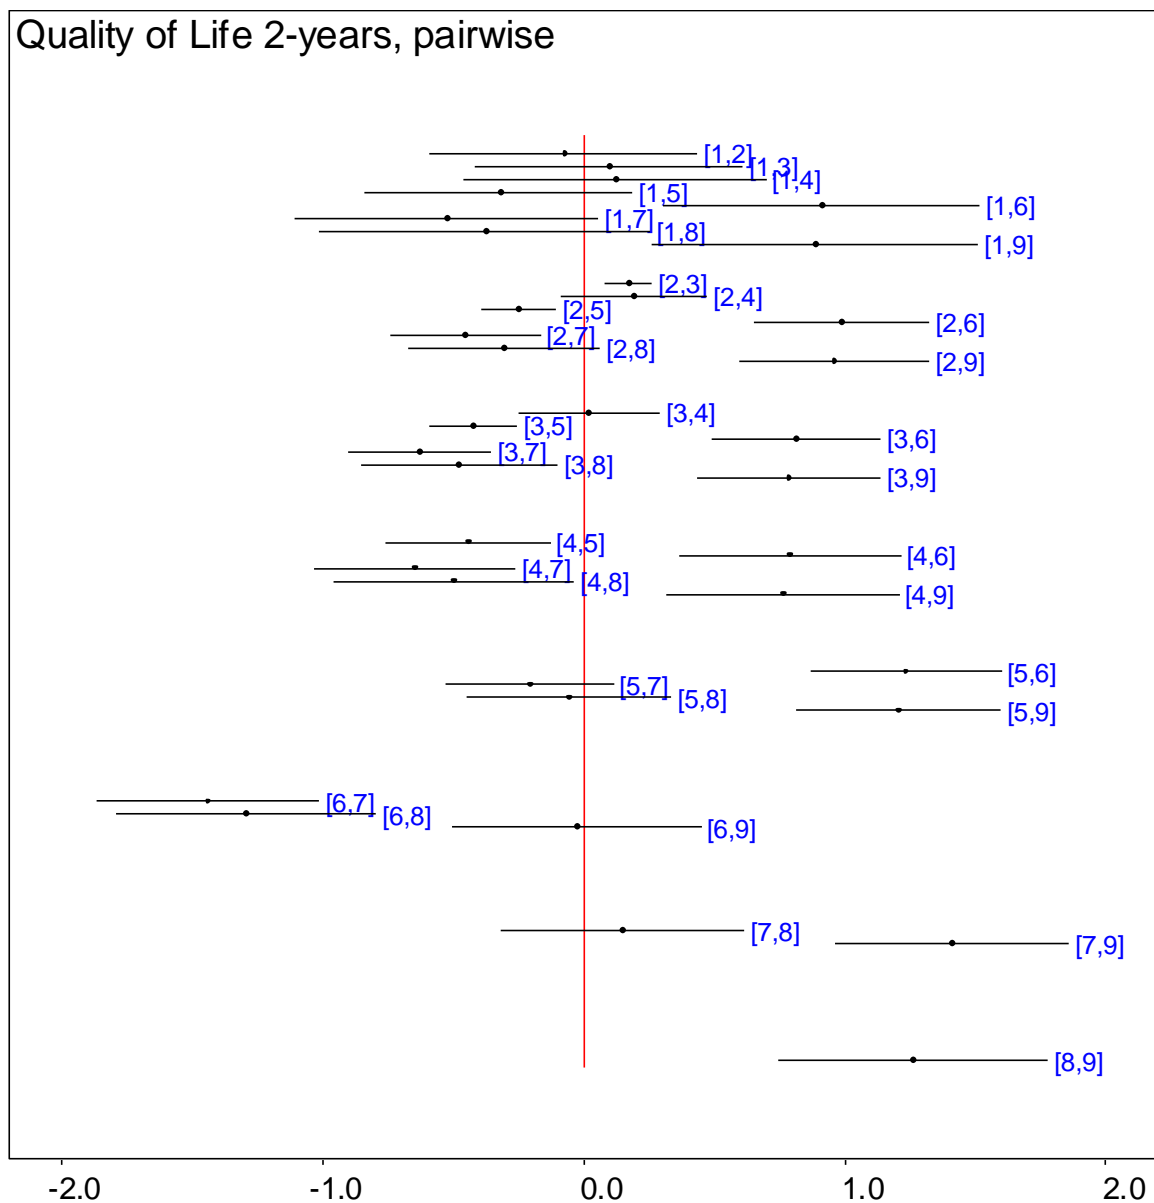

| <b>node</b> | <b>mean</b> | <b>sd</b> | <b>MC error</b> | <b>2.5%</b> | <b>median</b> | <b>97.5%</b> |
|-------------|-------------|-----------|-----------------|-------------|---------------|--------------|
| diff[1,2]   | -0.07122    | 0.2635    | 0.004246        | -0.588      | -0.06716      | 0.4361       |
| diff[1,3]   | 0.1026      | 0.2632    | 0.004239        | -0.415      | 0.1065        | 0.6091       |
| diff[1,4]   | 0.1241      | 0.297     | 0.004279        | -0.4596     | 0.1268        | 0.7007       |
| diff[1,5]   | -0.3188     | 0.2636    | 0.004117        | -0.8368     | -0.3157       | 0.1897       |
| diff[1,6]   | 0.9172      | 0.3111    | 0.004283        | 0.3036      | 0.9192        | 1.52         |
| diff[1,7]   | -0.523      | 0.2981    | 0.004289        | -1.11       | -0.521        | 0.05559      |
| diff[1,8]   | -0.3739     | 0.3235    | 0.004287        | -1.011      | -0.372        | 0.2554       |
| diff[1,9]   | 0.8906      | 0.319     | 0.004292        | 0.2647      | 0.8932        | 1.512        |
| diff[2,3]   | 0.1738      | 0.0459    | 7.244E-5        | 0.08395     | 0.1738        | 0.2639       |
| diff[2,4]   | 0.1953      | 0.1437    | 2.442E-4        | -0.0864     | 0.1955        | 0.4763       |
| diff[2,5]   | -0.2476     | 0.07381   | 1.755E-4        | -0.3926     | -0.2476       | -0.1034      |
| diff[2,6]   | 0.9884      | 0.1723    | 3.054E-4        | 0.6509      | 0.9881        | 1.326        |
| diff[2,7]   | -0.4517     | 0.1467    | 2.633E-4        | -0.7393     | -0.4519       | -0.1633      |
| diff[2,8]   | -0.3027     | 0.1868    | 3.119E-4        | -0.6695     | -0.3024       | 0.06321      |
| diff[2,9]   | 0.9619      | 0.1855    | 3.059E-4        | 0.5971      | 0.9622        | 1.326        |
| diff[3,4]   | 0.02151     | 0.1386    | 2.298E-4        | -0.2506     | 0.02183       | 0.2922       |
| diff[3,5]   | -0.4214     | 0.08635   | 1.969E-4        | -0.5909     | -0.4214       | -0.2521      |
| diff[3,6]   | 0.8146      | 0.166     | 2.868E-4        | 0.4901      | 0.8147        | 1.14         |
| diff[3,7]   | -0.6255     | 0.1392    | 2.386E-4        | -0.8985     | -0.6256       | -0.3516      |
| diff[3,8]   | -0.4765     | 0.1925    | 3.292E-4        | -0.8545     | -0.4763       | -0.09883     |
| diff[3,9]   | 0.7881      | 0.1797    | 2.936E-4        | 0.434       | 0.7884        | 1.141        |
| diff[4,5]   | -0.4429     | 0.1615    | 3.244E-4        | -0.7589     | -0.443        | -0.1265      |
| diff[4,6]   | 0.7931      | 0.2162    | 3.769E-4        | 0.3705      | 0.7926        | 1.217        |
| diff[4,7]   | -0.647      | 0.1963    | 3.258E-4        | -1.031      | -0.647        | -0.2616      |
| diff[4,8]   | -0.498      | 0.2358    | 3.971E-4        | -0.9594     | -0.4977       | -0.03558     |
| diff[4,9]   | 0.7665      | 0.2269    | 3.853E-4        | 0.3208      | 0.7666        | 1.212        |
| diff[5,6]   | 1.236       | 0.1872    | 3.69E-4         | 0.8698      | 1.236         | 1.603        |
| diff[5,7]   | -0.2041     | 0.1639    | 3.435E-4        | -0.5254     | -0.2041       | 0.1171       |
| diff[5,8]   | -0.05506    | 0.2009    | 3.675E-4        | -0.4503     | -0.05507      | 0.3394       |
| diff[5,9]   | 1.209       | 0.1996    | 3.746E-4        | 0.8175      | 1.21          | 1.6          |
| diff[6,7]   | -1.44       | 0.2167    | 3.847E-4        | -1.865      | -1.44         | -1.014       |
| diff[6,8]   | -1.291      | 0.254     | 4.41E-4         | -1.79       | -1.291        | -0.7932      |
| diff[6,9]   | -0.02654    | 0.2444    | 4.137E-4        | -0.5061     | -0.02621      | 0.4528       |
| diff[7,8]   | 0.1491      | 0.2373    | 4.155E-4        | -0.3164     | 0.1484        | 0.6156       |
| diff[7,9]   | 1.414       | 0.2275    | 3.764E-4        | 0.9672      | 1.414         | 1.861        |
| diff[8,9]   | 1.265       | 0.2633    | 4.406E-4        | 0.7486      | 1.264         | 1.779        |

## QoL 2-years physical

6 studies

**Legend:**

- 1 LI
- 2 LSG
- 3 LRYGB
- 4 BPD-DS
- 5 LAGB
- 6 Distal-GB

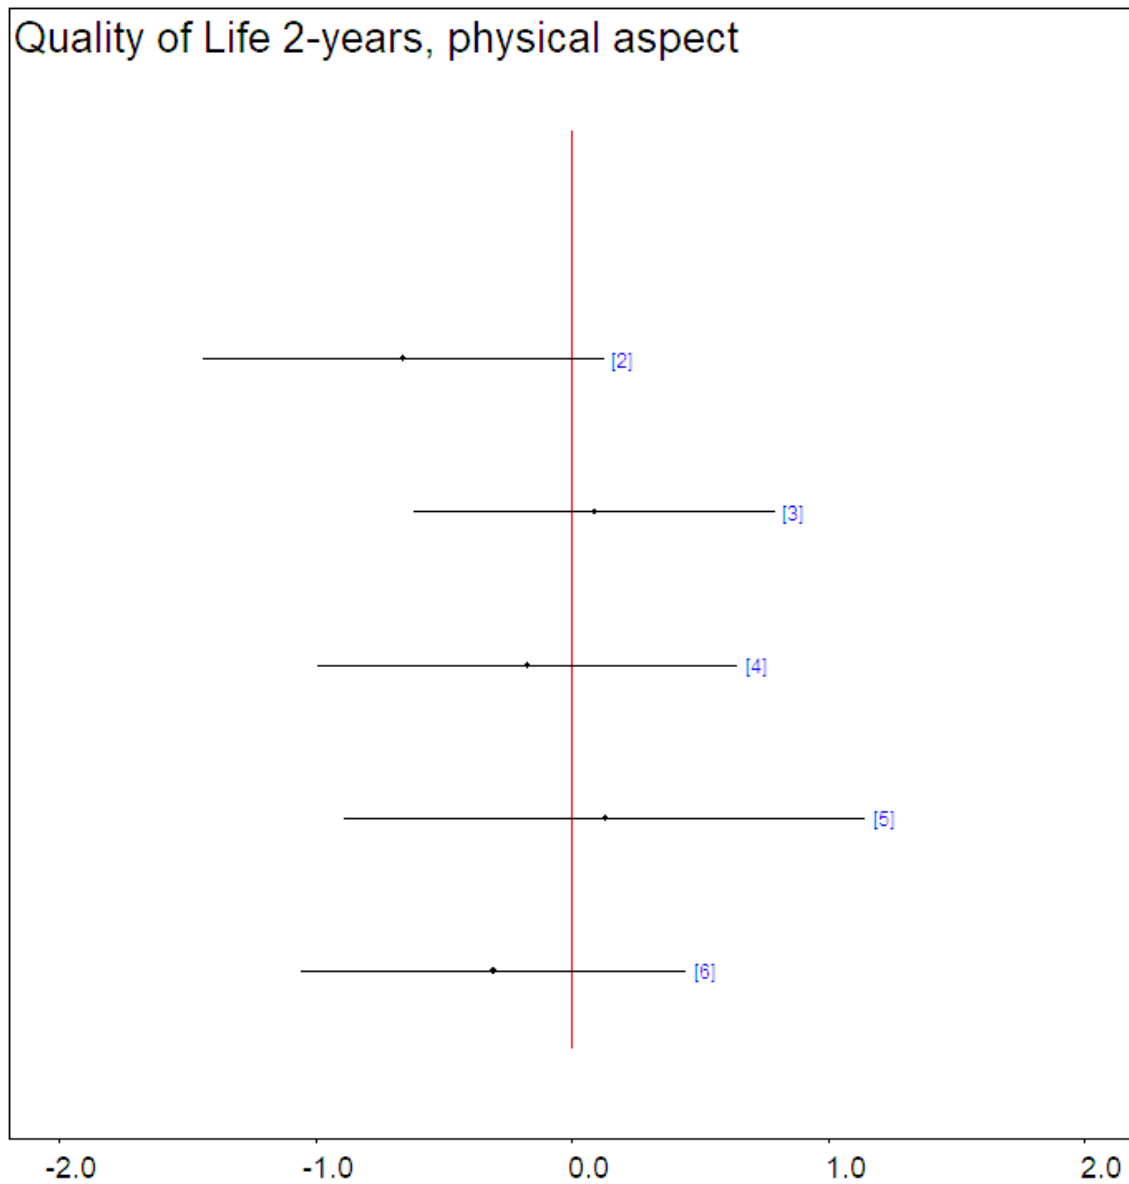

| node | mean    | sd     | MC error | 2.5%    | median  | 97.5%  |
|------|---------|--------|----------|---------|---------|--------|
| d[2] | -0.6613 | 0.4008 | 0.003394 | -1.446  | -0.6614 | 0.1234 |
| d[3] | 0.08599 | 0.3584 | 0.00316  | -0.6157 | 0.08609 | 0.7897 |
| d[4] | -0.1762 | 0.4178 | 0.003379 | -0.9956 | -0.1761 | 0.6436 |
| d[5] | 0.1266  | 0.518  | 0.003542 | -0.8901 | 0.1265  | 1.143  |

|      |         |        |          |        |         |        |
|------|---------|--------|----------|--------|---------|--------|
| d[6] | -0.3069 | 0.3833 | 0.003267 | -1.057 | -0.3071 | 0.4458 |
|------|---------|--------|----------|--------|---------|--------|

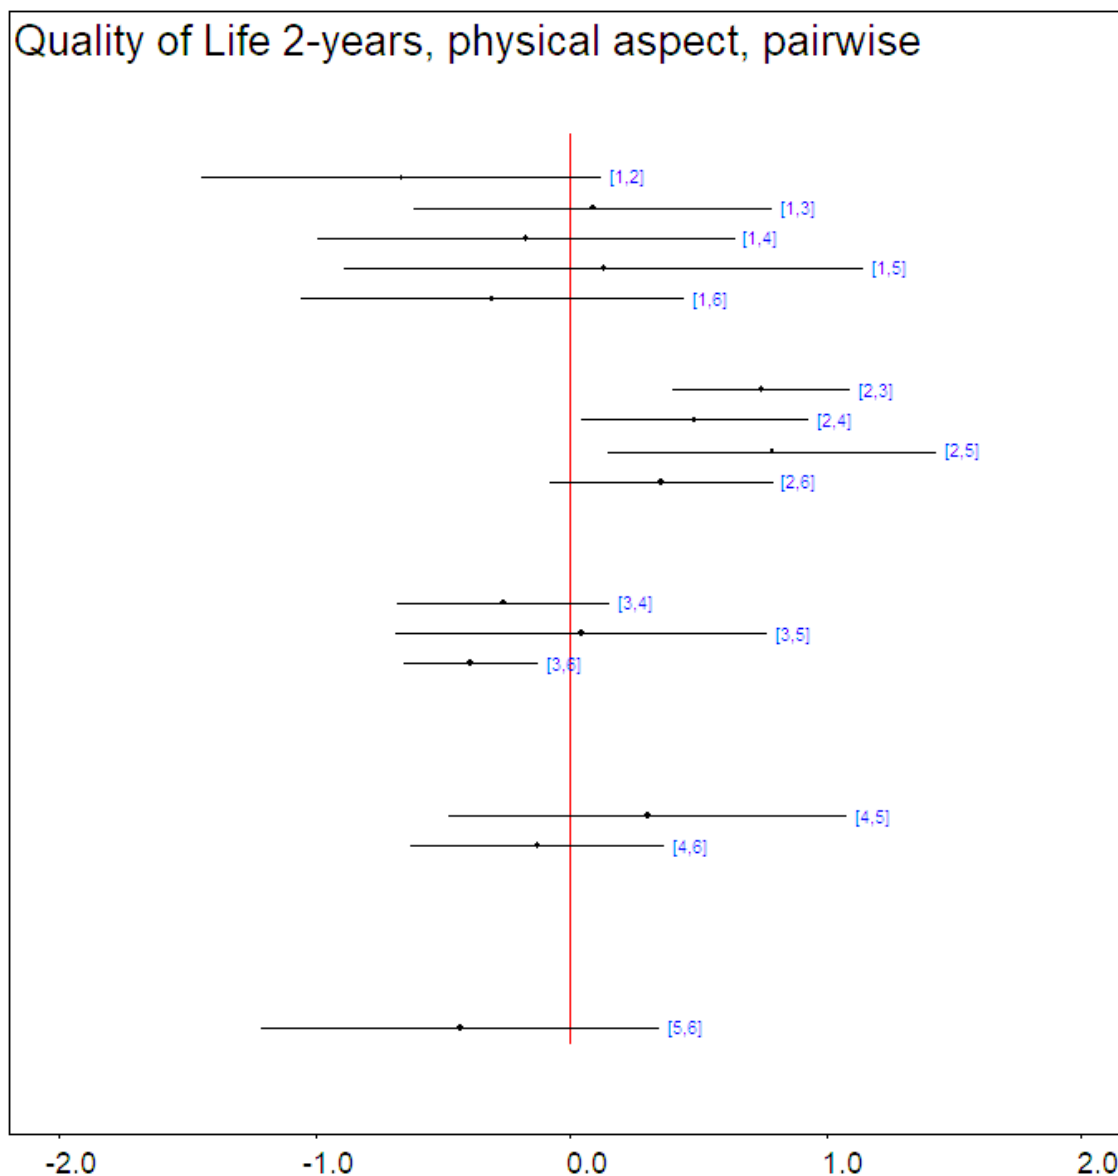

| node      | mean    | sd     | MC error | 2.5%     | median  | 97.5%  |
|-----------|---------|--------|----------|----------|---------|--------|
| diff[1,2] | -0.6613 | 0.4008 | 0.003394 | -1.446   | -0.6614 | 0.1234 |
| diff[1,3] | 0.08599 | 0.3584 | 0.00316  | -0.6157  | 0.08609 | 0.7897 |
| diff[1,4] | -0.1762 | 0.4178 | 0.003379 | -0.9956  | -0.1761 | 0.6436 |
| diff[1,5] | 0.1266  | 0.518  | 0.003542 | -0.8901  | 0.1265  | 1.143  |
| diff[1,6] | -0.3069 | 0.3833 | 0.003267 | -1.057   | -0.3071 | 0.4458 |
| diff[2,3] | 0.7473  | 0.1782 | 4.022E-4 | 0.398    | 0.7471  | 1.097  |
| diff[2,4] | 0.4852  | 0.2273 | 3.558E-4 | 0.03917  | 0.4856  | 0.9313 |
| diff[2,5] | 0.7879  | 0.3281 | 5.542E-4 | 0.1455   | 0.7879  | 1.432  |
| diff[2,6] | 0.3544  | 0.2238 | 4.629E-4 | -0.08501 | 0.3545  | 0.7929 |

|           |         |        |          |         |         |         |
|-----------|---------|--------|----------|---------|---------|---------|
| diff[3,4] | -0.2621 | 0.2134 | 4.088E-4 | -0.6814 | -0.2616 | 0.1552  |
| diff[3,5] | 0.04057 | 0.3734 | 7.996E-4 | -0.69   | 0.04072 | 0.7723  |
| diff[3,6] | -0.3929 | 0.135  | 2.242E-4 | -0.6582 | -0.3927 | -0.1286 |
| diff[4,5] | 0.3027  | 0.3987 | 7.441E-4 | -0.4769 | 0.3027  | 1.084   |
| diff[4,6] | -0.1308 | 0.2527 | 4.729E-4 | -0.6254 | -0.1302 | 0.3655  |
| diff[5,6] | -0.4335 | 0.3972 | 8.267E-4 | -1.212  | -0.4338 | 0.3453  |

## Qol 2-years emotional

4 studies

Legend:

- 1 LSG
- 2 LRYGB
- 3 BPD-DS
- 4 LAGB
- 5 Distal-GB

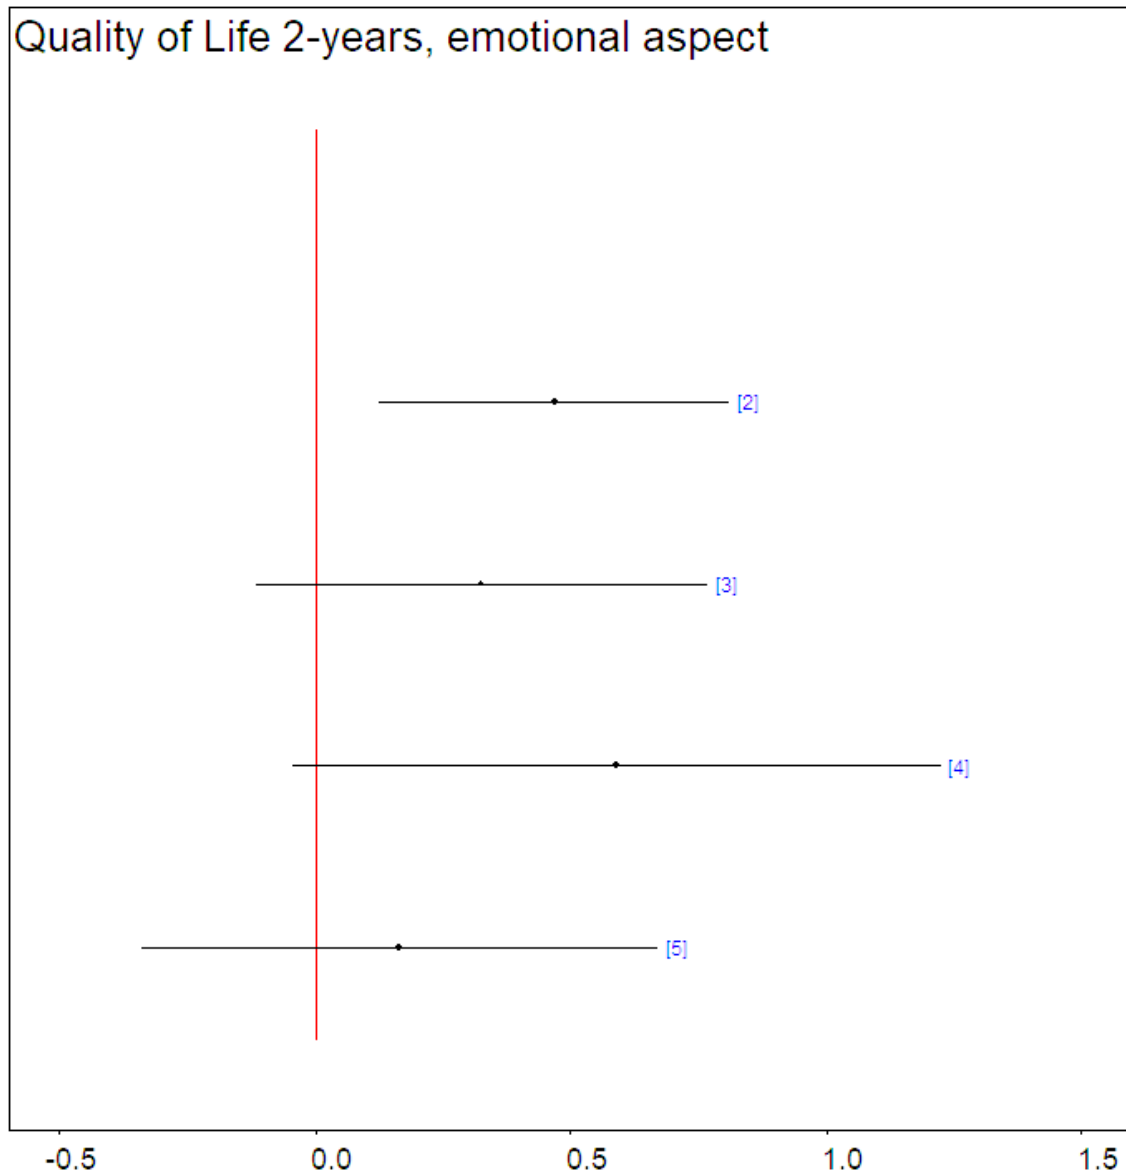

| node | mean   | sd     | MC error | 2.5%     | median | 97.5%  |
|------|--------|--------|----------|----------|--------|--------|
| d[2] | 0.4681 | 0.1751 | 5.344E-4 | 0.1253   | 0.4681 | 0.8109 |
| d[3] | 0.3252 | 0.2256 | 5.337E-4 | -0.116   | 0.3251 | 0.7681 |
| d[4] | 0.5897 | 0.3231 | 5.287E-4 | -0.04418 | 0.5897 | 1.223  |

|      |        |        |          |         |        |        |
|------|--------|--------|----------|---------|--------|--------|
| d[5] | 0.1633 | 0.2574 | 7.573E-4 | -0.3398 | 0.1631 | 0.6696 |
|------|--------|--------|----------|---------|--------|--------|

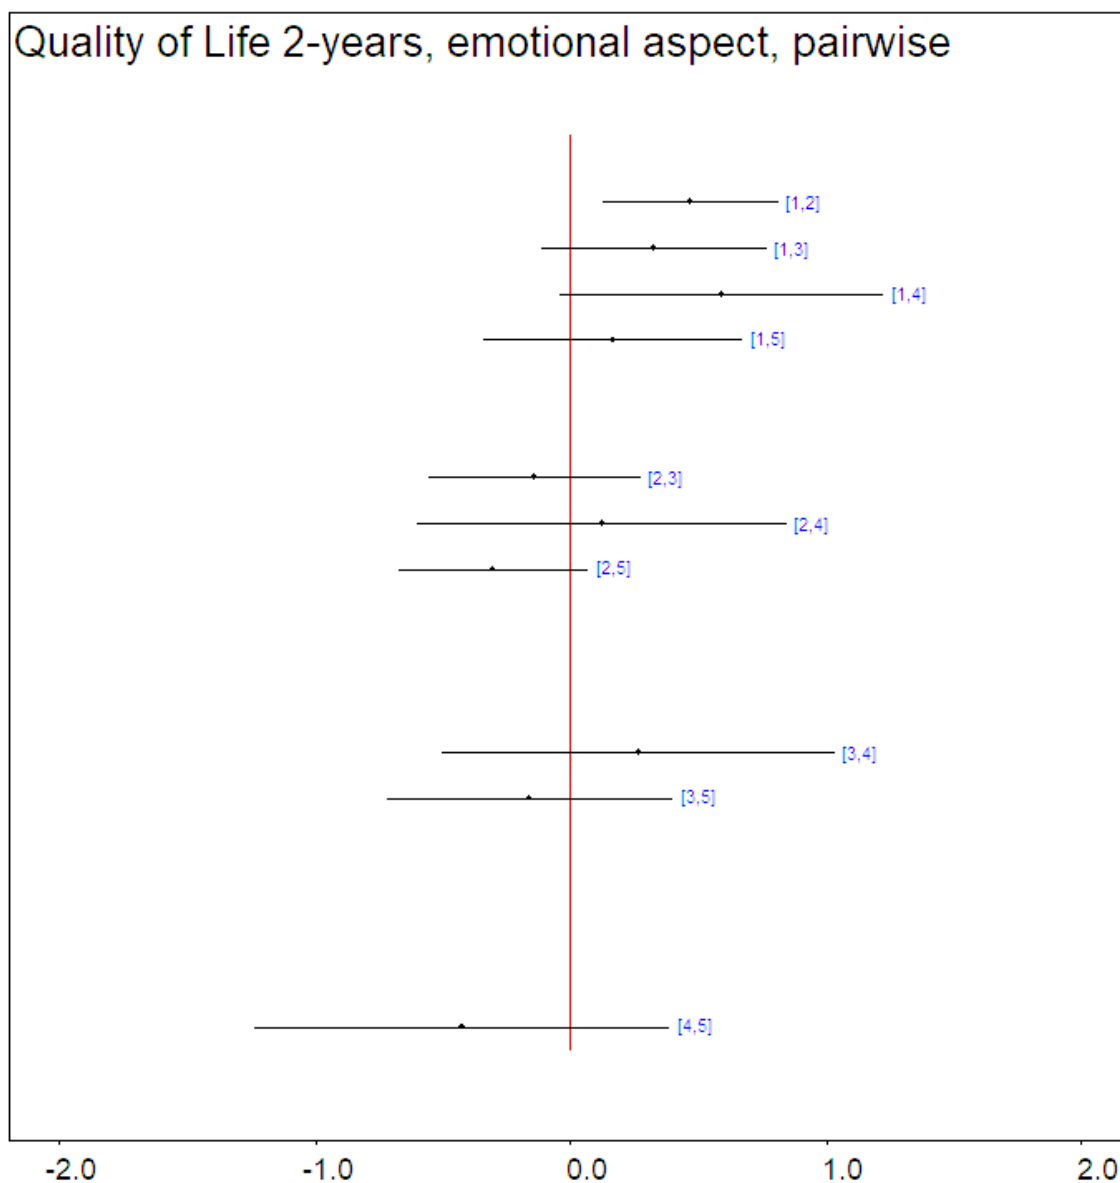

| node      | mean    | sd     | MC error | 2.5%     | median  | 97.5%   |
|-----------|---------|--------|----------|----------|---------|---------|
| diff[1,2] | 0.4681  | 0.1751 | 5.344E-4 | 0.1253   | 0.4681  | 0.8109  |
| diff[1,3] | 0.3252  | 0.2256 | 5.337E-4 | -0.116   | 0.3251  | 0.7681  |
| diff[1,4] | 0.5897  | 0.3231 | 5.287E-4 | -0.04418 | 0.5897  | 1.223   |
| diff[1,5] | 0.1633  | 0.2574 | 7.573E-4 | -0.3398  | 0.1631  | 0.6696  |
| diff[2,3] | -0.1429 | 0.2122 | 3.315E-4 | -0.5595  | -0.1429 | 0.273   |
| diff[2,4] | 0.1216  | 0.3673 | 7.459E-4 | -0.5979  | 0.1217  | 0.8425  |
| diff[2,5] | -0.3047 | 0.1891 | 3.226E-4 | -0.6758  | -0.3045 | 0.06634 |
| diff[3,4] | 0.2645  | 0.3939 | 7.479E-4 | -0.5085  | 0.2642  | 1.034   |
| diff[3,5] | -0.1619 | 0.2838 | 5.236E-4 | -0.7189  | -0.1619 | 0.3957  |
| diff[4,5] | -0.4264 | 0.4134 | 9.218E-4 | -1.235   | -0.427  | 0.3841  |

## QoL 2-years general health

4 studies

**Legend:**

- 1 LSG
- 2 LRYGB
- 3 BPD-DS
- 4 LAGB
- 5 Distal-GB

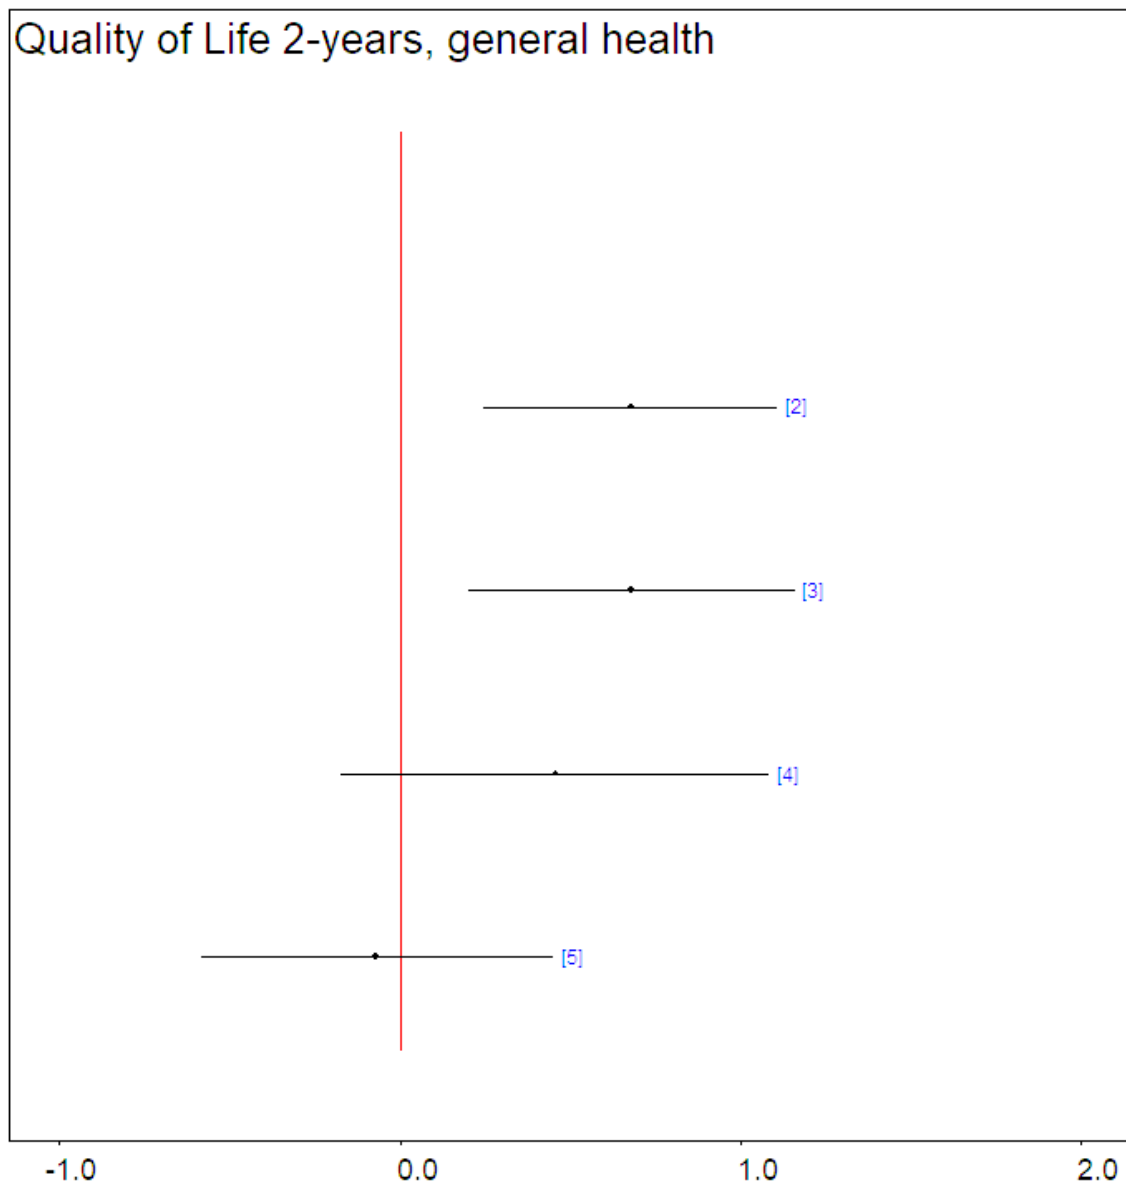

| node | mean   | sd     | MC error | 2.5%    | median | 97.5% |
|------|--------|--------|----------|---------|--------|-------|
| d[2] | 0.6739 | 0.2206 | 9.61E-4  | 0.2431  | 0.6738 | 1.106 |
| d[3] | 0.6771 | 0.2451 | 7.711E-4 | 0.1983  | 0.6769 | 1.159 |
| d[4] | 0.4536 | 0.3201 | 5.238E-4 | -0.1744 | 0.4536 | 1.081 |



|      |          |        |          |         |          |        |
|------|----------|--------|----------|---------|----------|--------|
| d[5] | -0.07028 | 0.2628 | 0.001128 | -0.5839 | -0.07059 | 0.4467 |
|------|----------|--------|----------|---------|----------|--------|

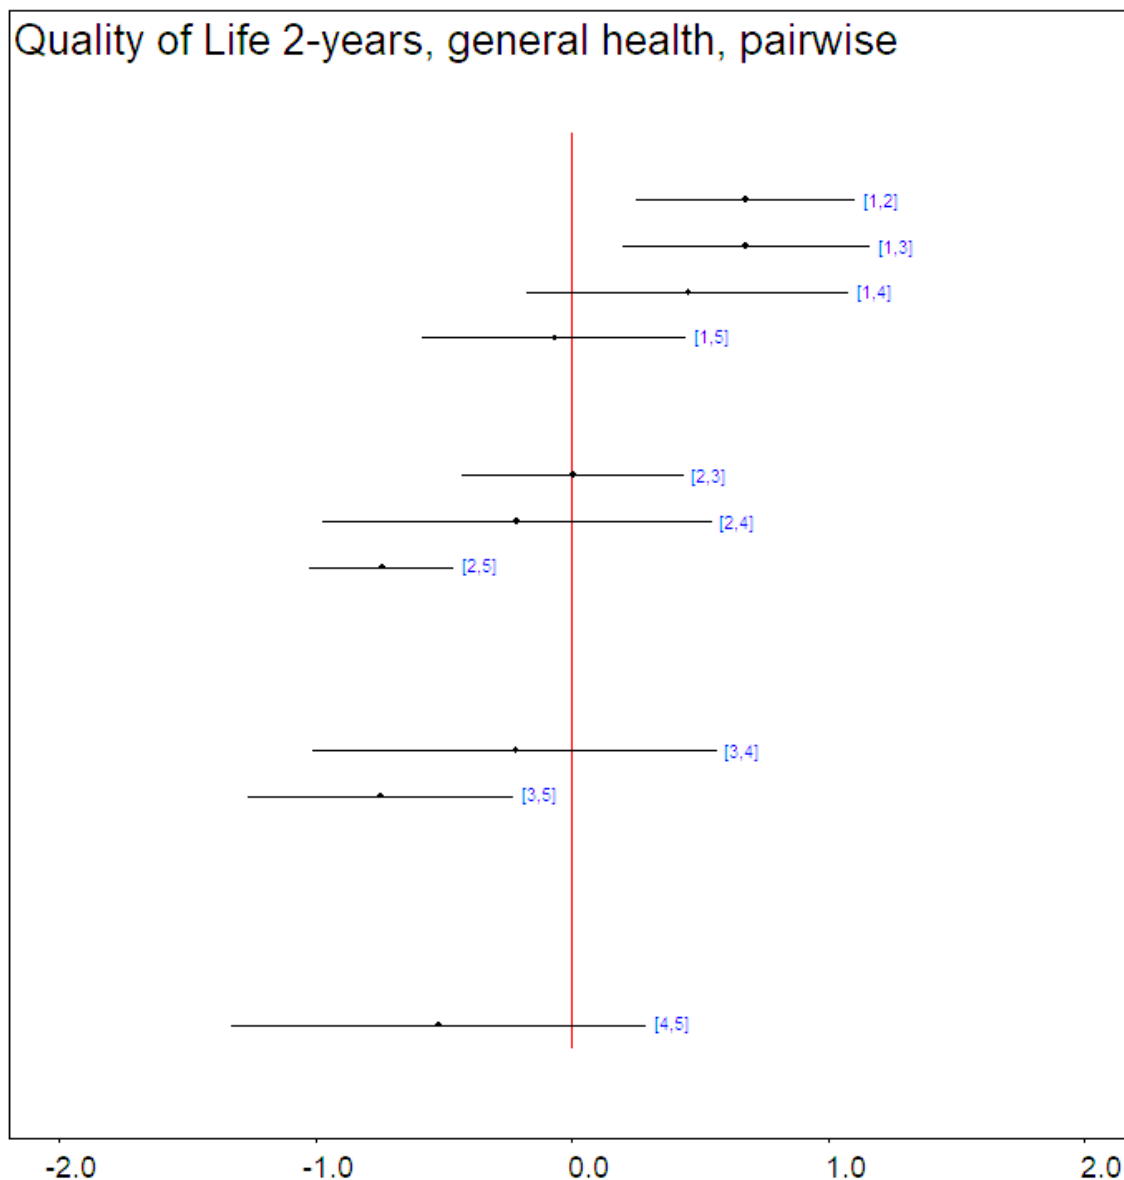

| node      | mean     | sd     | MC error | 2.5%    | median   | 97.5%   |
|-----------|----------|--------|----------|---------|----------|---------|
| diff[1,2] | 0.6739   | 0.2206 | 9.61E-4  | 0.2431  | 0.6738   | 1.106   |
| diff[1,3] | 0.6771   | 0.2451 | 7.711E-4 | 0.1983  | 0.6769   | 1.159   |
| diff[1,4] | 0.4536   | 0.3201 | 5.238E-4 | -0.1744 | 0.4536   | 1.081   |
| diff[1,5] | -0.07028 | 0.2628 | 0.001128 | -0.5839 | -0.07059 | 0.4467  |
| diff[2,3] | 0.003115 | 0.2204 | 4.158E-4 | -0.4293 | 0.003302 | 0.4356  |
| diff[2,4] | -0.2203  | 0.3884 | 0.001089 | -0.9798 | -0.2203  | 0.5412  |
| diff[2,5] | -0.7442  | 0.1433 | 2.446E-4 | -1.026  | -0.744   | -0.4629 |
| diff[3,4] | -0.2234  | 0.4029 | 9.279E-4 | -1.014  | -0.224   | 0.5642  |
| diff[3,5] | -0.7473  | 0.2625 | 5.761E-4 | -1.263  | -0.7472  | -0.2321 |
| diff[4,5] | -0.5239  | 0.4142 | 0.00124  | -1.335  | -0.5245  | 0.2883  |

## QoL 2-years vitality

3 studies

Legend:

- 1 LSG
- 2 LRYGB
- 3 BPD-DS
- 4 LAGB
- 5 Distal-GB

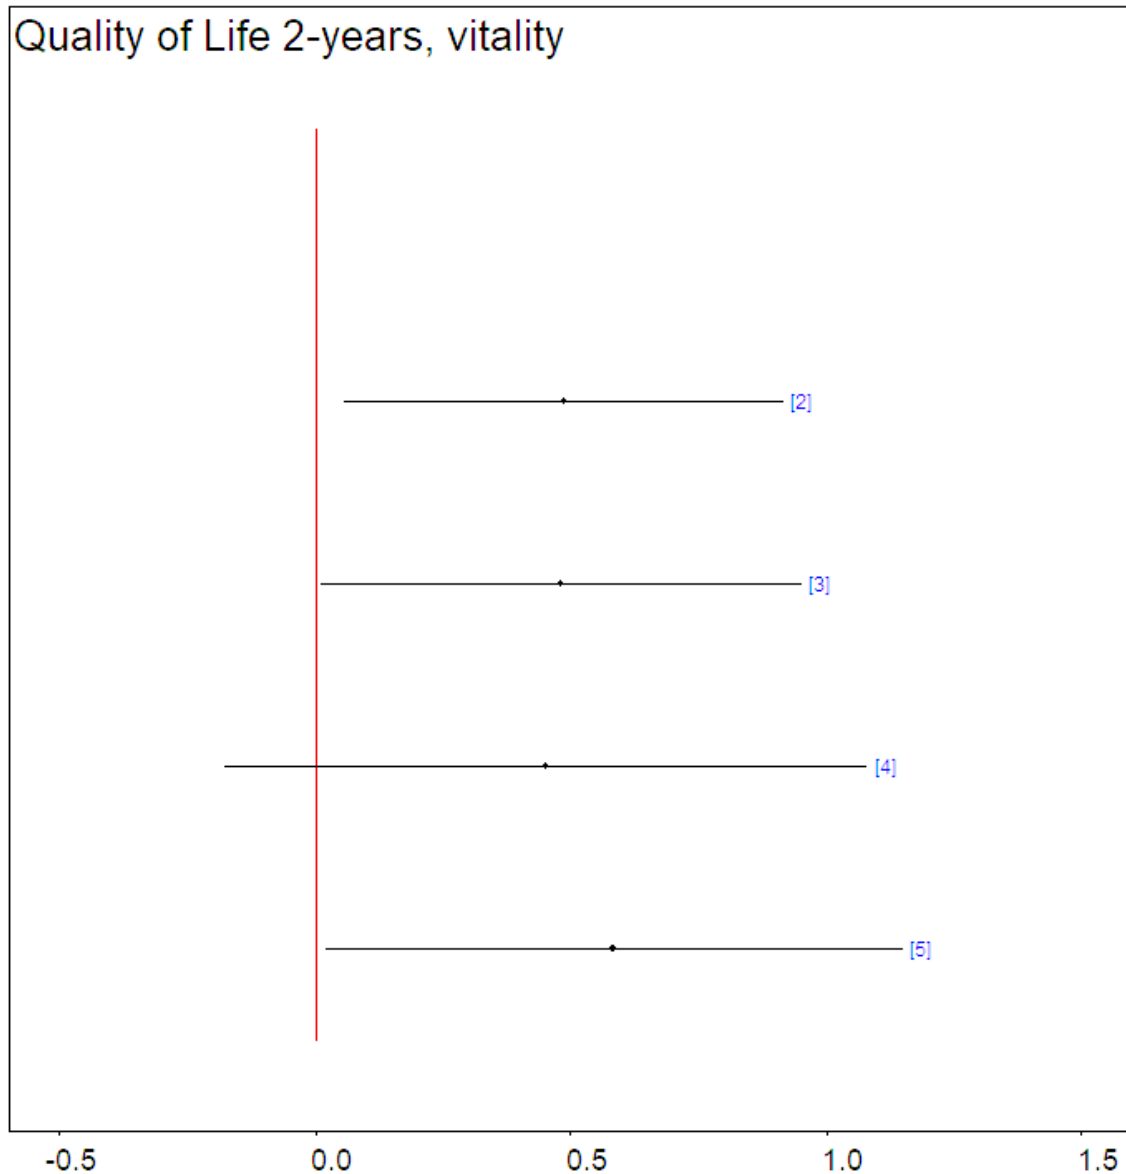

| node | mean   | sd     | MC error | 2.5%     | median | 97.5%  |
|------|--------|--------|----------|----------|--------|--------|
| d[2] | 0.4859 | 0.2188 | 7.917E-4 | 0.05769  | 0.4858 | 0.9149 |
| d[3] | 0.4794 | 0.2406 | 6.747E-4 | 0.008673 | 0.4791 | 0.9523 |
| d[4] | 0.4507 | 0.32   | 5.237E-4 | -0.1772  | 0.4507 | 1.078  |
| d[5] | 0.5822 | 0.2881 | 0.001008 | 0.0191   | 0.5816 | 1.149  |

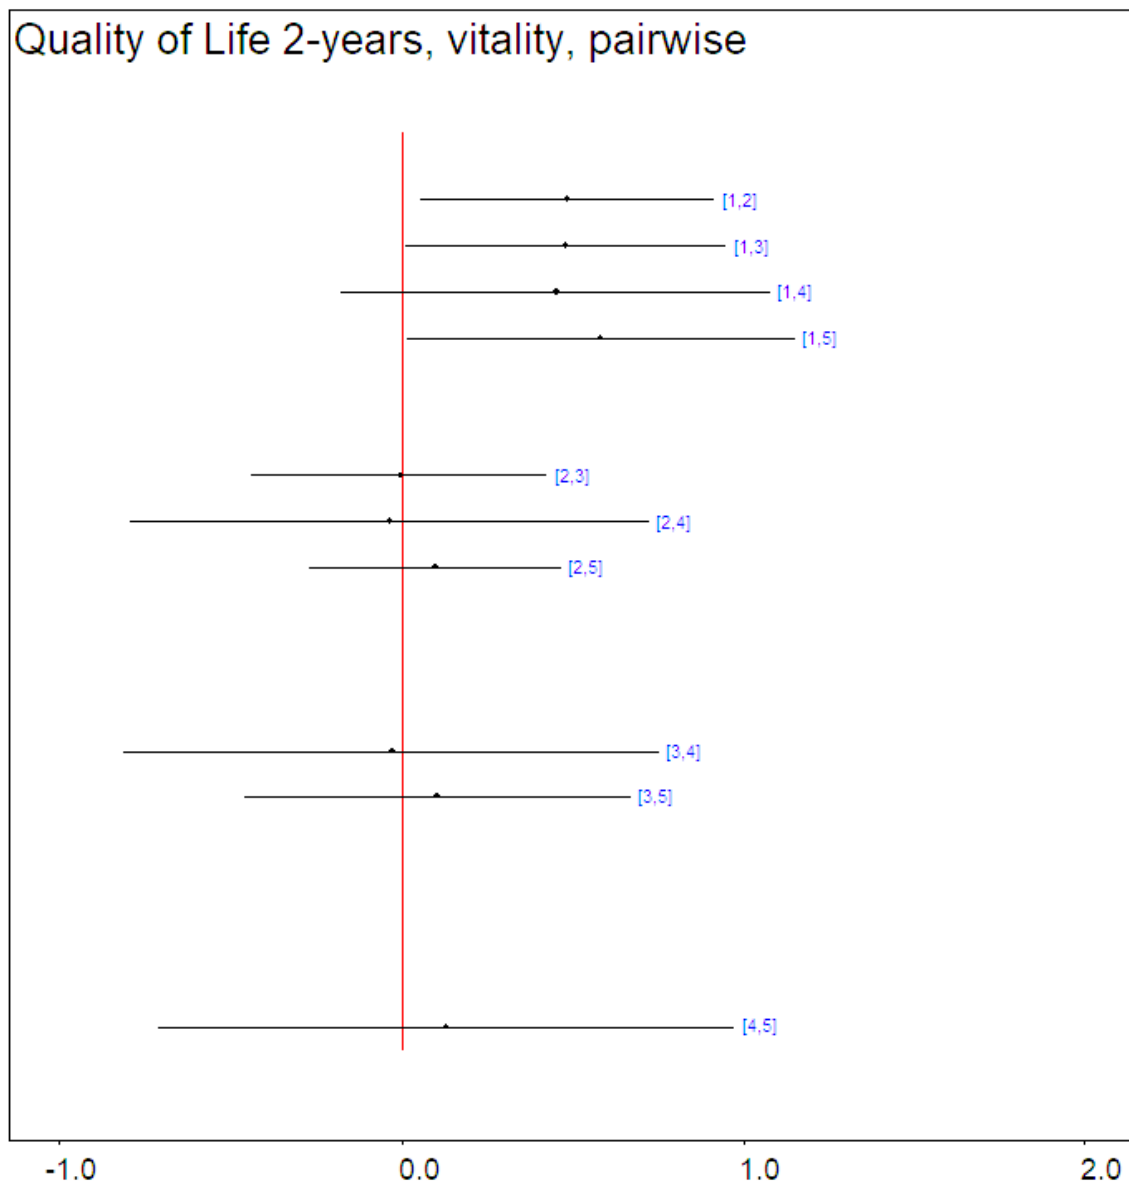

| node      | mean      | sd     | MC error | 2.5%     | median    | 97.5%  |
|-----------|-----------|--------|----------|----------|-----------|--------|
| diff[1,2] | 0.4859    | 0.2188 | 7.917E-4 | 0.05769  | 0.4858    | 0.9149 |
| diff[1,3] | 0.4794    | 0.2406 | 6.747E-4 | 0.008673 | 0.4791    | 0.9523 |
| diff[1,4] | 0.4507    | 0.32   | 5.237E-4 | -0.1772  | 0.4507    | 1.078  |
| diff[1,5] | 0.5822    | 0.2881 | 0.001008 | 0.0191   | 0.5816    | 1.149  |
| diff[2,3] | -0.006498 | 0.219  | 3.698E-4 | -0.4365  | -0.006304 | 0.4231 |
| diff[2,4] | -0.03517  | 0.3874 | 9.432E-4 | -0.7937  | -0.03452  | 0.7251 |
| diff[2,5] | 0.09633   | 0.1881 | 3.209E-4 | -0.2727  | 0.09659   | 0.4654 |
| diff[3,4] | -0.02867  | 0.4001 | 8.501E-4 | -0.8137  | -0.02921  | 0.7525 |
| diff[3,5] | 0.1028    | 0.2882 | 5.824E-4 | -0.4628  | 0.1029    | 0.6686 |
| diff[4,5] | 0.1315    | 0.4309 | 0.001133 | -0.7118  | 0.1312    | 0.9757 |

## QoL 2-years physical role

3 studies

Legend:

- 1 LSG
- 2 LRYGB
- 3 BPD-DS
- 4 LAGB
- 5 Distal-GB

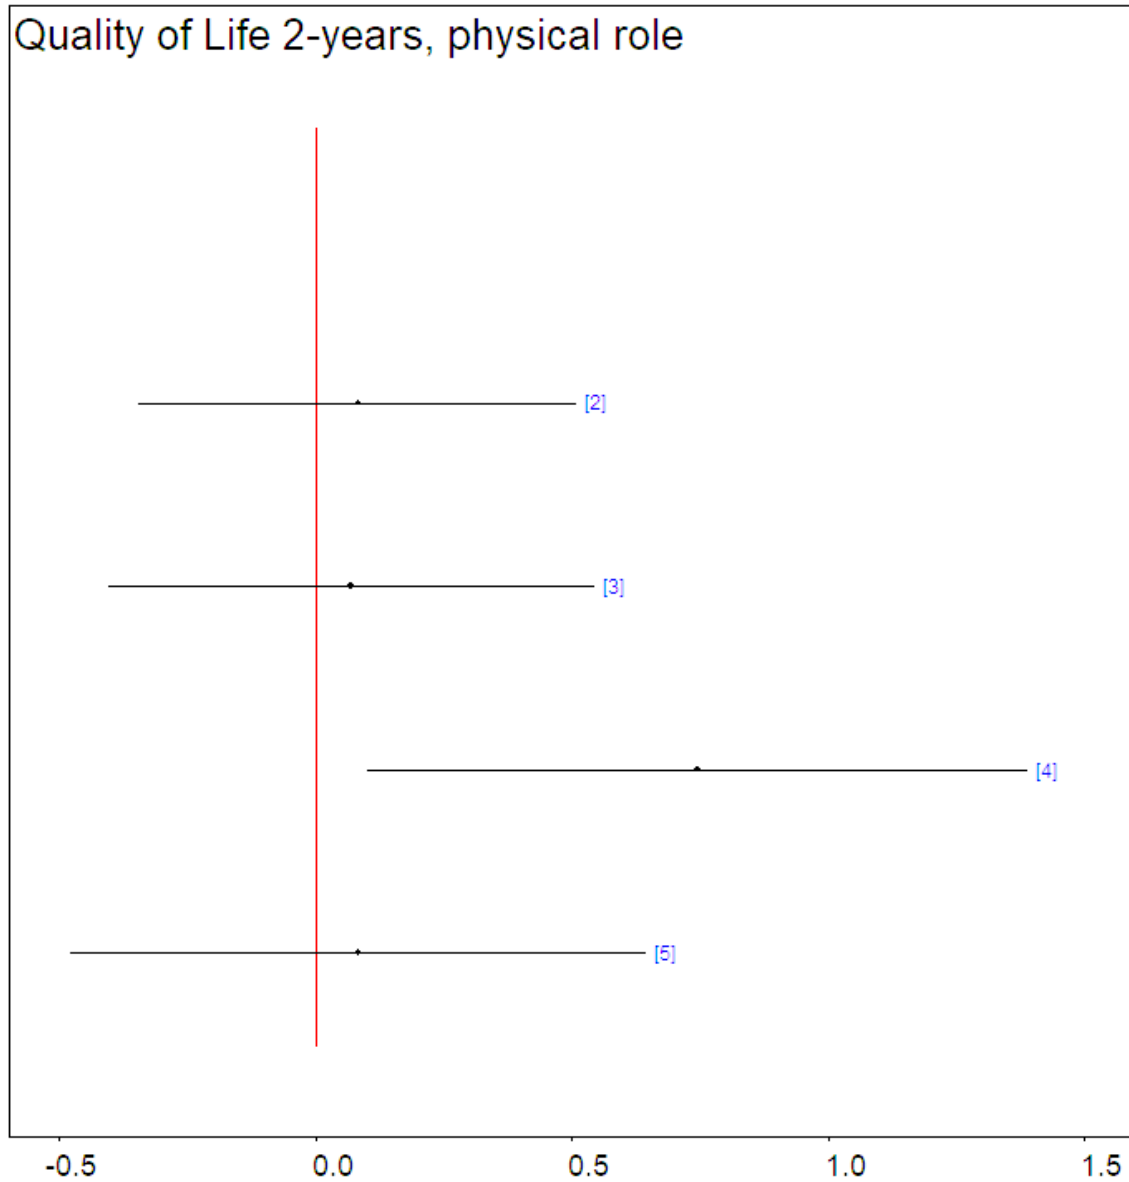

| node | mean    | sd     | MC error | 2.5%    | median  | 97.5%  |
|------|---------|--------|----------|---------|---------|--------|
| d[2] | 0.08099 | 0.2179 | 7.848E-4 | -0.3454 | 0.08079 | 0.5084 |
| d[3] | 0.06674 | 0.2418 | 6.725E-4 | -0.406  | 0.0666  | 0.542  |
| d[4] | 0.745   | 0.3274 | 5.358E-4 | 0.1026  | 0.745   | 1.387  |
| d[5] | 0.08076 | 0.2874 | 0.001001 | -0.4809 | 0.08013 | 0.6457 |

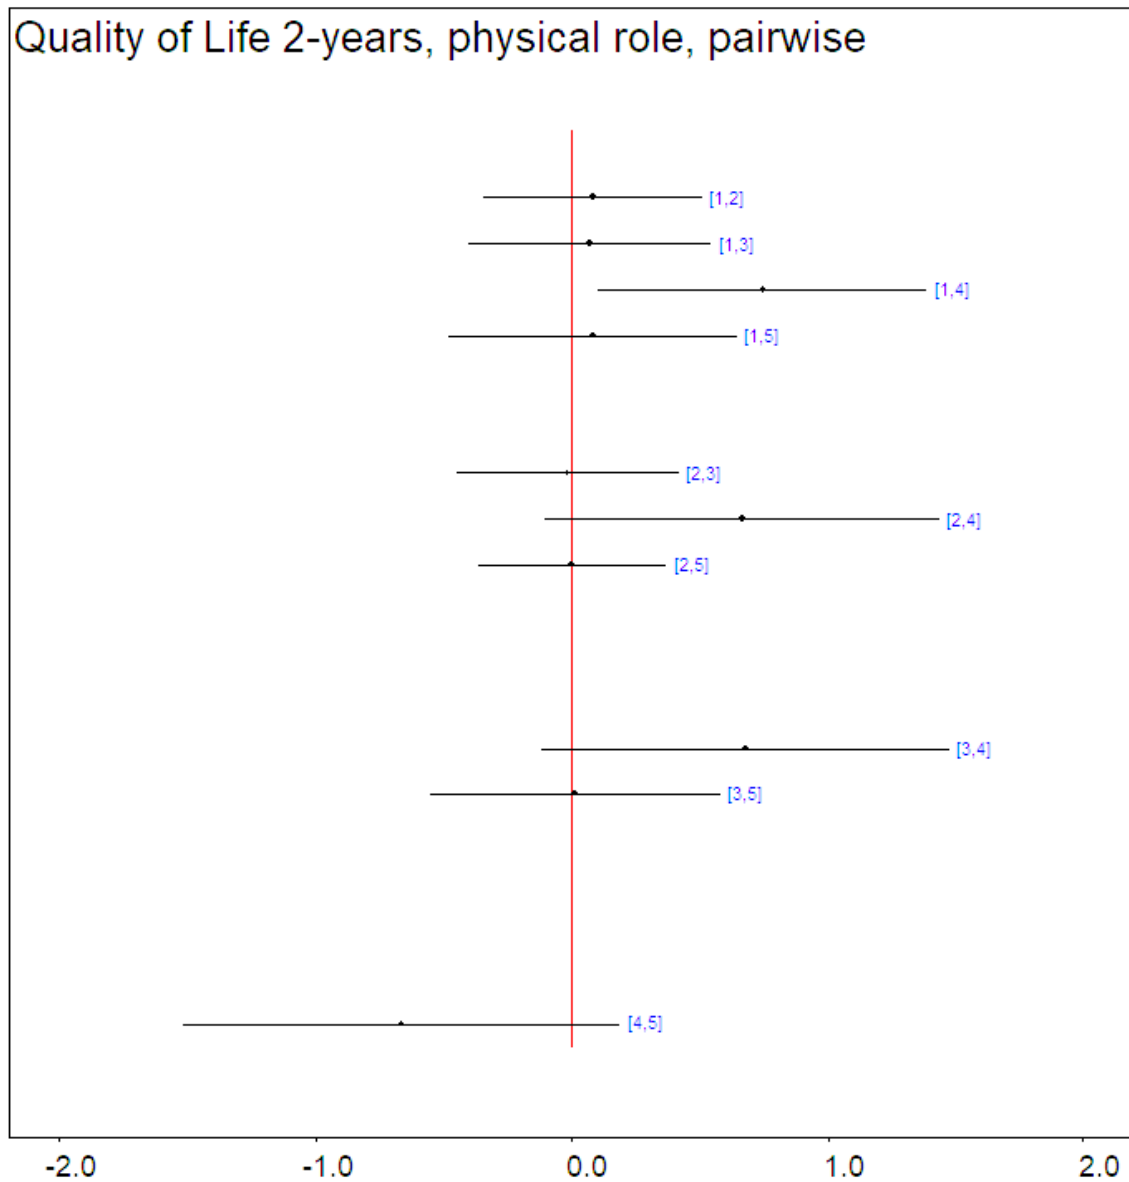

| node      | mean      | sd     | MC error | 2.5%    | median   | 97.5%  |
|-----------|-----------|--------|----------|---------|----------|--------|
| diff[1,2] | 0.08099   | 0.2179 | 7.848E-4 | -0.3454 | 0.08079  | 0.5084 |
| diff[1,3] | 0.06674   | 0.2418 | 6.725E-4 | -0.406  | 0.0666   | 0.542  |
| diff[1,4] | 0.745     | 0.3274 | 5.358E-4 | 0.1026  | 0.745    | 1.387  |
| diff[1,5] | 0.08076   | 0.2874 | 0.001001 | -0.4809 | 0.08013  | 0.6457 |
| diff[2,3] | -0.01425  | 0.2206 | 3.711E-4 | -0.4474 | -0.01408 | 0.4183 |
| diff[2,4] | 0.664     | 0.393  | 9.441E-4 | -0.1057 | 0.6645   | 1.435  |
| diff[2,5] | -2.367E-4 | 0.1879 | 3.207E-4 | -0.3691 | 2.827E-5 | 0.3686 |
| diff[3,4] | 0.6783    | 0.4068 | 8.558E-4 | -0.1196 | 0.6776   | 1.472  |
| diff[3,5] | 0.01401   | 0.2894 | 5.823E-4 | -0.5536 | 0.01414  | 0.5821 |
| diff[4,5] | -0.6642   | 0.4359 | 0.001133 | -1.517  | -0.6647  | 0.1901 |

### QoL 2-years social

5 studies

**Legend:**

- 1 LSG
- 2 LRYGB
- 3 BPD-DS
- 4 LAGB
- 5 Distal-GB

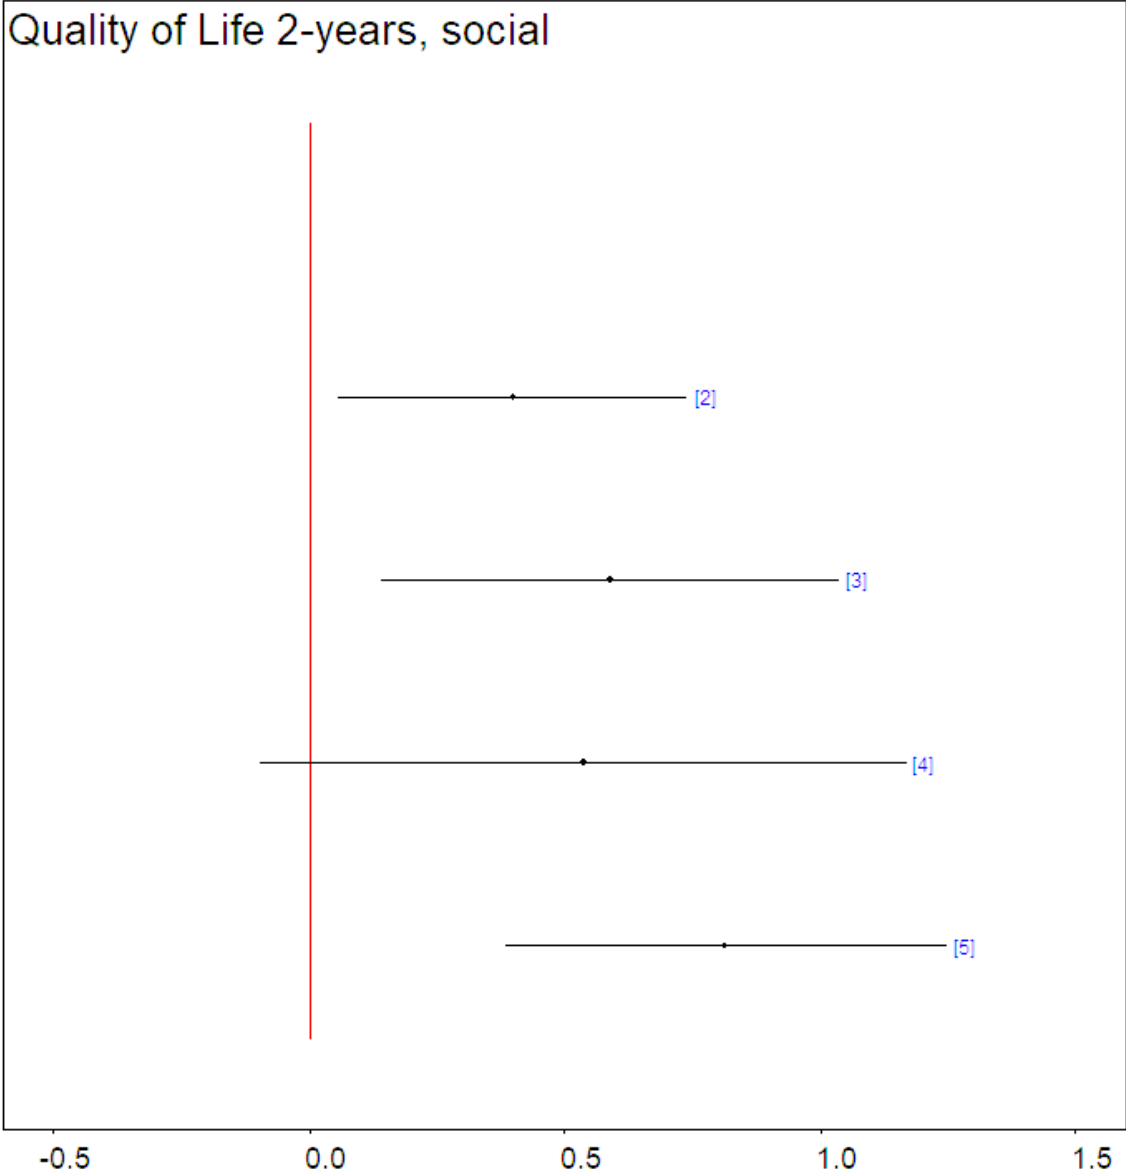

| node | mean   | sd     | MC error | 2.5%     | median | 97.5%  |
|------|--------|--------|----------|----------|--------|--------|
| d[2] | 0.3975 | 0.1747 | 6.542E-4 | 0.05601  | 0.3972 | 0.7399 |
| d[3] | 0.5883 | 0.2285 | 5.921E-4 | 0.1417   | 0.5882 | 1.037  |
| d[4] | 0.536  | 0.3218 | 5.266E-4 | -0.09535 | 0.536  | 1.167  |

|      |        |        |          |        |        |       |
|------|--------|--------|----------|--------|--------|-------|
| d[5] | 0.8139 | 0.2204 | 8.136E-4 | 0.3837 | 0.8137 | 1.247 |
|------|--------|--------|----------|--------|--------|-------|

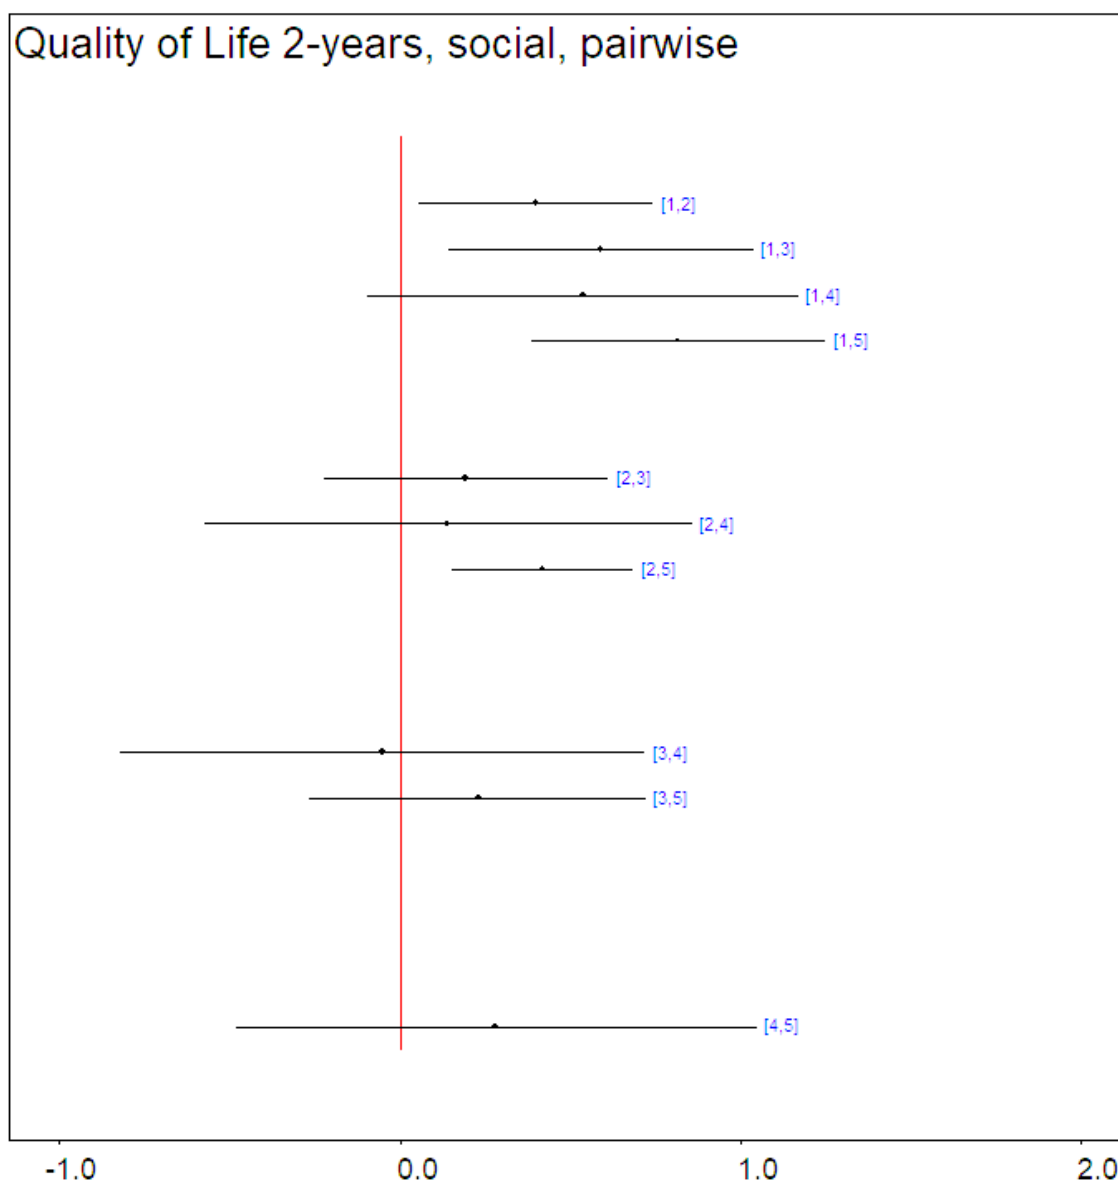

| node      | mean     | sd     | MC error | 2.5%     | median   | 97.5%  |
|-----------|----------|--------|----------|----------|----------|--------|
| diff[1,2] | 0.3975   | 0.1747 | 6.542E-4 | 0.05601  | 0.3972   | 0.7399 |
| diff[1,3] | 0.5883   | 0.2285 | 5.921E-4 | 0.1417   | 0.5882   | 1.037  |
| diff[1,4] | 0.536    | 0.3218 | 5.266E-4 | -0.09535 | 0.536    | 1.167  |
| diff[1,5] | 0.8139   | 0.2204 | 8.136E-4 | 0.3837   | 0.8137   | 1.247  |
| diff[2,3] | 0.1908   | 0.2135 | 3.603E-4 | -0.2283  | 0.1909   | 0.6097 |
| diff[2,4] | 0.1385   | 0.366  | 8.342E-4 | -0.5782  | 0.1386   | 0.8563 |
| diff[2,5] | 0.4164   | 0.1349 | 2.301E-4 | 0.1517   | 0.4166   | 0.6811 |
| diff[3,4] | -0.05229 | 0.3945 | 7.889E-4 | -0.8254  | -0.05261 | 0.7188 |
| diff[3,5] | 0.2256   | 0.2522 | 4.934E-4 | -0.2697  | 0.2256   | 0.7206 |
| diff[4,5] | 0.2779   | 0.3902 | 9.663E-4 | -0.4853  | 0.2776   | 1.044  |

## QoL 2-years mental

3 studies

Legend:

- 1 LSG
- 2 LRYGB
- 3 BPD-DS
- 4 LAGB
- 5 Distal-GB

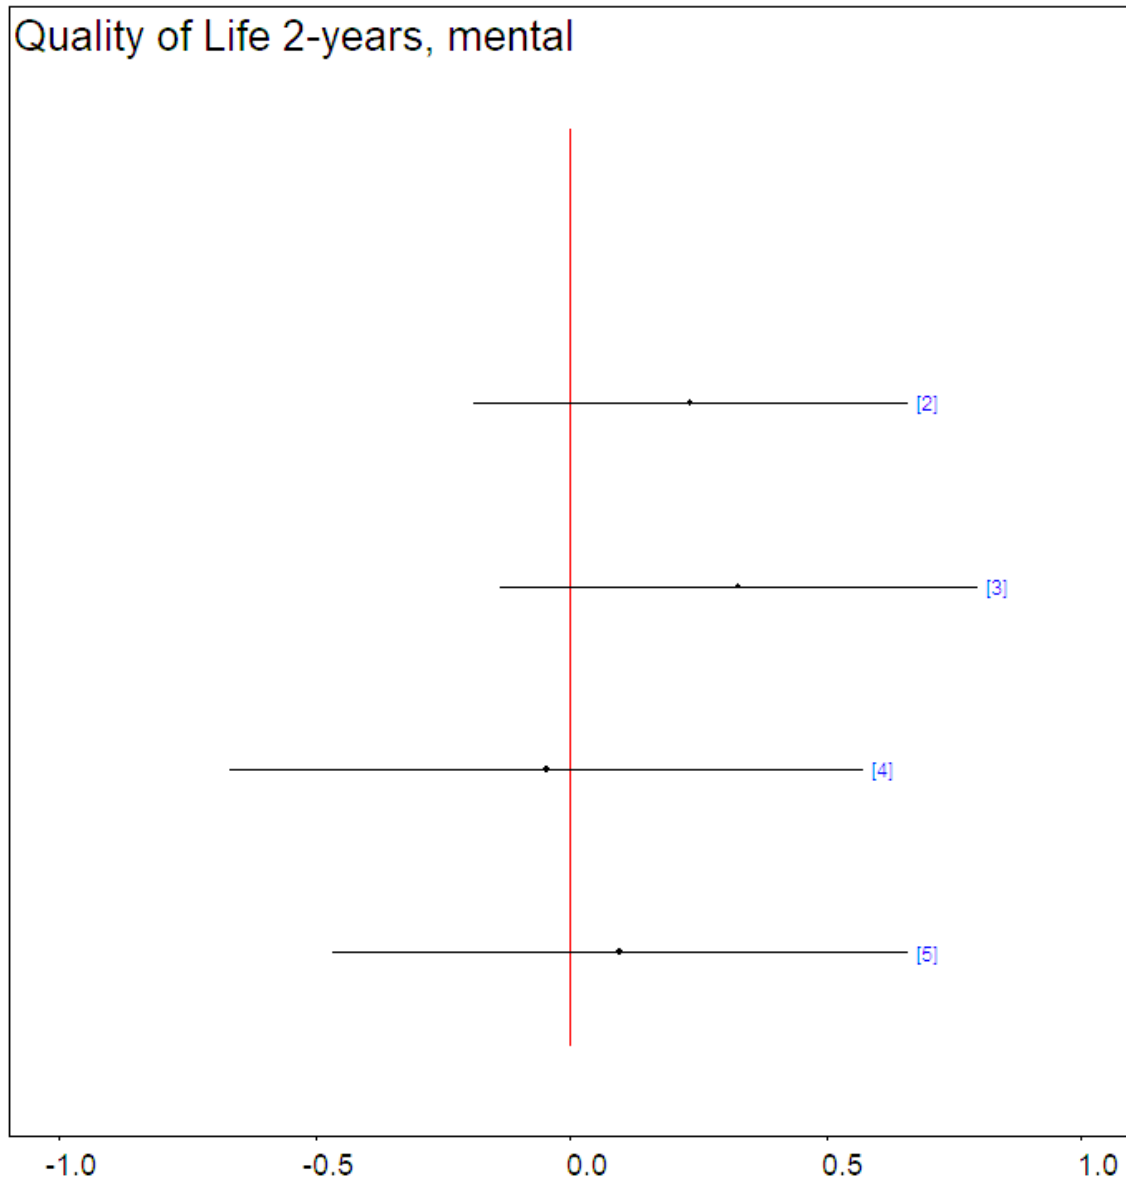

| node | mean     | sd     | MC error | 2.5%    | median   | 97.5%  |
|------|----------|--------|----------|---------|----------|--------|
| d[2] | 0.2341   | 0.2172 | 7.8E-4   | -0.1909 | 0.234    | 0.6601 |
| d[3] | 0.3271   | 0.2384 | 6.615E-4 | -0.1392 | 0.327    | 0.7959 |
| d[4] | -0.04757 | 0.3157 | 5.167E-4 | -0.6671 | -0.04759 | 0.5717 |
| d[5] | 0.09554  | 0.287  | 9.97E-4  | -0.465  | 0.09492  | 0.6598 |



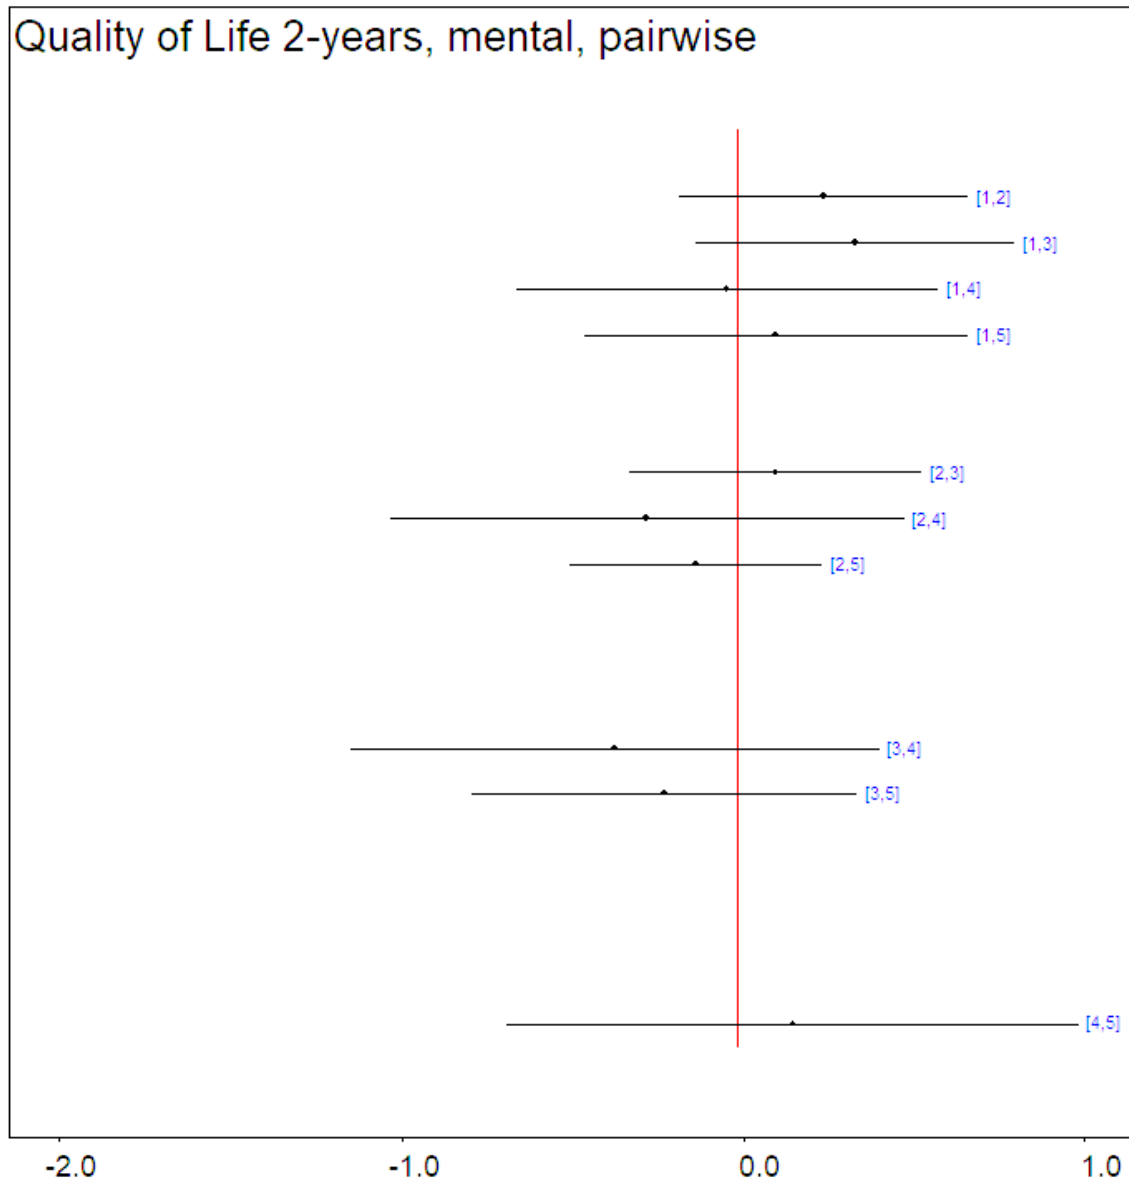

| node      | mean     | sd     | MC error | 2.5%    | median   | 97.5%  |
|-----------|----------|--------|----------|---------|----------|--------|
| diff[1,2] | 0.2341   | 0.2172 | 7.8E-4   | -0.1909 | 0.234    | 0.6601 |
| diff[1,3] | 0.3271   | 0.2384 | 6.615E-4 | -0.1392 | 0.327    | 0.7959 |
| diff[1,4] | -0.04757 | 0.3157 | 5.167E-4 | -0.6671 | -0.04759 | 0.5717 |
| diff[1,5] | 0.09554  | 0.287  | 9.97E-4  | -0.465  | 0.09492  | 0.6598 |
| diff[2,3] | 0.09297  | 0.2187 | 3.704E-4 | -0.3364 | 0.09319  | 0.522  |
| diff[2,4] | -0.2817  | 0.383  | 9.297E-4 | -1.032  | -0.2811  | 0.4699 |
| diff[2,5] | -0.1386  | 0.1882 | 3.211E-4 | -0.5079 | -0.1383  | 0.2307 |
| diff[3,4] | -0.3747  | 0.3954 | 8.355E-4 | -1.15   | -0.3753  | 0.3975 |
| diff[3,5] | -0.2316  | 0.2881 | 5.834E-4 | -0.7966 | -0.2315  | 0.3339 |
| diff[4,5] | 0.1431   | 0.4269 | 0.00112  | -0.6926 | 0.1429   | 0.9798 |

## QoL 2-years bodily pain

3 studies

Legend:

- 1 LSG
- 2 LRYGB
- 3 BPD-DS
- 4 LAGB
- 5 Distal-GB

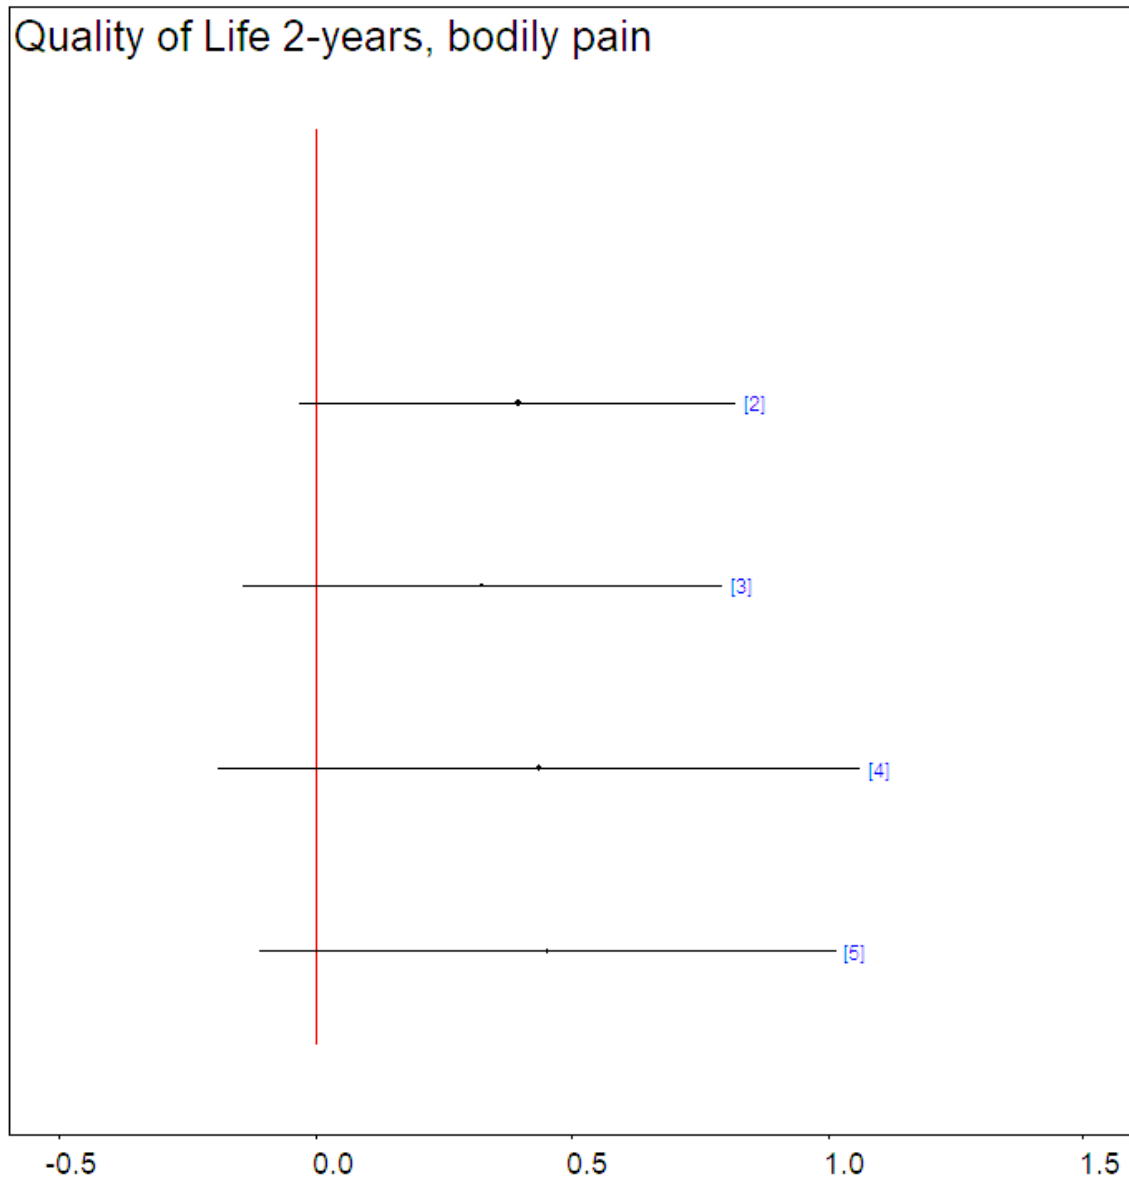

| node | mean   | sd     | MC error | 2.5%     | median | 97.5%  |
|------|--------|--------|----------|----------|--------|--------|
| d[2] | 0.3936 | 0.2176 | 7.841E-4 | -0.03226 | 0.3935 | 0.8206 |
| d[3] | 0.3248 | 0.2394 | 6.673E-4 | -0.1434  | 0.3246 | 0.7954 |
| d[4] | 0.4368 | 0.3197 | 5.233E-4 | -0.1906  | 0.4368 | 1.064  |
| d[5] | 0.4518 | 0.2872 | 0.001001 | -0.1094  | 0.4512 | 1.016  |

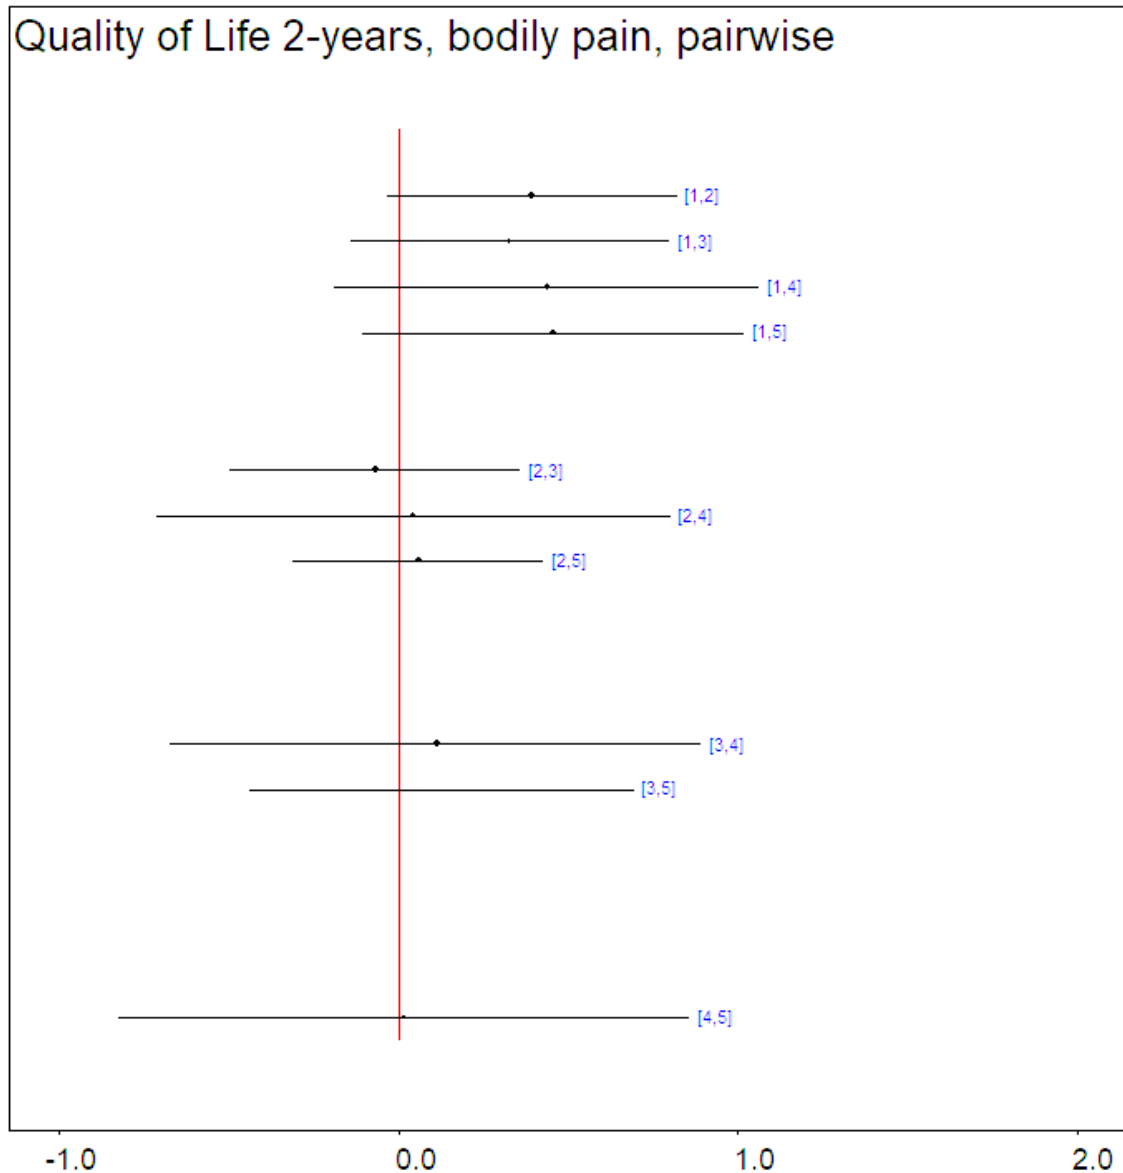

| node      | mean     | sd     | MC error | 2.5%     | median   | 97.5%  |
|-----------|----------|--------|----------|----------|----------|--------|
| diff[1,2] | 0.3936   | 0.2176 | 7.841E-4 | -0.03226 | 0.3935   | 0.8206 |
| diff[1,3] | 0.3248   | 0.2394 | 6.673E-4 | -0.1434  | 0.3246   | 0.7954 |
| diff[1,4] | 0.4368   | 0.3197 | 5.233E-4 | -0.1906  | 0.4368   | 1.064  |
| diff[1,5] | 0.4518   | 0.2872 | 0.001001 | -0.1094  | 0.4512   | 1.016  |
| diff[2,3] | -0.06887 | 0.2187 | 3.696E-4 | -0.4984  | -0.06867 | 0.3601 |
| diff[2,4] | 0.04319  | 0.3866 | 9.366E-4 | -0.7137  | 0.04378  | 0.8019 |
| diff[2,5] | 0.05816  | 0.188  | 3.207E-4 | -0.3107  | 0.05842  | 0.4271 |
| diff[3,4] | 0.1121   | 0.3992 | 8.44E-4  | -0.6711  | 0.1115   | 0.8915 |
| diff[3,5] | 0.127    | 0.288  | 5.821E-4 | -0.438   | 0.1271   | 0.6924 |
| diff[4,5] | 0.01497  | 0.4301 | 0.001127 | -0.8269  | 0.01458  | 0.8577 |

## Total QoL 3-years

9 studies

**Legend:**

- 1 LI
- 2 LSG
- 3 LRYGB
- 4 BPD-DS
- 5 LAGB
- 6 Banded-GB

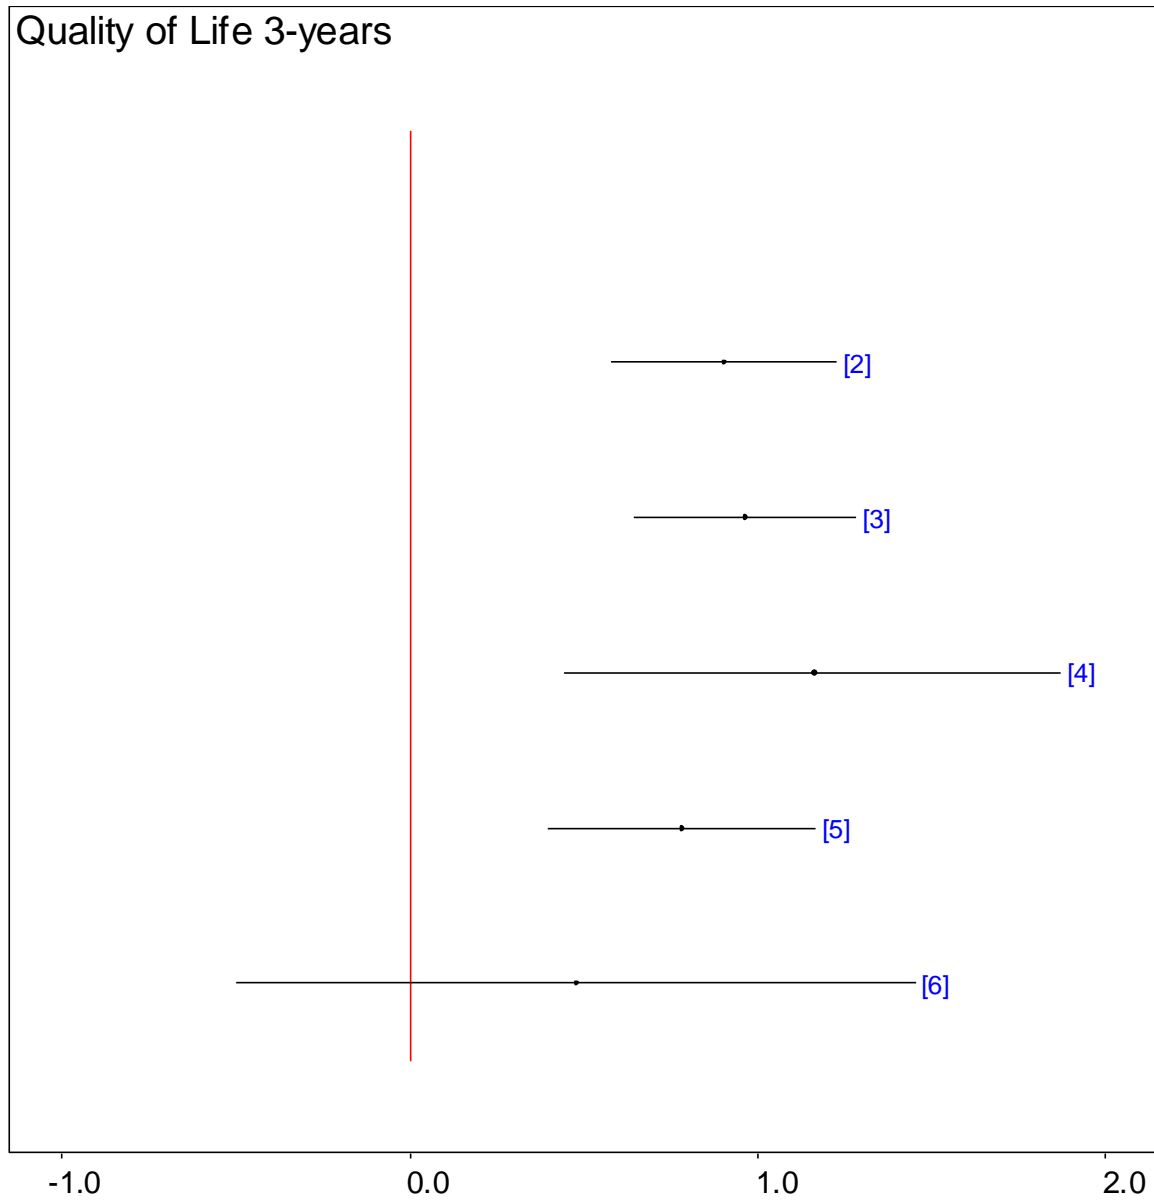

| node | mean   | sd     | MC error | 2.5%   | median | 97.5% |
|------|--------|--------|----------|--------|--------|-------|
| d[2] | 0.9037 | 0.1658 | 0.001099 | 0.581  | 0.9032 | 1.23  |
| d[3] | 0.9646 | 0.1629 | 0.001065 | 0.6475 | 0.9641 | 1.285 |
| d[4] | 1.161  | 0.3646 | 0.001554 | 0.4455 | 1.162  | 1.874 |
| d[5] | 0.7831 | 0.1963 | 0.00117  | 0.3998 | 0.7828 | 1.168 |

|           |       |        |         |         |        |       |
|-----------|-------|--------|---------|---------|--------|-------|
| d[6]      | 0.479 | 0.4985 | 0.00187 | -0.4994 | 0.4784 | 1.455 |
| totresdev | 15.94 | 6.051  | 0.04308 | 6.006   | 15.3   | 28.59 |

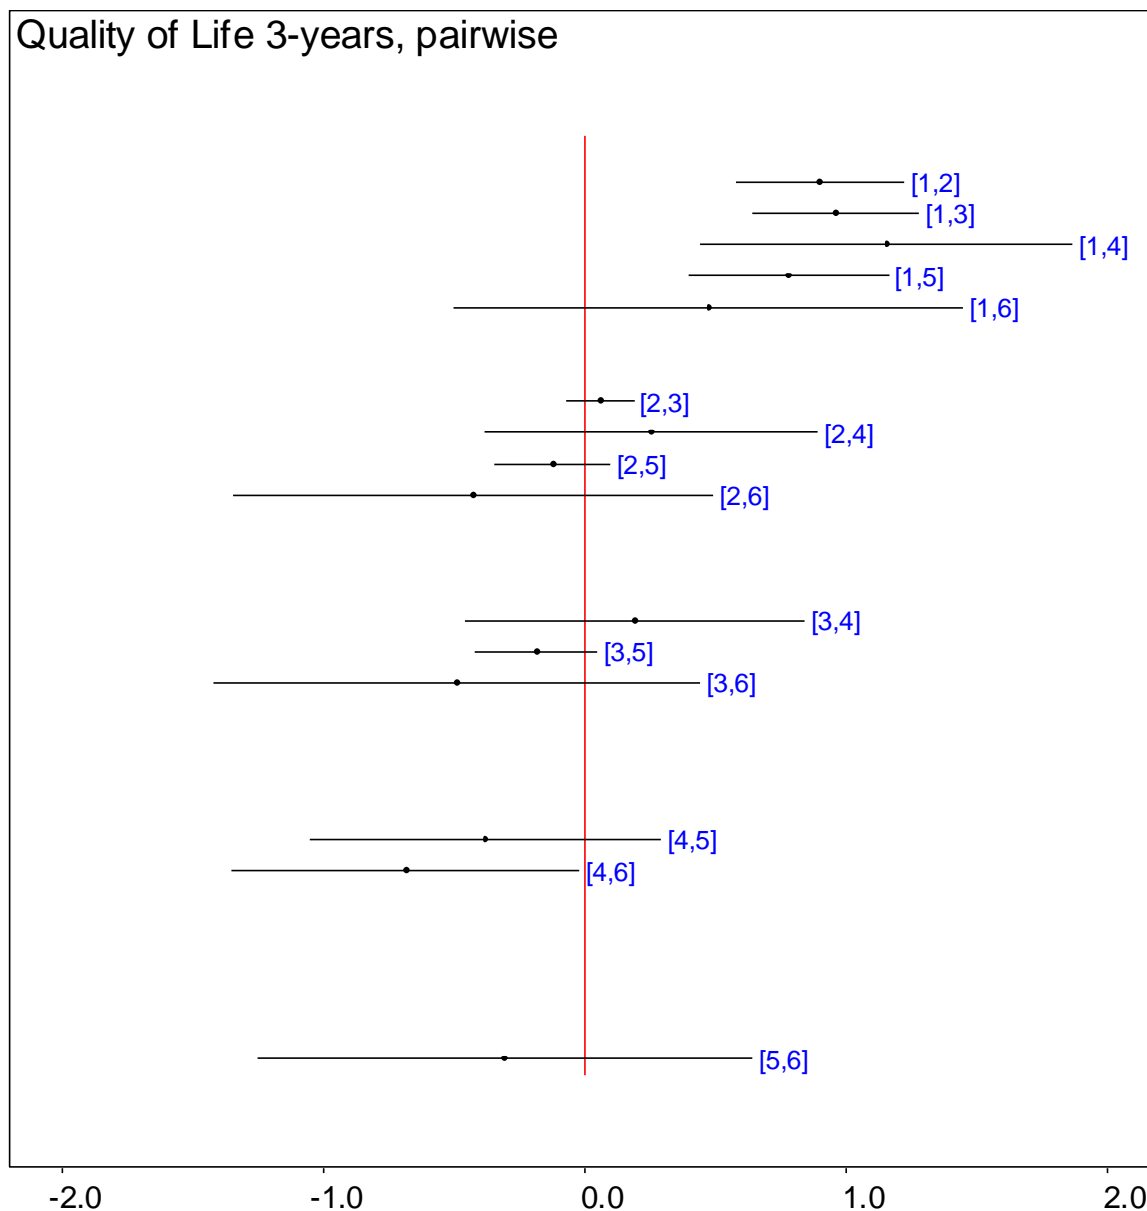

| node      | mean    | sd      | MC error | 2.5%     | median  | 97.5%   |
|-----------|---------|---------|----------|----------|---------|---------|
| diff[1,2] | 0.9037  | 0.1658  | 0.001099 | 0.581    | 0.9032  | 1.23    |
| diff[1,3] | 0.9646  | 0.1629  | 0.001065 | 0.6475   | 0.9641  | 1.285   |
| diff[1,4] | 1.161   | 0.3646  | 0.001554 | 0.4455   | 1.162   | 1.874   |
| diff[1,5] | 0.7831  | 0.1963  | 0.00117  | 0.3998   | 0.7828  | 1.168   |
| diff[1,6] | 0.479   | 0.4985  | 0.00187  | -0.4994  | 0.4784  | 1.455   |
| diff[2,3] | 0.0609  | 0.06682 | 9.55E-5  | -0.06991 | 0.06091 | 0.1922  |
| diff[2,4] | 0.2577  | 0.3251  | 9.344E-4 | -0.3802  | 0.2578  | 0.8937  |
| diff[2,5] | -0.1206 | 0.1127  | 1.852E-4 | -0.3416  | -0.1205 | 0.1003  |
| diff[2,6] | -0.4247 | 0.4704  | 0.00136  | -1.347   | -0.4248 | 0.4979  |
| diff[3,4] | 0.1968  | 0.332   | 9.645E-4 | -0.4544  | 0.1973  | 0.8462  |
| diff[3,5] | -0.1815 | 0.1196  | 2.091E-4 | -0.4164  | -0.1815 | 0.05293 |
| diff[3,6] | -0.4856 | 0.4749  | 0.001387 | -1.417   | -0.4861 | 0.446   |

|           |         |        |          |        |         |          |
|-----------|---------|--------|----------|--------|---------|----------|
| diff[4,5] | -0.3783 | 0.3439 | 9.662E-4 | -1.052 | -0.3783 | 0.2946   |
| diff[4,6] | -0.6823 | 0.3403 | 5.791E-4 | -1.35  | -0.6819 | -0.01565 |
| diff[5,6] | -0.304  | 0.4836 | 0.001383 | -1.25  | -0.3048 | 0.6438   |

### Total QoL 5-years

7 studies

**Legend:**

- 1 LI
- 2 LSG
- 3 LRYGB
- 4 BPD-DS
- 5 OAGB

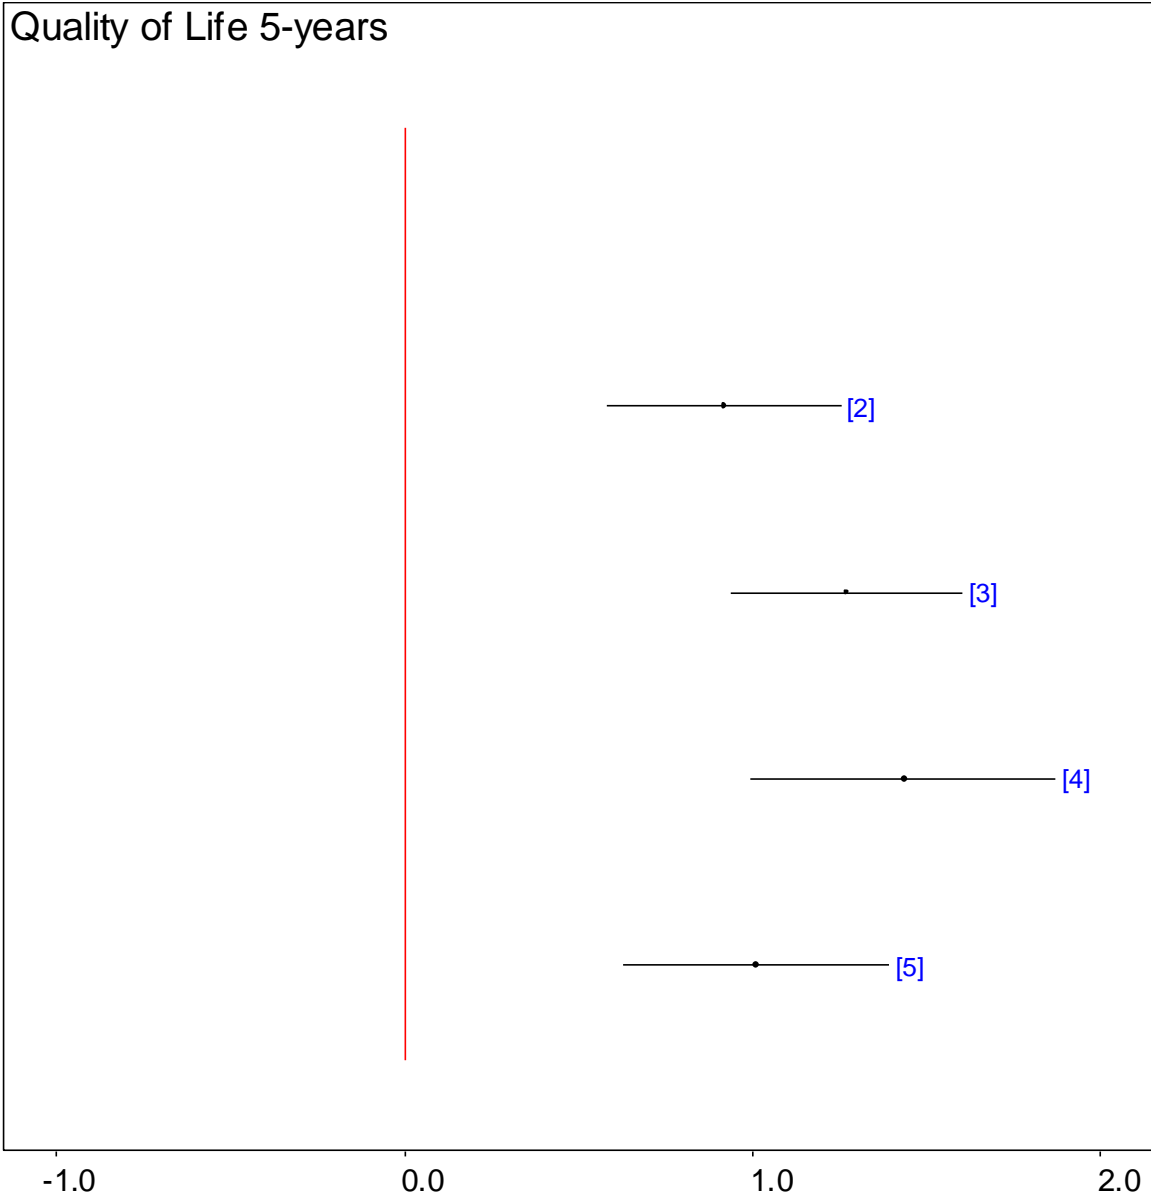

| node | mean   | sd     | MC error | 2.5%   | median | 97.5% |
|------|--------|--------|----------|--------|--------|-------|
| d[2] | 0.9174 | 0.1713 | 0.001069 | 0.5841 | 0.9168 | 1.255 |
| d[3] | 1.269  | 0.1704 | 0.001085 | 0.9371 | 1.269  | 1.605 |
| d[4] | 1.434  | 0.2234 | 0.001188 | 0.9964 | 1.433  | 1.873 |

|           |       |        |          |        |       |       |
|-----------|-------|--------|----------|--------|-------|-------|
| d[5]      | 1.009 | 0.1956 | 0.001154 | 0.6285 | 1.009 | 1.395 |
| totresdev | 9.02  | 4.253  | 0.007132 | 2.703  | 8.361 | 19.02 |

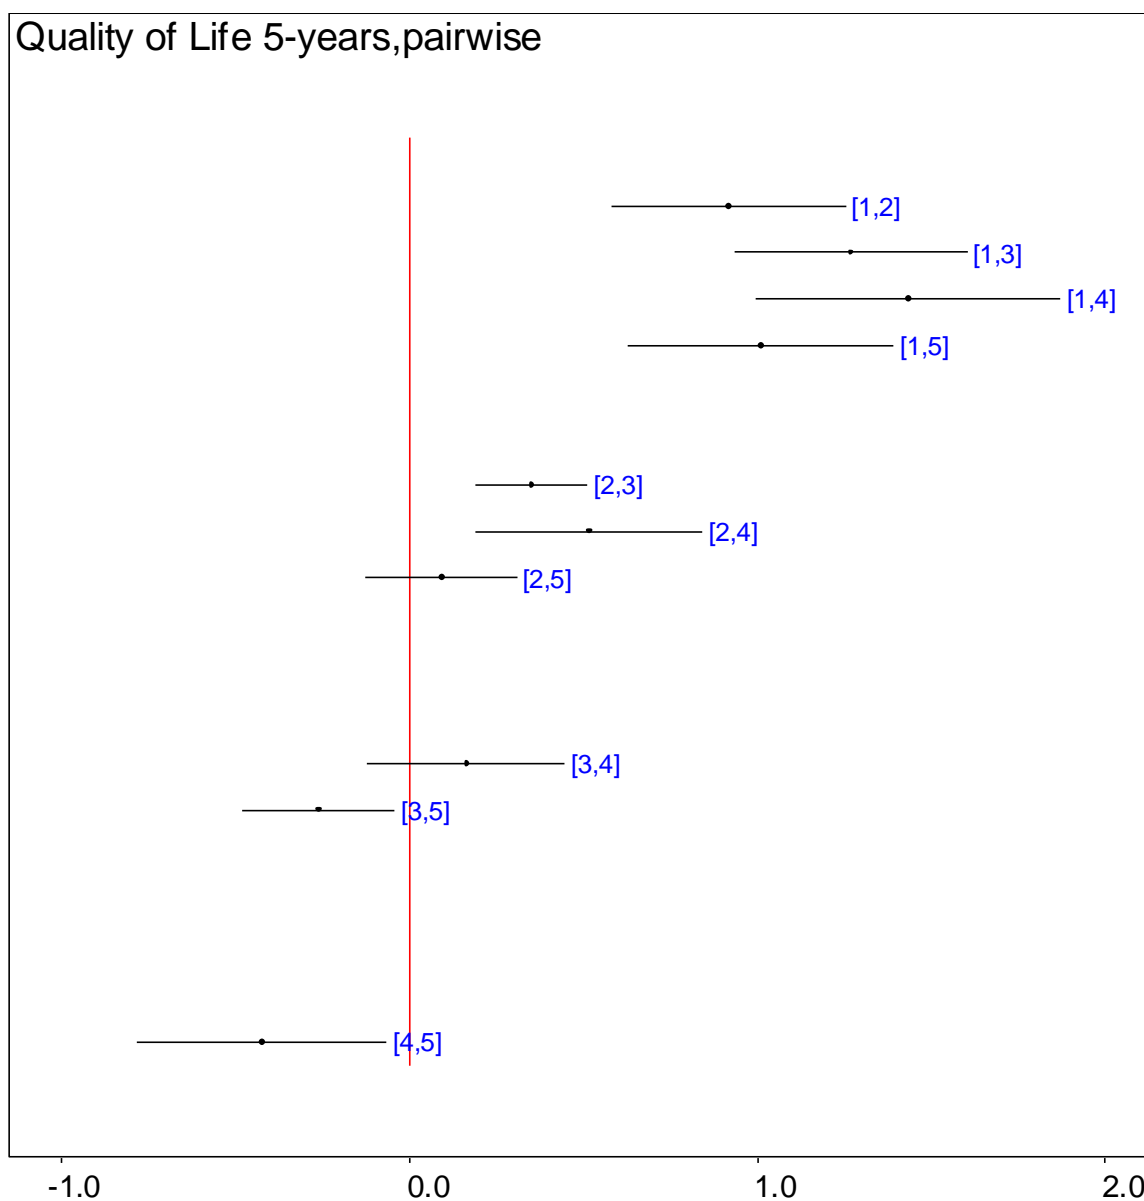

| node      | mean    | sd      | MC error | 2.5%    | median  | 97.5%    |
|-----------|---------|---------|----------|---------|---------|----------|
| diff[1,2] | 0.9174  | 0.1713  | 0.001069 | 0.5841  | 0.9168  | 1.255    |
| diff[1,3] | 1.269   | 0.1704  | 0.001085 | 0.9371  | 1.269   | 1.605    |
| diff[1,4] | 1.434   | 0.2234  | 0.001188 | 0.9964  | 1.433   | 1.873    |
| diff[1,5] | 1.009   | 0.1956  | 0.001154 | 0.6285  | 1.009   | 1.395    |
| diff[2,3] | 0.3518  | 0.08225 | 1.211E-4 | 0.1909  | 0.3519  | 0.5127   |
| diff[2,4] | 0.5164  | 0.1663  | 3.051E-4 | 0.1912  | 0.5166  | 0.8421   |
| diff[2,5] | 0.09205 | 0.1111  | 1.837E-4 | -0.1261 | 0.09196 | 0.3104   |
| diff[3,4] | 0.1646  | 0.1448  | 2.446E-4 | -0.1199 | 0.1648  | 0.4485   |
| diff[3,5] | -0.2598 | 0.1116  | 1.879E-4 | -0.4782 | -0.2598 | -0.04122 |
| diff[4,5] | -0.4243 | 0.1827  | 3.236E-4 | -0.7836 | -0.4245 | -0.06665 |
